# Supplementary material
Source: PubMed Central journal article supplement (PMC3837490)
Supplement: NIHMS448204-supplement-Supporting_Information.pdf [file NIHMS448204-supplement-Supporting_Information.pdf]

## Supporting Information

### **Silver-Catalyzed Aldehyde Olefination Using Siloxy Alkynes**

Jianwei Sun, Valerie A. Keller, Todd S. Meyer and Sergey A. Kozmin\*

*University of Chicago, Department of Chemistry*

*5735 South Ellis Ave., Chicago, IL 60637*

**General.** Ethyl acetate (ACS grade), hexanes (ACS grade) and diethyl ether (ACS grade) were purchased from Fisher Scientific and used without further purification. Anhydrous dichloromethane (HPLC grade) was purified by distillation over calcium hydride. Anhydrous tetrahydrofuran was freshly distilled from sodium-benzophenone. Triisopropylsilyl trifluoromethanesulfonate (TIPSOTf) was distilled under reduced pressure over calcium hydride. Commercially available reagents were used without further purification. Reactions were monitored by thin layer chromatography (TLC) using Whatman precoated silica gel plates. Flash column chromatography was performed over Silicycle silica gel (230-400 mesh).  $^1\text{H}$  NMR and  $^{13}\text{C}$  NMR spectra were recorded on Bruker DRX-400 or DMX-500 spectrometers using residual solvent peaks as an internal standard. Infrared spectra were recorded with a Nicolet FTIR spectrometer and are reported in reciprocal centimeter ( $\text{cm}^{-1}$ ). Mass spectra were recorded with an Agilent 1100 LCMS using the following conditions unless otherwise noted; APCI, POS, SCAN, 70, with methanol or dichloromethane as the eluting solvent.

#### General Procedure A: Preparation of Siloxy Alkynes

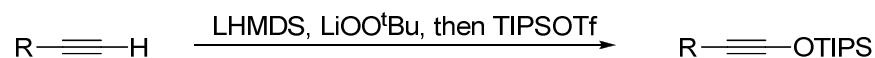

Anhydrous *tert*-butyl hydroperoxide (TBHP) was prepared following a detailed literature procedure.<sup>1</sup> CAUTION: SOLUTIONS OF OXIDANTS AND OXIDIZABLE SUBSTRATES ARE POTENTIALLY HAZARDOUS AND POSSIBLY SUBJECT TO VIOLENT DECOMPOSITION BY ADVENTITIOUS CATALYSTS. Safety considerations related to handling solutions of TBHP have been previously discussed. See reference 1 and further references cited therein.

A solution of alkyne (2 mmol) in THF (10 mL) was treated at  $-78$  °C with freshly prepared 1.0 M solution of LiHMDS in THF (2.4 mL). At the same time, a solution of lithium *t*-butyl peroxide was generated through treating a solution of anhydrous *t*-butyl hydrogen peroxide (3.7 M in toluene, 2.4 mmol, 0.65 mL) in THF (10 mL) with 1.0 M LiHMDS (2.6 mL) at  $-78$  °C. Lithium *t*-butyl peroxide solution was

transferred to the alkynyllithium solution via cannula and the resulting mixture was allowed to warm to 0 °C over 0.5 h, stirred at the same temperature for 2 h and cooled to -78 °C before the drop-wise addition of triisopropylsilyl trifluoromethanesulfonate (2.6 mmol, 0.7 mL). The resulting reaction mixture was allowed to warm up to 0 °C, stirred for 0.5 h and diluted with hexanes (50 mL). The organic layer was washed with saturated aqueous NaHCO<sub>3</sub> (40 mL), H<sub>2</sub>O (40 mL), brine (30 mL), dried (Na<sub>2</sub>SO<sub>4</sub>), filtered and concentrated. The residue was subjected to purification via Kugelrohr distillation.

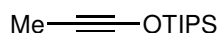

The above siloxy alkyne was prepared in 80% yield according to the general procedure A except that the product was purified by silica gel column (pretreated with Et<sub>3</sub>N) chromatography. <sup>1</sup>H NMR (500 Hz, CDCl<sub>3</sub>) δ 1.66 (s, 3H), 1.27-1.20 (m, 3H), 1.10 (d, 18H, *J* = 7.5 Hz); <sup>13</sup>C NMR (125 Hz, CDCl<sub>3</sub>) δ 85.4, 25.5, 17.3, 11.8, 1.51; IR (neat, cm<sup>-1</sup>) 2947, 2869, 2289, 1464; MS(APCI) Calculated for [C<sub>12</sub>H<sub>24</sub>OSi]<sup>+</sup>: 212.16; [M<sup>+</sup> + MeOH + H]: 245.19; Found: 245.1.

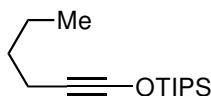

The above siloxy alkyne was prepared in 95% yield according to the general procedure A. <sup>1</sup>H NMR (500 MHz, CDCl<sub>3</sub>) δ 2.05 (t, 2H, *J* = 6.3 Hz), 1.41-1.35 (m, 4H), 1.27-1.20 (m, 3H), 1.11 (d, 18H, *J* = 7.5 Hz), 0.87 (t, 3H, *J* = 6.8 Hz); <sup>13</sup>C NMR (125 MHz, CDCl<sub>3</sub>) δ 86.7, 32.1, 30.4, 21.9, 17.3, 16.9, 13.6, 11.8; IR (neat, cm<sup>-1</sup>) 2946, 2868, 2278; MS (APCI) Calculated for [C<sub>15</sub>H<sub>31</sub>OSi]<sup>+</sup>: 255.48; Found: 255.0.

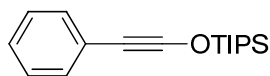

The above siloxy alkyne was prepared in 85% yield according to the general procedure A. <sup>1</sup>H NMR (500 MHz, CDCl<sub>3</sub>) δ 7.32-7.30 (m, 2H), 7.25-7.22 (m, 2H), 7.19-7.15 (m, 1H), 1.38-1.32 (m, 3H), 1.18 (d, 18H, *J* = 7.5 Hz); <sup>13</sup>C NMR (125 MHz, CDCl<sub>3</sub>) δ 131.4, 128.1, 125.9, 125.2, 96.8, 33.5, 17.3, 11.9; IR (neat, cm<sup>-1</sup>)

2946, 2868, 2266; MS (APCI) Calculated for  $[C_{18}H_{31}OSi]^+$  307.52;  $[M^+ + MeOH + H]$ : 307.52; Found: 307.2.

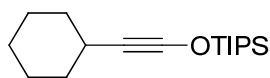

The above siloxy alkyne was prepared in 91% yield according to the general procedure A.  $^1H$  NMR (500 MHz,  $CDCl_3$ )  $\delta$  2.28-2.24 (m, 1H), 1.74-1.67 (m, 2H), 1.67-1.64 (m, 2H), 1.47 (m, 1H), 1.34-1.21 (m, 8H), 1.12 (d, 18H,  $J = 7.0$  Hz);  $^{13}C$  NMR (125 MHz,  $CDCl_3$ )  $\delta$  87.2, 35.1, 34.0, 28.0, 26.1, 25.1, 17.4, 11.8; IR (neat,  $cm^{-1}$ ) 2293, 2868, 2274, 2076, 1464; MS (APCI) Calculated for  $[C_{17}H_{33}OSi]^+$ : 281.23; Found: 281.1.

### General Procedure B: AgNTf<sub>2</sub>-Catalyzed Aldehyde Olefination

A solution of siloxy alkyne (0.20 mmol) and aldehyde (0.22 mmol) in  $CH_2Cl_2$  (4 mL) was cooled to  $-78$  °C under inert nitrogen atmosphere and treated with AgNTf<sub>2</sub> (3.9 mg, 0.01 mmol). The reaction mixture was stirred at the same temperature for 30 min. The reaction was allowed to warm to room temperature and stirred for another 30 min. The solvent was removed under reduced pressure. Crude product was purified directly by silica gel column chromatography to afford the requisite olefination product.

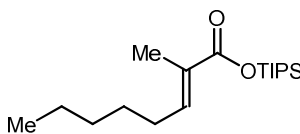

**6**

**Ester 6** was prepared in 87% yield according to the general procedure B.  $^1H$  NMR (500 Hz,  $CDCl_3$ )  $\delta$  6.81 (t, 1H,  $J = 7.5$  Hz), 2.17 (m, 2H), 1.82 (s, 3H), 1.45-1.25 (m, 9H), 1.08 (d, 18H,  $J = 7.5$  Hz), 0.89 (t, 3H,  $J = 7.0$  Hz);  $^{13}C$  NMR (125 Hz,  $CDCl_3$ )  $\delta$  168.1, 143.4, 128.6, 31.5, 28.8, 28.3, 22.5, 17.8, 14.0, 12.6, 12.0; IR (neat,  $cm^{-1}$ ) 2945, 2868, 1691, 1646, 1465; MS (EI) Found: 313.2.

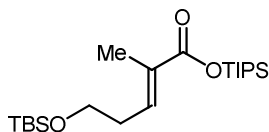

**7**

**Ester 7** was prepared in 75% yield according to the general procedure B.  $^1\text{H}$  NMR (500 Hz,  $\text{CDCl}_3$ )  $\delta$  6.84 (t, 1H,  $J = 7.5$  Hz), 3.71 (t, 2H,  $J = 6.3$  Hz), 2.40 (m, 2H), 1.84 (s, 3H), 1.32 (m, 3H), 1.09 (d, 18H,  $J = 7.5$  Hz), 0.88 (s, 9H), 0.04 (s, 6H);  $^{13}\text{C}$  NMR (100 Hz,  $\text{CDCl}_3$ )  $\delta$  167.9, 139.6, 130.3, 61.7, 32.5, 25.9, 18.3, 17.9, 12.8, 12.0, -5.4; IR (neat,  $\text{cm}^{-1}$ ) 2948, 1692, 1650, 1464; MS (EI) Found: 401.2.

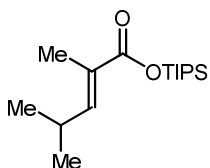

**8**

**Ester 8** was prepared in 87% yield according to the general procedure B.  $^1\text{H}$  NMR (500 Hz,  $\text{CDCl}_3$ )  $\delta$  6.61 (d, 1H,  $J = 9.5$  Hz), 2.62 (m, 1H), 1.84 (d, 3H,  $J = 4.5$  Hz), 1.30 (m, 3H), 1.09 (d, 3H,  $J = 7.5$  Hz), 1.02 (d, 6H,  $J = 6.5$  Hz);  $^{13}\text{C}$  NMR (125 Hz,  $\text{CDCl}_3$ )  $\delta$  168.4, 149.7, 126.6, 28.0, 22.0, 17.8, 12.5, 12.0; IR (neat,  $\text{cm}^{-1}$ ) 2961, 2869, 1693, 1646, 1465; MS (EI) Found: 285.1.

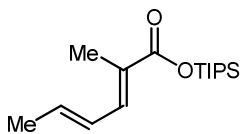

**9**

**Ester 9** was prepared in 75% yield according to the general procedure B.  $^1\text{H}$  NMR (500 Hz,  $\text{CDCl}_3$ )  $\delta$  7.19 (d, 1H,  $J = 11.5$  Hz), 6.37 (m, 1H), 6.08 (m, 1H), 1.92 (s, 3H), 1.87 (d, 3H,  $J = 6.5$  Hz), 1.35 (m, 3H), 1.09 (d, 18H,  $J = 7.5$  Hz);  $^{13}\text{C}$  NMR (100 Hz,  $\text{CDCl}_3$ )  $\delta$  168.5, 139.2, 137.7, 127.6, 126.0, 18.9, 17.8, 12.8, 12.0; IR (neat,  $\text{cm}^{-1}$ ) 3033, 2945, 2868, 1685, 1644, 1610; MS (EI) Found: 283.1.

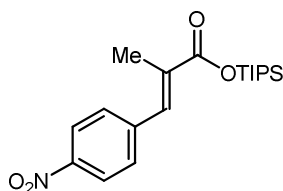

**10**

**Ester 10** was prepared in 84% yield according to the general procedure B.  $^1\text{H}$  NMR (500 Hz,  $\text{CDCl}_3$ )  $\delta$  8.25 (d, 2H,  $J = 8.5$  Hz), 7.72 (s, 1H), 7.54 (d, 2H,  $J = 8.5$  Hz), 2.13 (d, 3H,  $J = 1.5$  Hz), 1.39 (m, 3H), 1.13 (d, 18H,  $J = 7.5$  Hz);  $^{13}\text{C}$  NMR (125 Hz,  $\text{CDCl}_3$ )  $\delta$  167.5, 147.1, 142.6, 136.5, 133.4, 130.2, 123.6, 17.8, 14.5, 12.0; IR (neat,  $\text{cm}^{-1}$ ) 3080, 2946, 2868, 1692, 1597; MS (EI) Found: 364.1.

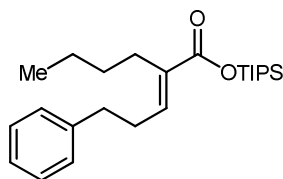

**11**

**Ester 11** was prepared in 85% yield according to the general procedure B.  $^1\text{H}$  NMR (500 Hz,  $\text{CDCl}_3$ )  $\delta$  7.30-7.26 (m, 2H), 7.21-7.18 (m, 3H), 6.82 (t, 1H,  $J = 7.5$  Hz), 2.76 (t, 2H,  $J = 7.5$  Hz), 2.53-2.48 (m, 2H), 2.24 (t, 2H,  $J = 7.5$  Hz), 1.36-1.26 (m, 7H), 1.09 (d, 18H,  $J = 7.5$  Hz), 0.88 (t, 3H,  $J = 7.0$  Hz);  $^{13}\text{C}$  NMR (125 Hz,  $\text{CDCl}_3$ )  $\delta$  167.7, 141.8, 141.2, 134.2, 128.4, 126.1, 35.1, 31.5, 30.7, 26.8, 22.7, 17.8, 14.0, 12.0; IR (neat,  $\text{cm}^{-1}$ ) 3064, 2956, 1693, 1642, 1604, 1496; MS (EI) Found: 389.2.

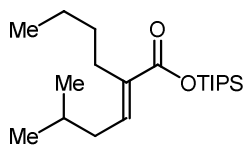

**12**

**Ester 12** was prepared in 93% yield according to the general procedure B.  $^1\text{H}$  NMR (500 Hz,  $\text{CDCl}_3$ )  $\delta$  6.82 (t, 1H,  $J = 7.5$  Hz), 2.28 (t, 2H,  $J = 7.3$  Hz), 2.07 (t, 2H,  $J = 7.3$  Hz), 1.77-1.71 (m, 1H), 1.38-1.30 (m, 7H), 1.09 (d, 18H,  $J = 7.5$  Hz), 0.94 (d, 6H,  $J = 7.0$  Hz), 0.90 (t, 3H,  $J = 7.0$  Hz);  $^{13}\text{C}$  NMR (125 Hz,  $\text{CDCl}_3$ )  $\delta$

168.9, 142.2, 134.1, 37.6, 31.6, 28.4, 26.9, 22.8, 22.5, 17.9, 14.0, 12.0; IR (neat,  $\text{cm}^{-1}$ ) 2956, 2869, 1692, 1641, 1465; MS (EI) Found: 341.3.

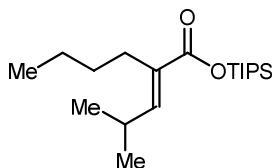

**13**

**Ester 13** was prepared in 94% yield according to the general procedure B.  $^1\text{H}$  NMR (500 Hz,  $\text{CDCl}_3$ )  $\delta$  6.58 (d, 1H,  $J = 10$  Hz), 2.65-2.61 (m, 1H), 2.28 (t, 2H,  $J = 7.8$  Hz), 1.40-1.29 (m, 7H), 1.09 (d, 18H,  $J = 7.5$  Hz), 1.02 (d, 6H,  $J = 6.5$  Hz), 0.90 (t, 3H,  $J = 7.3$  Hz);  $^{13}\text{C}$  NMR (125 Hz,  $\text{CDCl}_3$ )  $\delta$  168.2, 149.7, 131.3, 32.1, 27.9, 27.0, 22.8, 22.4, 17.9, 13.4, 12.0; IR (neat,  $\text{cm}^{-1}$ ) 2959, 2869, 1692, 1642, 1465; MS (EI) Found: 327.2.

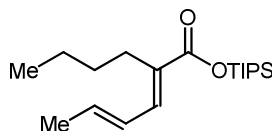

**14**

**Ester 14** was prepared in 66% yield according to the general procedure B.  $^1\text{H}$  NMR (500 Hz,  $\text{CDCl}_3$ )  $\delta$  7.18 (d, 1H,  $J = 11.5$  Hz), 6.39-6.33 (m, 1H), 6.12-6.05 (m, 1H), 2.38 (t, 2H,  $J = 7.5$  Hz), 1.87 (dd, 3H,  $J_1 = 7.0$  Hz,  $J_2 = 1.5$  Hz), 1.44-1.25 (m, 7H), 1.09 (d, 18H,  $J = 7.5$  Hz), 0.91 (t, 3H,  $J = 7.0$  Hz);  $^{13}\text{C}$  NMR (125 Hz,  $\text{CDCl}_3$ )  $\delta$  168.3, 139.3, 137.8, 131.1, 127.5, 32.0, 27.0, 22.7, 18.9, 17.9, 14.0, 12.0; IR (neat,  $\text{cm}^{-1}$ ) 3032, 2946, 2868, 1685, 1642, 1605, 1465; MS (EI) Found: 325.2.

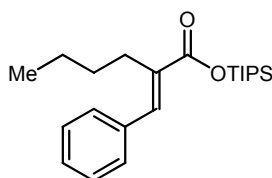

**15**

**Ester 15** was prepared in 73% yield according to the general procedure B.  $^1\text{H}$  NMR (500 Hz,  $\text{CDCl}_3$ )  $\delta$  7.71 (s, 1H), 7.41-7.37 (m, 4H), 7.34-7.31 (m, 1H), 2.55-2.51 (m, 2H), 1.59-1.53 (m, 2H), 1.43-1.35 (m, 5H), 1.44 (d, 18H,  $J = 7.5$  Hz),

0.92 (t, 3H,  $J = 7.0$  Hz);  $^{13}\text{C}$  NMR (125 Hz,  $\text{CDCl}_3$ )  $\delta$  168.3, 139.2, 136.0, 134.9, 129.3, 128.4, 128.2, 31.5, 27.6, 22.9, 17.9, 13.9, 12.0; IR (neat,  $\text{cm}^{-1}$ ) 2946, 2868, 1690, 1627, 1465; MS (EI) Found: 361.1.

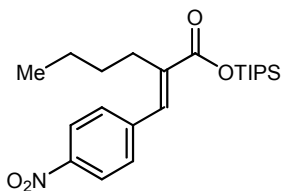

**16**

**Ester 16** was prepared in 84% yield according to the general procedure B.  $^1\text{H}$  NMR (500 Hz,  $\text{CDCl}_3$ )  $\delta$  8.24 (d, 2H,  $J = 8.5$  Hz), 7.68 (s, 1H), 7.49 (d, 2H,  $J = 8.5$  Hz), 2.49 (t, 2H,  $J = 8.0$  Hz), 1.55-1.51 (m, 2H), 1.42-1.34 (m, 5H), 1.12 (d, 18H,  $J = 7.5$  Hz), 0.88 (t, 3H,  $J = 7.3$  Hz);  $^{13}\text{C}$  NMR (125 Hz,  $\text{CDCl}_3$ )  $\delta$  167.4, 147.1, 142.7, 138.4, 136.3, 129.8, 123.7, 31.4, 27.7, 22.8, 17.8, 13.8, 12.0; IR (neat,  $\text{cm}^{-1}$ ) 3079, 2947, 2868, 1694, 1597, 1522; MS (EI) Found: 406.1.

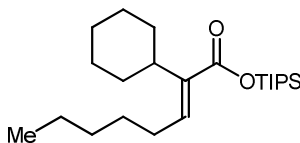

**17**

**Ester 17** was prepared in 72% yield according to the general procedure B.  $^1\text{H}$  NMR (400 Hz,  $\text{CDCl}_3$ )  $\delta$  6.69 (t, 1H,  $J = 7.5$  Hz), 2.40-2.19 (m, 2H), 2.20 (m, 1H), 2.19 (m, 5H), 1.50-1.21 (m, 13H), 1.09 (d, 18H,  $J = 7.5$  Hz), 0.88 (t, 3H,  $J = 7.0$  Hz);  $^{13}\text{C}$  NMR (125 Hz,  $\text{CDCl}_3$ )  $\delta$  168.7, 167.9, 142.7, 138.9, 138.0, 137.8, 41.3, 38.5, 32.8, 31.5, 30.5, 29.6, 29.5, 28.8, 28.2, 27.0, 26.8, 26.2, 25.9, 22.6, 22.5, 17.9, 14.0, 12.1; IR (neat,  $\text{cm}^{-1}$ ) 2927, 2867, 1691, 1465; MS (EI) Found: 381.2.

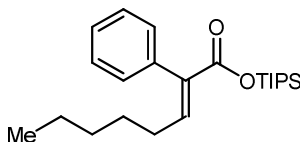

**18**

**Ester 18** was prepared in 76% yield according to the general procedure B.  $^1\text{H}$  NMR (500 Hz,  $\text{CDCl}_3$ )  $\delta$  7.35-7.32 (m, 2H), 7.28-7.25 (m, 1H), 7.15-7.13 (m, 2H), 7.09 (t, 1H,  $J = 7.5$  Hz), 2.07 (m, 2H), 1.42-1.21 (m, 9H), 1.02 (d, 18H,  $J = 7.5$



Hz), 0.84 (t, 3H,  $J = 7.0$  Hz);  $^{13}\text{C}$  NMR (125 Hz,  $\text{CDCl}_3$ )  $\delta$  166.8, 145.8, 136.1, 135.0, 129.6, 127.8, 127.1, 31.4, 29.6, 28.5, 22.4, 17.7, 13.9, 11.9; IR (neat,  $\text{cm}^{-1}$ ) 2945, 2868, 1697, 1637, 1465; MS (EI) Found: 375.2.

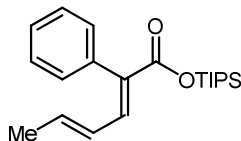

**19**

**Ester 19** was prepared in 76% yield according to the general procedure B.  $^1\text{H}$  NMR (500 Hz,  $\text{CDCl}_3$ )  $\delta$  7.46 (d, 1H,  $J = 10.0$  Hz), 7.38-7.35 (m, 2H), 7.31-7.30 (m, 1H), 7.22-7.20 (m, 2H), 6.19-6.12 (m, 2H), 1.79 (d, 3H,  $J = 6.5$  Hz), 1.31-1.25 (m, 3H), 1.05 (d, 18H,  $J = 7.5$  Hz);  $^{13}\text{C}$  NMR (100 Hz,  $\text{CDCl}_3$ )  $\delta$  167.2, 141.3, 139.6, 135.9, 131.7, 130.1, 128.4, 127.8, 127.2, 18.8, 17.7, 11.9; IR (neat,  $\text{cm}^{-1}$ ) 2945, 2867, 1690, 1637, 1465; MS (EI) Found: 345.2.

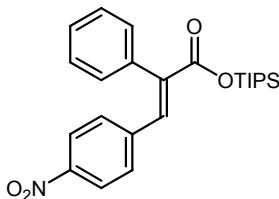

**20**

**Ester 20** was prepared in 69% yield according to the general procedure B.  $^1\text{H}$  NMR (500 Hz,  $\text{CDCl}_3$ )  $\delta$  8.01 (d, 2H,  $J = 9.0$  Hz), 7.87 (s, 1H), 7.37-7.35 (m, 3H), 7.21-7.17 (m, 4H), 1.35-1.29 (m, 3H), 1.04 (d, 18H,  $J = 7.5$  Hz);  $^{13}\text{C}$  NMR (100 Hz,  $\text{CDCl}_3$ )  $\delta$  166.6, 147.3, 141.3, 137.5, 135.4, 131.0, 129.3, 128.8, 128.2, 123.3, 17.7, 11.8; IR (neat,  $\text{cm}^{-1}$ ) 3060, 2945, 2867, 1695, 1595, 1522; MS (EI) Found: 426.1.

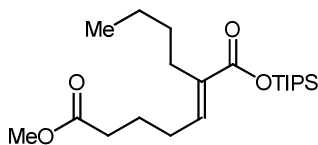

**23**

**Diester 23** was prepared in 80% yield according to the general procedure B.  $^1\text{H}$  NMR (500 Hz,  $\text{CDCl}_3$ )  $\delta$  6.73 (t, 1H,  $J = 7.5$  Hz), 3.67 (s, 3H), 2.34 (t, 2H,  $J = 7.5$  Hz), 2.28-2.20 (m, 4H), 1.79-1.76 (m, 2H), 1.36-1.29 (m, 7H), 1.07 (d, 18H,  $J =$

7.5 Hz), 0.88 (t, 3H,  $J = 7.0$  Hz);  $^{13}\text{C}$  NMR (125 Hz,  $\text{CDCl}_3$ )  $\delta$  173.6, 167.7, 141.5, 134.6, 51.5, 33.5, 31.6, 27.9, 26.9, 24.1, 22.8, 17.9, 14.0, 12.0; IR (neat,  $\text{cm}^{-1}$ ) 2956, 2868, 1743, 1693, 1642; MS (EI) Found: 385.6.

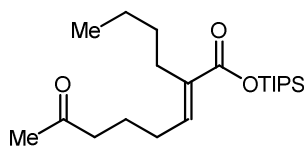

**24**

**Ester 24** was prepared in 76% yield according to the general procedure B.  $^1\text{H}$  NMR (400 Hz,  $\text{CDCl}_3$ )  $\delta$  6.75 (t, 1H,  $J = 7.5$  Hz), 2.44 (t, 2H,  $J = 9.2$  Hz), 2.27 (t, 2H,  $J = 9.2$  Hz), 2.21-2.15 (m, 2H), 2.13 (s, 3H), 1.63-1.57 (m, 2H), 1.47-1.28 (m, 9H), 1.07 (d, 18H,  $J = 7.5$  Hz), 0.89 (t, 3H,  $J = 8.7$  Hz);  $^{13}\text{C}$  NMR (100 Hz,  $\text{CDCl}_3$ )  $\delta$  208.8, 167.8, 142.5, 133.9, 43.5, 31.6, 28.5, 28.4, 26.9, 23.5, 22.8, 17.8, 17.7, 14.0, 12.0; IR (neat,  $\text{cm}^{-1}$ ) 2945, 2867, 1719, 1690, 1641, 1465; MS (EI) Found: 383.3.

ppm

Integral

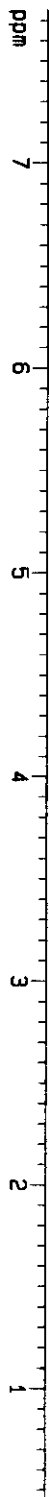

OTPS  
Me

- 1.660
- 1.652
- 1.272
- 1.256
- 1.241
- 1.230
- 1.226
- 1.218
- 1.212
- 1.198
- 1.116
- 1.109
- 1.101
- 1.081
- 1.046

3.000  
3.425  
18.155

Current Data Parameters  
NAME TIPSO-propyne  
EXPNO 5  
PROCNO 1

F2 - Acquisition Parameters  
Date\_ 20051220  
Time 10.55  
INSTRUM spect  
PROBHD 5 mm QNP 1H  
PULPROG zg  
TD 32768  
SOLVENT CDCl3  
NS 4  
DS 0  
SMH 5208.333 Hz  
FIDRES 0.158946 Hz  
AQ 3.1457779 sec  
RG 16  
DM 96.000 usec  
DE 4.50 usec  
TE 300.0 K  
D1 10.00000000 sec

==== CHANNEL f1 =====  
NUC1 1H  
P1 10.00 usec  
PL1 0.00 dB  
SF01 500.1320118 MHz

F2 - Processing parameters  
SI 16384  
SF 500.1300123 MHz  
WDW EM  
SSB 0  
LB 0.30 Hz  
GB 0  
PC 1.00

1D NMR plot parameters  
CX 20.00 cm  
F1P 7.756 ppm  
F1 3879.05 Hz  
F2P 0.455 ppm  
F2 227.56 Hz  
PPMCH 0.36505 ppm/cm  
HZCH 182.57472 Hz/cm

ppm

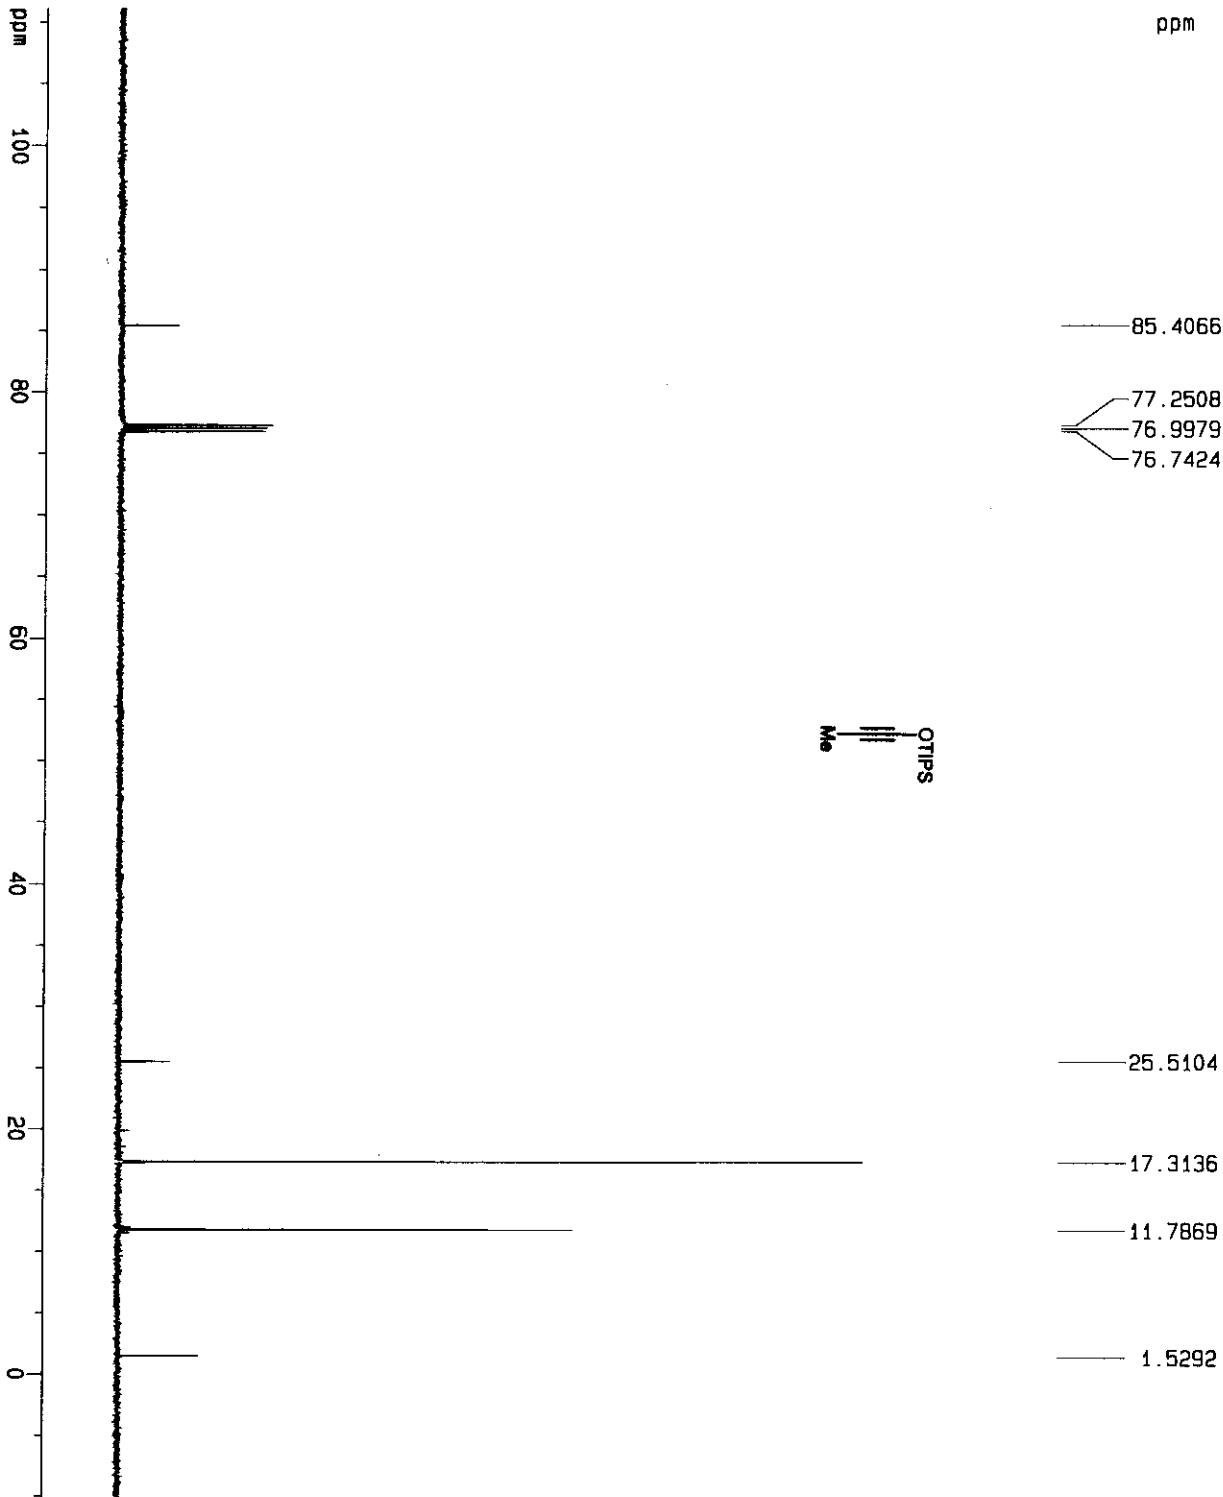

Current Data Parameters  
 NAME TIP50-propyne  
 EXPNO 4  
 PROCNO 1

F2 - Acquisition Parameters  
 Date\_ 20051220  
 Time 10.52  
 INSTRUM spect  
 PROBHD 5 mm QNP 1H  
 PULPROG zgdc  
 TD 238090  
 SOLVENT Aceton  
 NS 12  
 DS 0  
 SMH 39682.539 Hz  
 FIDRES 0.166670 Hz  
 AQ 2.9999840 sec  
 RG 8192  
 DM 12.600 usec  
 DE 7.50 usec  
 TE 300.0 K  
 D1 4.00000000 sec  
 d11 0.03000000 sec

\*\*\*\*\* CHANNEL f1 \*\*\*\*\*  
 NUC1 13C  
 P1 8.20 usec  
 PL1 0.00 dB  
 SFO1 125.7736214 MHz

\*\*\*\*\* CHANNEL f2 \*\*\*\*\*  
 CPDPRG2 waltz16  
 NUC2 1H  
 PCPD2 90.00 usec  
 PL2 120.00 dB  
 PL12 19.00 dB  
 SFO2 500.1338000 MHz

F2 - Processing parameters  
 SI 32768  
 SF 125.7577982 MHz  
 MDW EM  
 SSB 0  
 LB 1.00 Hz  
 GB 0  
 PC 1.40

1D NMR plot parameters  
 CK 20.00 cm  
 F1P 111.123 ppm  
 F1 13974.52 Hz  
 F2P -10.295 ppm  
 F2 -1294.63 Hz  
 PPKCM 5.07086 ppm/cm  
 HZCM 763.45758 Hz/cm

ppm

ppm

Integral

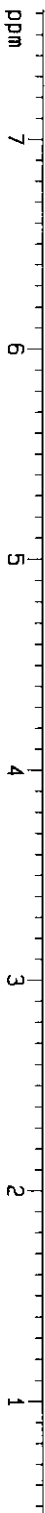

- 2.061
- 2.050
- 2.036
- 1.398
- 1.394
- 1.386
- 1.381
- 1.374
- 1.256
- 1.241
- 1.226
- 1.117
- 1.102
- 0.885
- 0.873
- 0.871
- 0.858

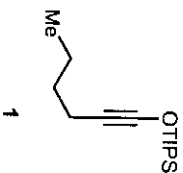

Current Data Parameters  
 NAME TIPSO-hexy-924  
 EXPNO 1  
 PROCNO 1

F2 - Acquisition Parameters  
 Date\_ 20050925  
 Time 20.43

INSTRUM spect

PROBHD 5 mm QNP 1H

PULPROG zg

TD 32768

SOLVENT CDCl3

NS 4

DS 0

SMH 5208.333 Hz

FIDRES 0.158946 Hz

AQ 3.1457779 sec

RG 8

DW 96.000 usec

DE 4.50 usec

TE 300.0 K

D1 2.00000000 sec

==== CHANNEL f1 =====

NUC1 1H  
 P1 10.00 usec  
 PL1 0.00 dB  
 SF01 500.1320118 MHz

F2 - Processing parameters

SI 16384  
 SF 500.1300132 MHz  
 NDM EM  
 SSB 0  
 LB 0.30 Hz  
 GB 0  
 PC 1.00

1D NMR plot parameters

CX 20.00 cm  
 F1P 7.620 ppm  
 F1 3810.89 Hz  
 F2P 0.450 ppm  
 F2 225.28 Hz  
 PPMCM 0.35847 ppm/cm  
 HZCM 179.28041 Hz/cm

ppm

ppm

100

80

60

40

20

86.6584

77.2592

77.0044

76.7501

32.0854

30.4279

21.8715

17.3151

16.8630

13.5902

11.8160

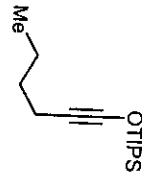

Current Data Parameters  
 NAME TIPSD-hexy-924  
 EXPNO 2  
 PROCNO 1

F2 - Acquisition Parameters

Date\_ 20050925  
 Time 20.46  
 INSTRUM spect  
 PROHD 5 mm QNP 1H  
 PULPROG zgdc  
 T0 238090  
 SOLVENT Aceton  
 NS 18  
 DS 0  
 SMH 39682.539 Hz  
 FIDRES 0.166670 Hz  
 AQ 2.9999840 sec  
 RG 4096  
 DM 12.600 usec  
 DE 7.50 usec  
 TE 300.0 K  
 D1 4.00000000 sec  
 d11 0.03000000 sec

\*\*\*\*\* CHANNEL f1 \*\*\*\*\*  
 NUC1 13C  
 P1 8.20 usec  
 PL1 0.00 dB  
 SF01 125.7736214 MHz

\*\*\*\*\* CHANNEL f2 \*\*\*\*\*  
 CPDPRG2 waltz16  
 NUC2 1H  
 P2 90.00 usec  
 PL2 120.00 dB  
 PL12 19.00 dB  
 SF02 500.1339800 MHz

F2 - Processing parameters  
 SI 32768  
 SF 125.7577898 MHz  
 WDM EM  
 SSB 0  
 LB 1.00 Hz  
 GB 0  
 PC 1.40

1D NMR plot parameters  
 CX 20.00 cm  
 F1P 111.701 ppm  
 F1 14047.23 Hz  
 F2P -1.140 ppm  
 F2 -143.31 Hz  
 PPMCM 5.64201 ppm/cm  
 HZCM 709.52722 Hz/cm

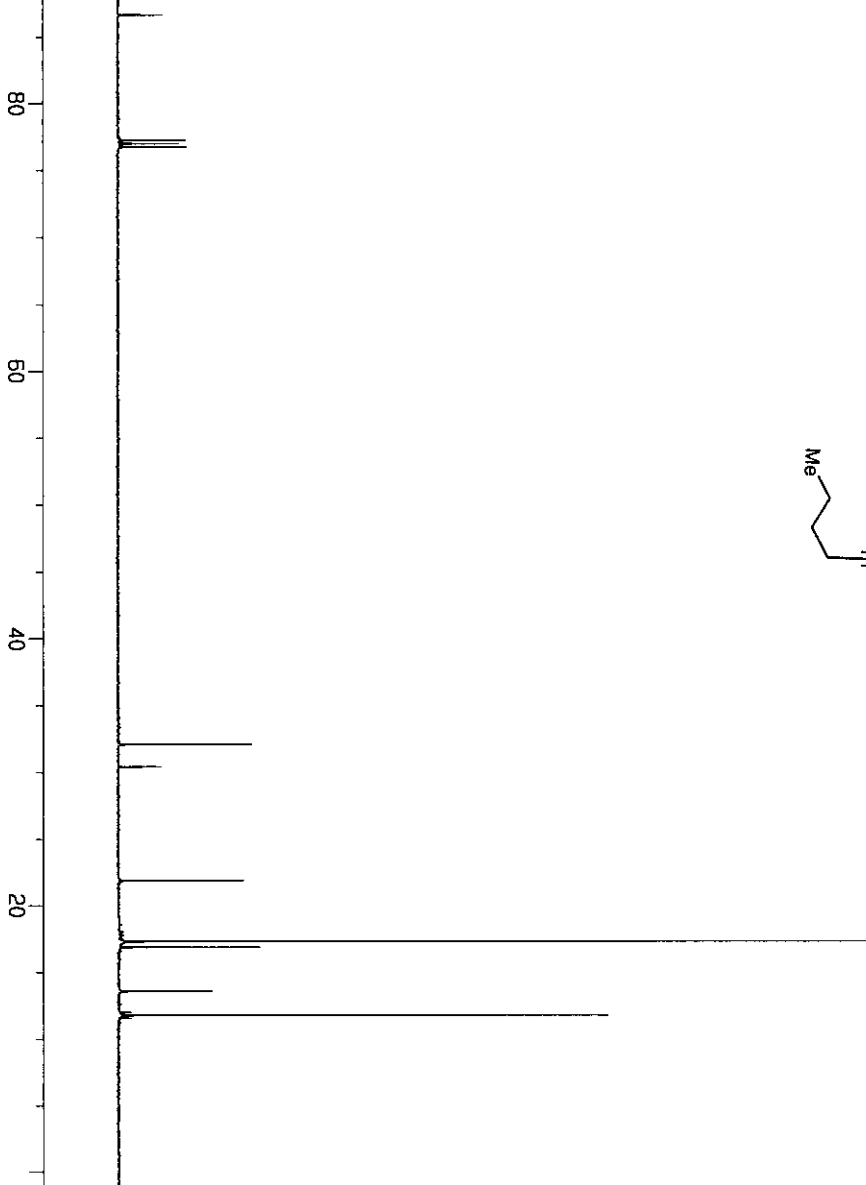

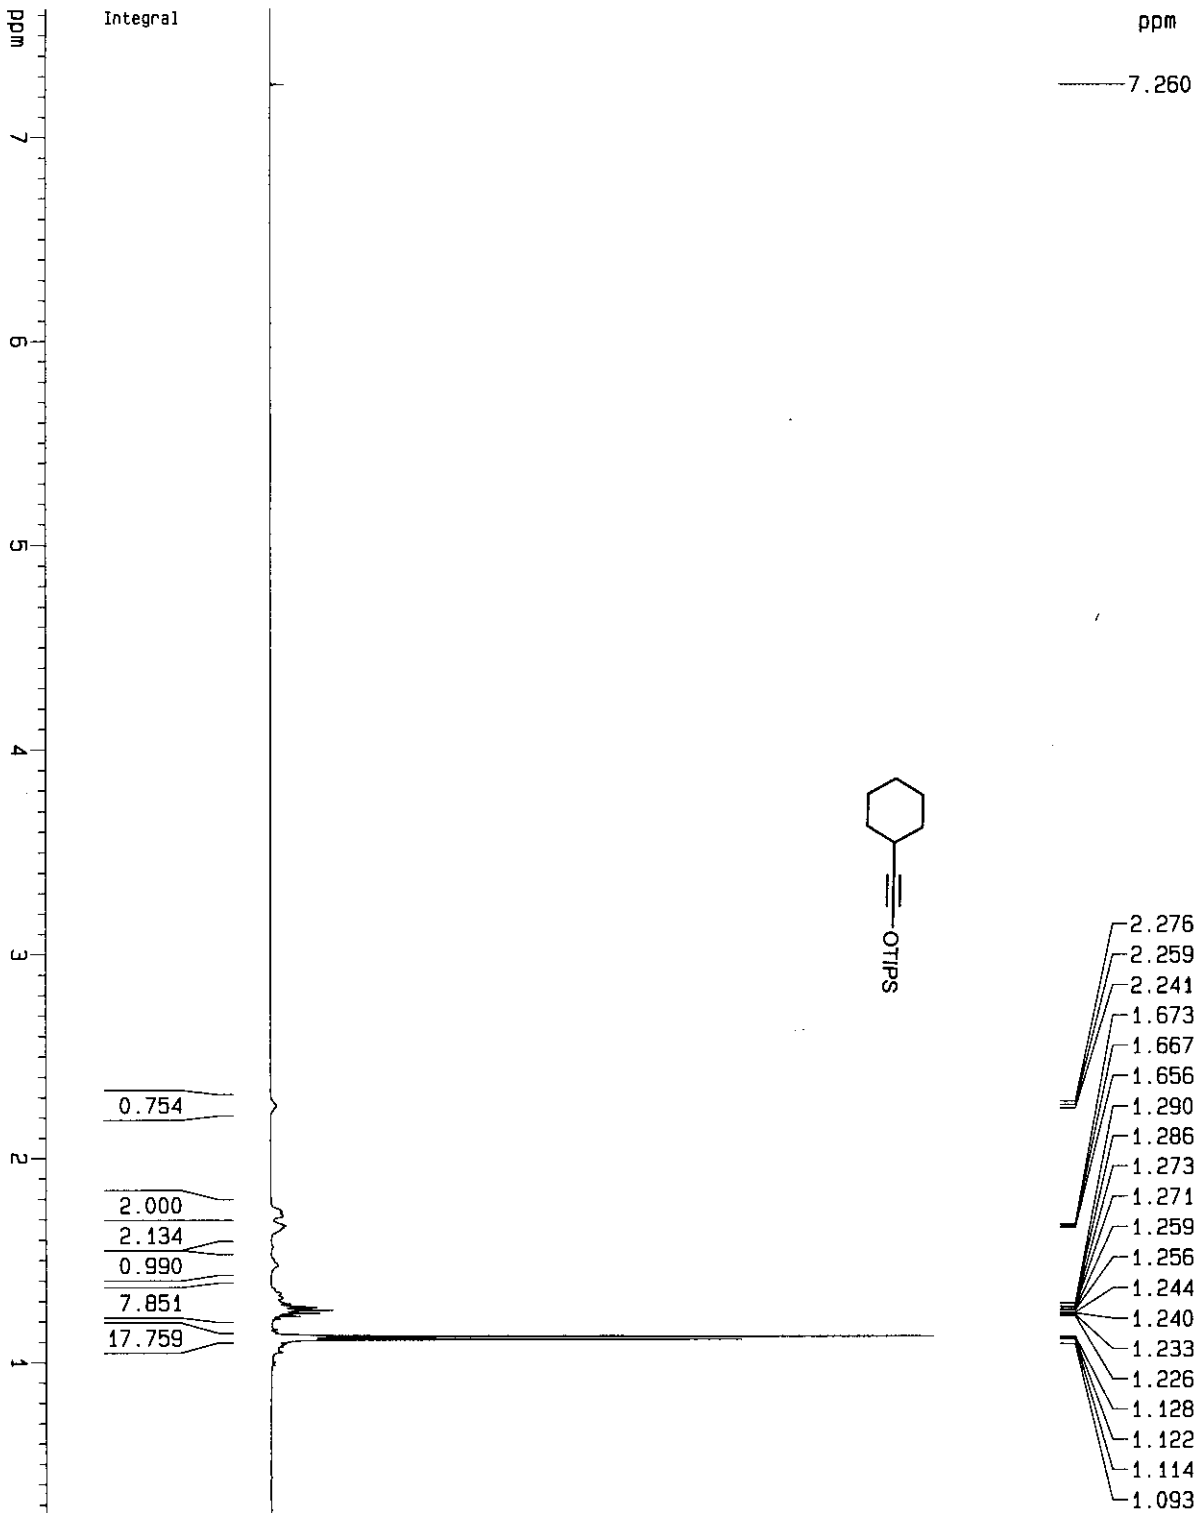

ppm  
7.260

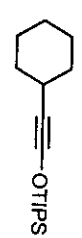

- 2.276
- 2.259
- 2.241
- 1.673
- 1.667
- 1.656
- 1.290
- 1.286
- 1.273
- 1.271
- 1.259
- 1.256
- 1.244
- 1.240
- 1.233
- 1.226
- 1.128
- 1.122
- 1.114
- 1.093

- 0.754
- 2.000
- 2.134
- 0.990
- 7.851
- 17.759

Current Data Parameters  
NAME TIPSD-Cy  
EXPNO 1  
PROCNO 1

F2 - Acquisition Parameters  
Date\_ 20050923  
Time 23.26  
INSTRUM spect  
PROBHD 5 mm QNP 1H  
PULPROG zg  
TD 32768  
SOLVENT CDCl3  
NS 4  
DS 0  
SMH 5208.333 Hz  
FIDRES 0.158946 Hz  
AQ 3.1457779 sec  
RG 32  
DM 96.000 usec  
DE 4.50 usec  
TE 300.0 K  
D1 2.00000000 sec

----- CHANNEL f1 -----  
NUC1 1H  
P1 10.00 usec  
PL1 0.00 dB  
SF01 500.1320118 MHz

F2 - Processing parameters  
S1 16384  
SF 500.1300129 MHz  
WDW EM  
SSB 0  
LB 0.30 Hz  
GB 0  
PC 1.00

1D NMR plot parameters  
CX 20.00 cm  
F1P 7.632 ppm  
F1 3816.79 Hz  
F2P 0.290 ppm  
F2 125.23 Hz  
PPMCM 0.36906 ppm/cm  
HZCM 184.57797 Hz/cm

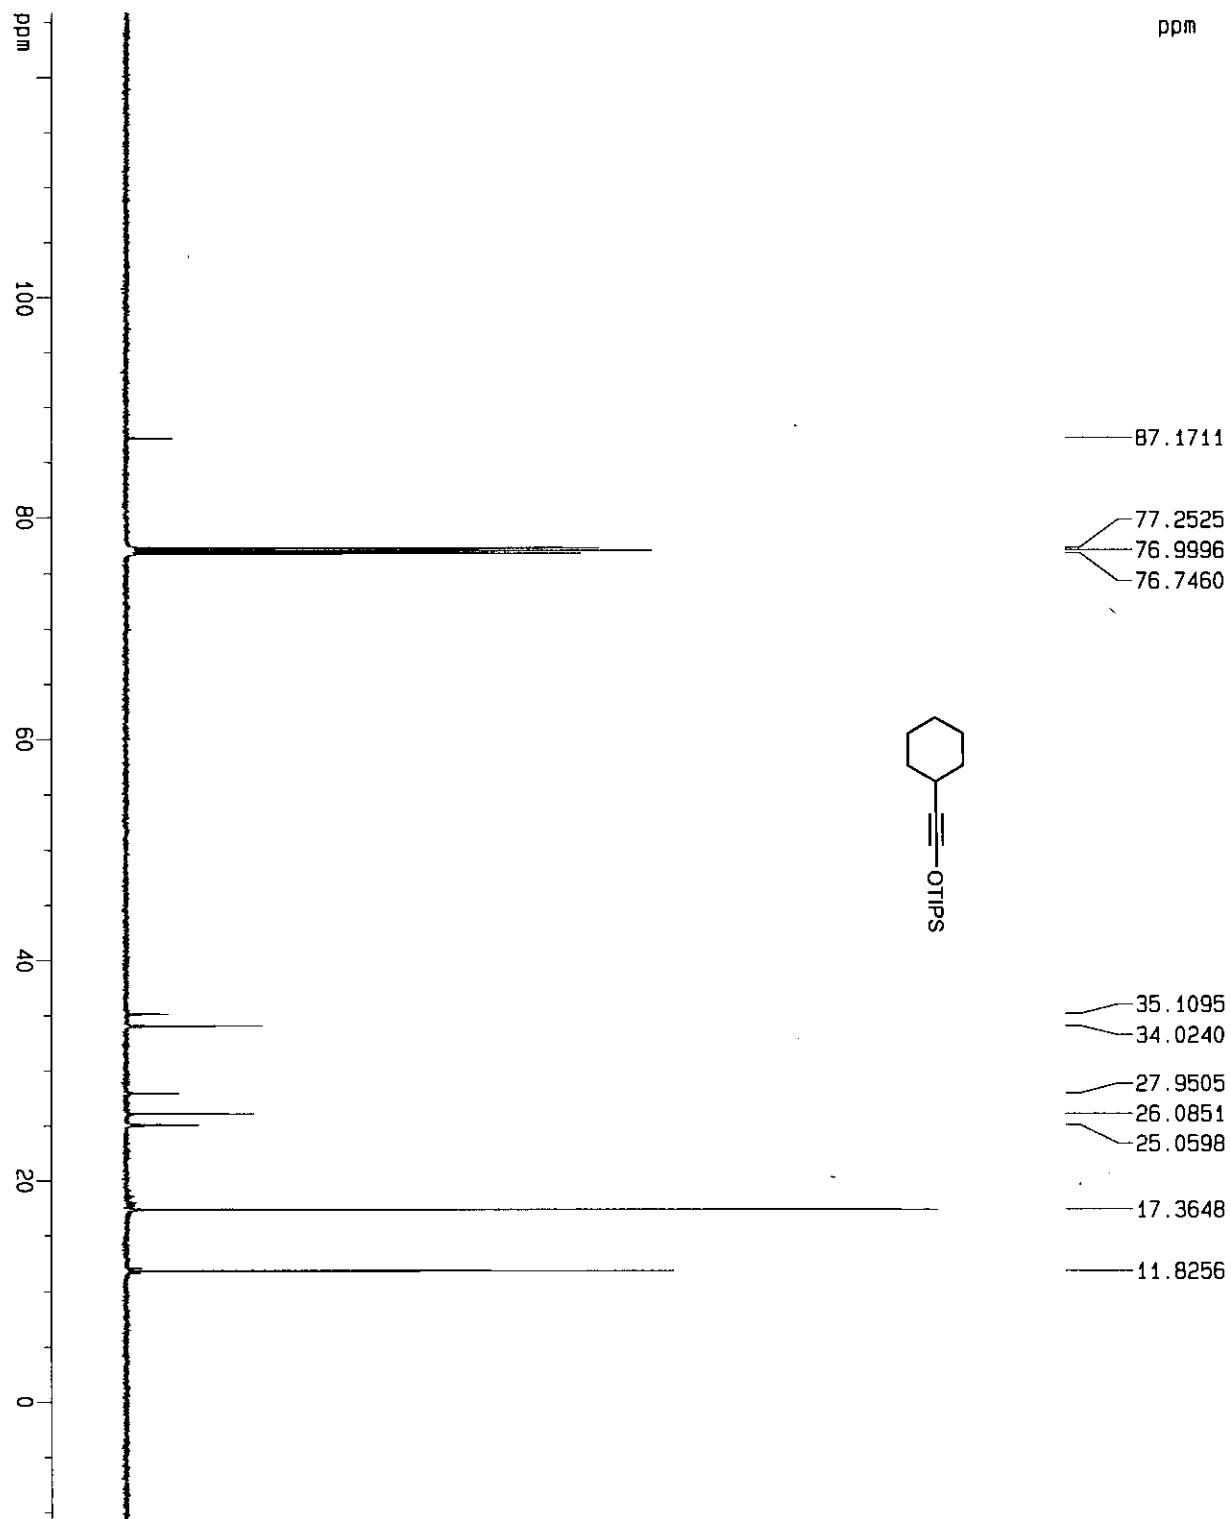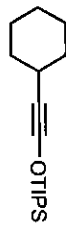

Current Data Parameters  
 NAME TIPSD-Cy  
 EXPNO 2  
 PROCNO 1

F2 - Acquisition Parameters  
 Date\_ 20050923  
 Time 23.31

INSTRUM spect  
 PROBD 5 mm GNP 1H  
 PULPROG zgpg30

TD 238090  
 SOLVENT Aceton  
 NS 203

DS 0  
 SMH 39682.539 Hz  
 FIDRES 0.166670 Hz

AQ 2.9999840 sec  
 RG 8192

DE 12.600 usec  
 TE 7.50 usec  
 D1 300.0 K

D1 4.00000000 sec  
 d11 0.03000000 sec

===== CHANNEL f1 =====  
 NUC1 13C  
 P1 8.20 usec  
 PL1 0.00 dB

SFO1 125.7736214 MHz

===== CHANNEL f2 =====  
 CPDPRG2 waltz16  
 NUC2 1H  
 PCPD2 90.00 usec

PL2 120.00 dB  
 PL12 19.00 dB  
 SF02 500.1338000 MHz

F2 - Processing Parameters  
 SI 32768  
 SF 125.7577922 MHz

WDW EM  
 SSB 0  
 LB 1.00 Hz

GB 0  
 PC 1.40

1D NMR plot parameters  
 CK 20.00 cm  
 F1P 125.871 dpm

F1 15829.25 Hz  
 F2P -10.519 ppm  
 F2 -1335.36 Hz

PPMCM 6.82447 dpm/cm  
 HZCM 856.23053 Hz/cm



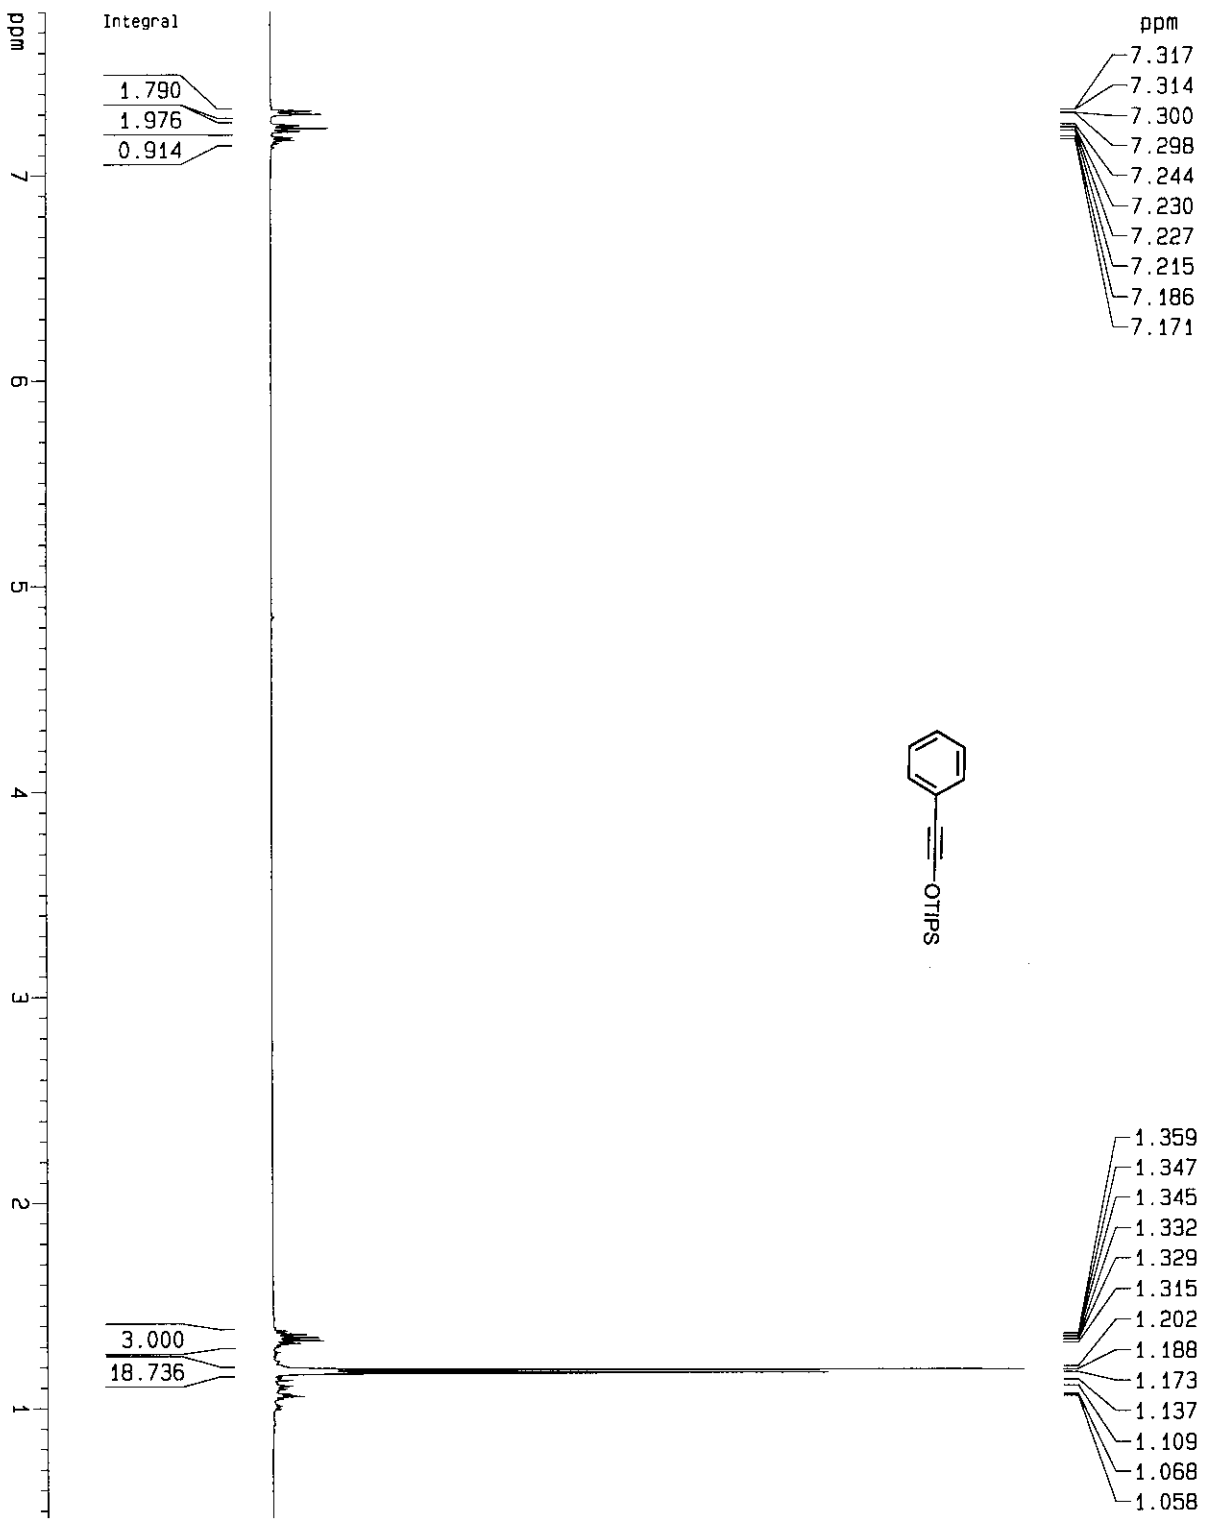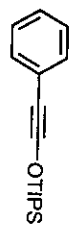

Current Data Parameters  
 NAME TIPSOpheacety1  
 EXPNO 1  
 PROCNO 1

F2 - Acquisition Parameters  
 Date\_ 20050808  
 Time 22.50  
 INSTRUM spect  
 PROBHD 5 mm QNP 1H  
 PULPROG zg  
 TD 32768  
 SOLVENT CDCl3  
 NS 4  
 DS 0  
 SWH 5208.333 Hz  
 FIDRES 0.158946 Hz  
 AQ 3.1457779 sec  
 RG 32  
 DM 96.000 usec  
 DE 4.50 usec  
 TE 300.0 K  
 D1 2.00000000 sec

===== CHANNEL f1 =====  
 NUC1 1H  
 P1 10.00 usec  
 PL1 0.00 dB  
 SF01 500.1320118 MHz

F2 - Processing parameters  
 SI 16384  
 SF 500.1300181 MHz  
 WDW EM  
 SSB 0  
 LB 0.30 Hz  
 GB 0  
 PC 1.00

ID NMR plot parameters  
 CX 20.00 cm  
 F1P 7.801 ppm  
 F1 3901.56 Hz  
 F2P 0.466 ppm  
 F2 233.08 Hz  
 PPMQCM 0.36675 ppm/cm  
 HZCM 183.42390 Hz/cm

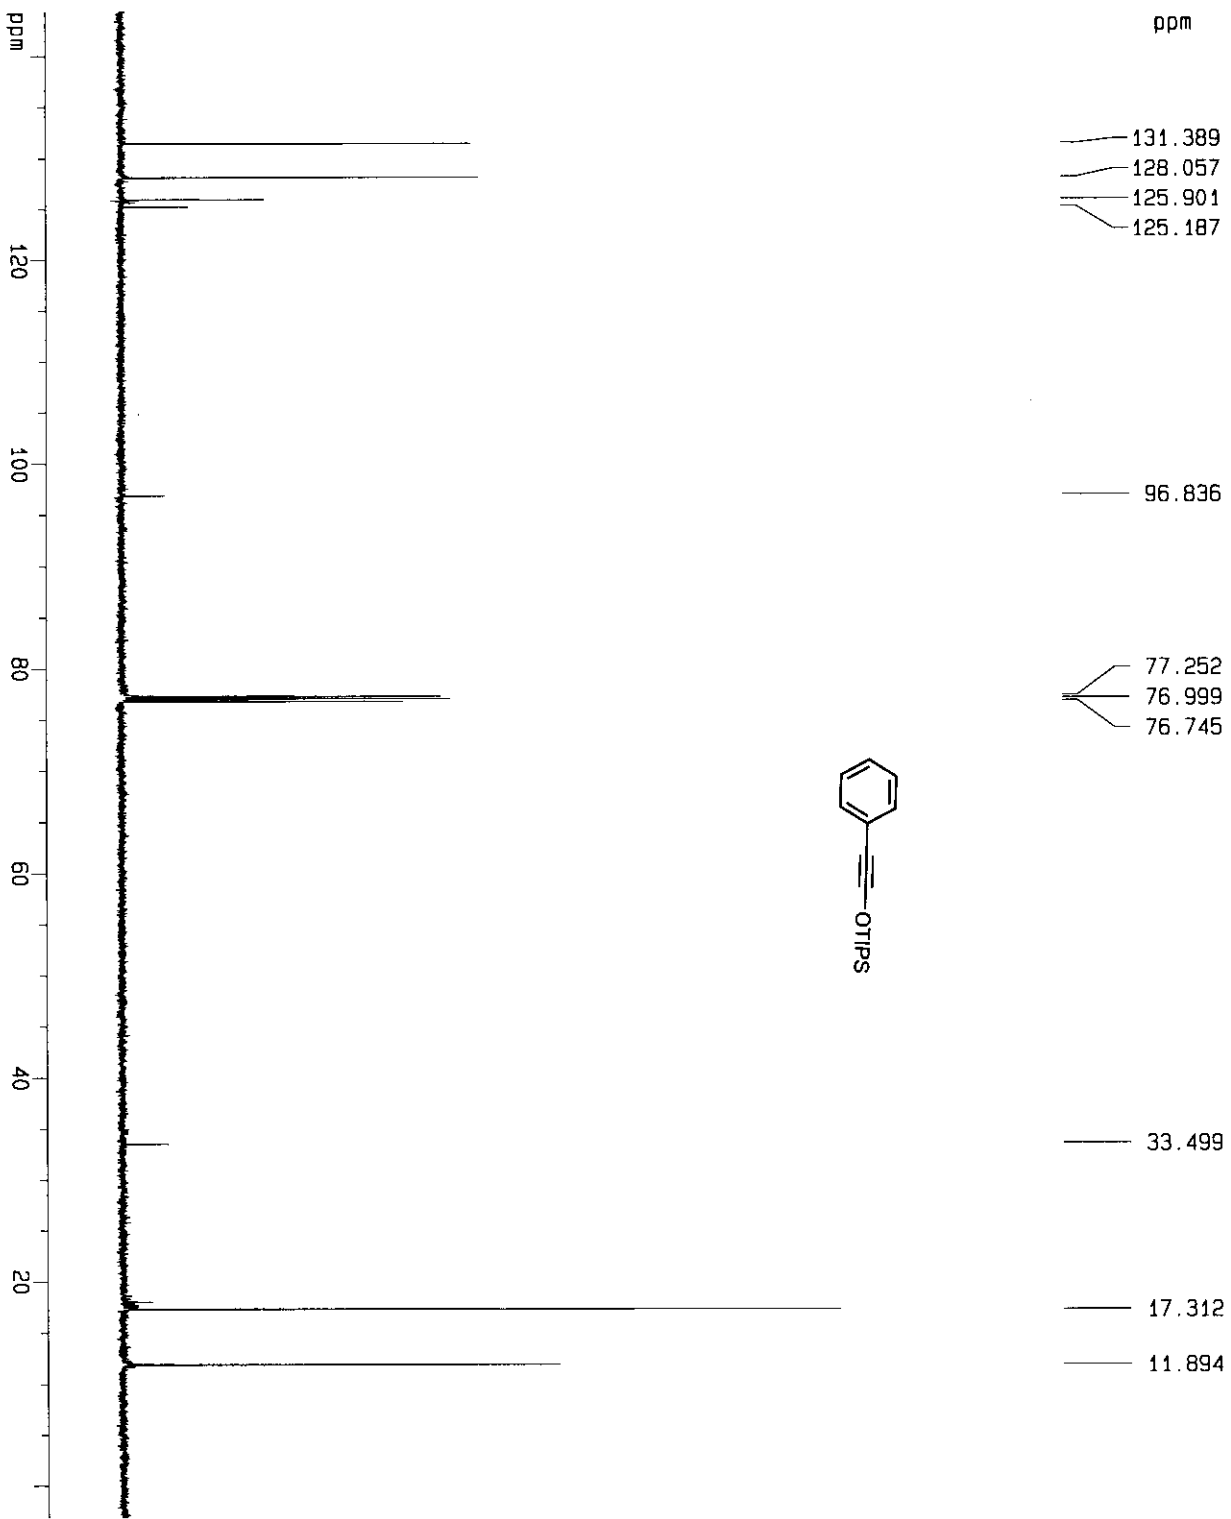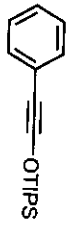

Current Data Parameters  
 NAME TIPSophaecety1  
 EXPNO 2  
 PROCNO 1

F2 - Acquisition Parameters  
 Date\_ 20050808  
 Time 22.56

INSTRUM spect  
 PROBDI 5 mm QNP 1H  
 PULPROG zgpg30

TD 238090  
 SOLVENT Aceton  
 NS 35

OS 0  
 SMH 39682.539 Hz  
 FIDRES 0.166670 Hz

AQ 2.9999840 sec  
 RG 2048

DE 12.600 usec  
 TE 7.50 usec  
 D1 300.0 K

D1 4.00000000 sec  
 D11 0.03000000 sec

===== CHANNEL f1 =====  
 NUC1 13C  
 P1 8.20 usec  
 PL1 0.00 dB

SF01 125.7736214 MHz

===== CHANNEL f2 =====  
 CPDPRG2 waltz16  
 NUC2 1H  
 PCPD2 90.00 usec

PL2 120.00 dB  
 PL12 19.00 dB

SF02 500.1338000 MHz

F2 - Processing parameters  
 SI 32768  
 SF 125.7577946 MHz

WDW EM  
 SSB 0  
 LB 1.00 Hz

GB 0  
 PC 1.40

1D NMR plot parameters  
 CX 20.00 cm  
 F1P 144.373 ppm

F1 18156.03 Hz  
 F2P -3.111 ppm

F2 -391.24 Hz  
 PPMCM 7.37420 ppm/cm  
 HZCM 927.36371 Hz/cm

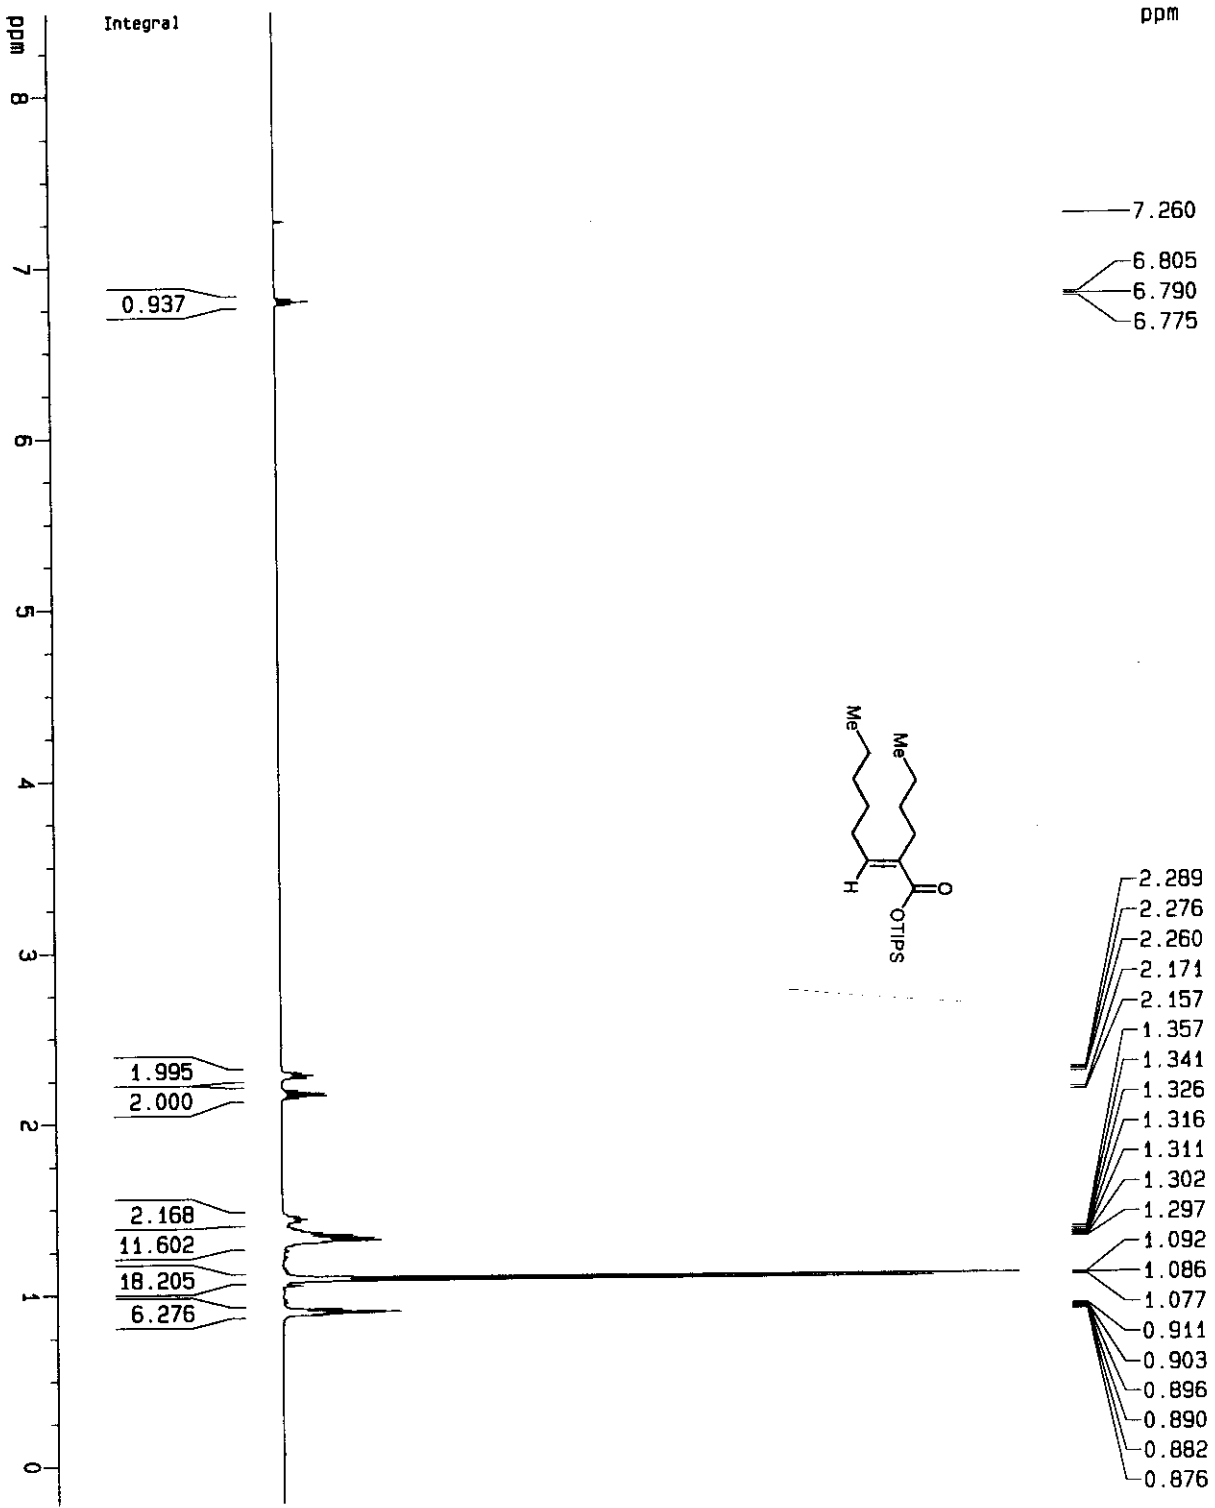

Current Data Parameters  
 NAME hexnal\_pdt  
 EXPNO 1  
 PROCNO 1

F2 - Acquisition Parameters  
 Date\_ 20051215  
 Time 12.42  
 INSTRUM spect  
 PROBHID 5 mm QNP 1H  
 PULPROG zg  
 TD 32768  
 SOLVENT CDCl3  
 NS 4  
 DS 0  
 SMH 8012.820 Hz  
 FIDRES 0.244532 Hz  
 AQ 2.0447731 sec  
 RG 16  
 DM 62.400 usec  
 DE 4.50 usec  
 TE 300.0 K  
 D1 10.00000000 sec

==== CHANNEL f1 =====  
 NUC1 1H  
 P1 10.00 usec  
 PL1 0.00 dB  
 SF01 500.1337510 MHz

F2 - Processing parameters  
 SI 16384  
 SF 500.1300129 MHz  
 WDW EM  
 SSB 0  
 LB 0.30 Hz  
 GB 0  
 PC 1.00

1D NMR plot parameters  
 CX 20.00 cm  
 F1P 8.484 ppm  
 F1 4243.21 Hz  
 F2P -0.223 ppm  
 F2 -111.58 Hz  
 PPMCM 0.43537 ppm/cm  
 HZCM 217.73967 Hz/cm

ppm

167.934

143.444

133.490

77.259

77.003

76.750

31.635

31.587

28.613

28.564

26.802

22.784

22.476

17.854

13.979

12.025

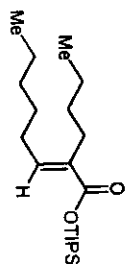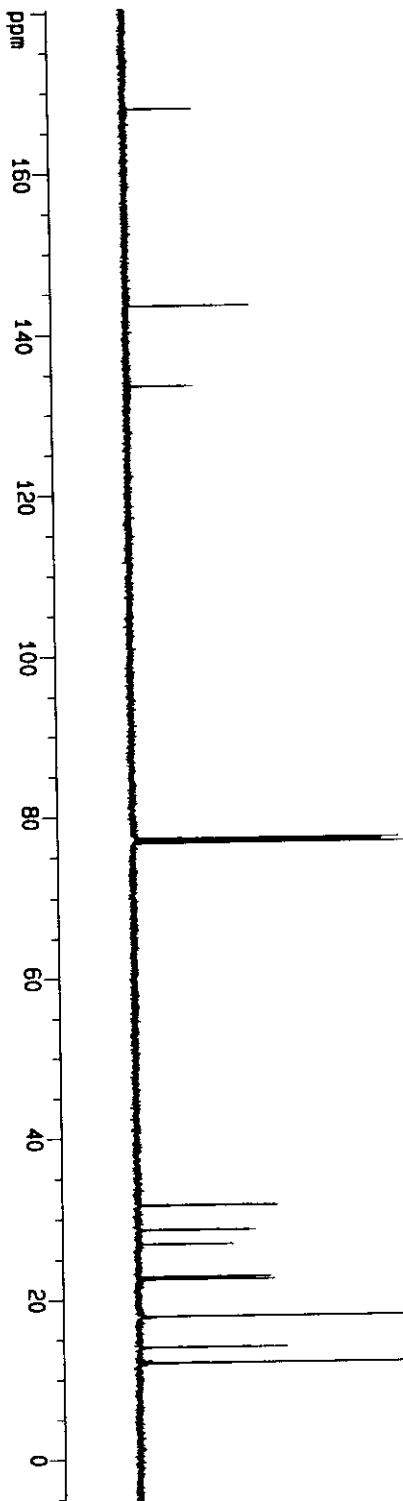

Current Data Parameters  
 NAME hexnal\_jdt  
 EXPNO 2  
 PROCNO 1

F2 - Acquisition Parameters  
 Date\_ 20051215  
 Time 12.48  
 INSTRUM spect  
 PROBDW 5 mm QNP 1H  
 PULPROG zgpg  
 TD 238090  
 SOLVENT Acetone  
 NS 40  
 DS 0  
 SMH 39682.539 HZ  
 FIDRES 0.166670 HZ  
 AQ 2.9999840 sec  
 RG 8192  
 DW 12.600 usec  
 DE 7.50 usec  
 TE 300.0 K  
 D1 4.00000000 sec  
 D11 0.03000000 sec

CHANNEL f1  
 NUC1 13C  
 P1 8.20 usec  
 PL1 0.00 dB  
 SF01 125.7736214 MHz

CHANNEL f2  
 waitz16

QPPRG2 waitz16  
 NUC2 1H  
 PCPG2 90.00 usec  
 PL2 120.00 dB  
 PL12 19.00 dB  
 SF02 500.1338000 MHz

F2 - Processing parameters  
 SI 32768  
 SF 125.7577910 MHz  
 KDM EM  
 SSB 0  
 LB 1.00 HZ  
 GB 0  
 PC 1.40

1D NMR plot parameters  
 CX 20.00 cm  
 F1P 180.435 ppm  
 F1 22686.63 Hz  
 F2P -5.140 ppm  
 F2 -646.42 Hz  
 PPMCM 9.27778 ppm/cm  
 HZCM 1165.75293 Hz/cm

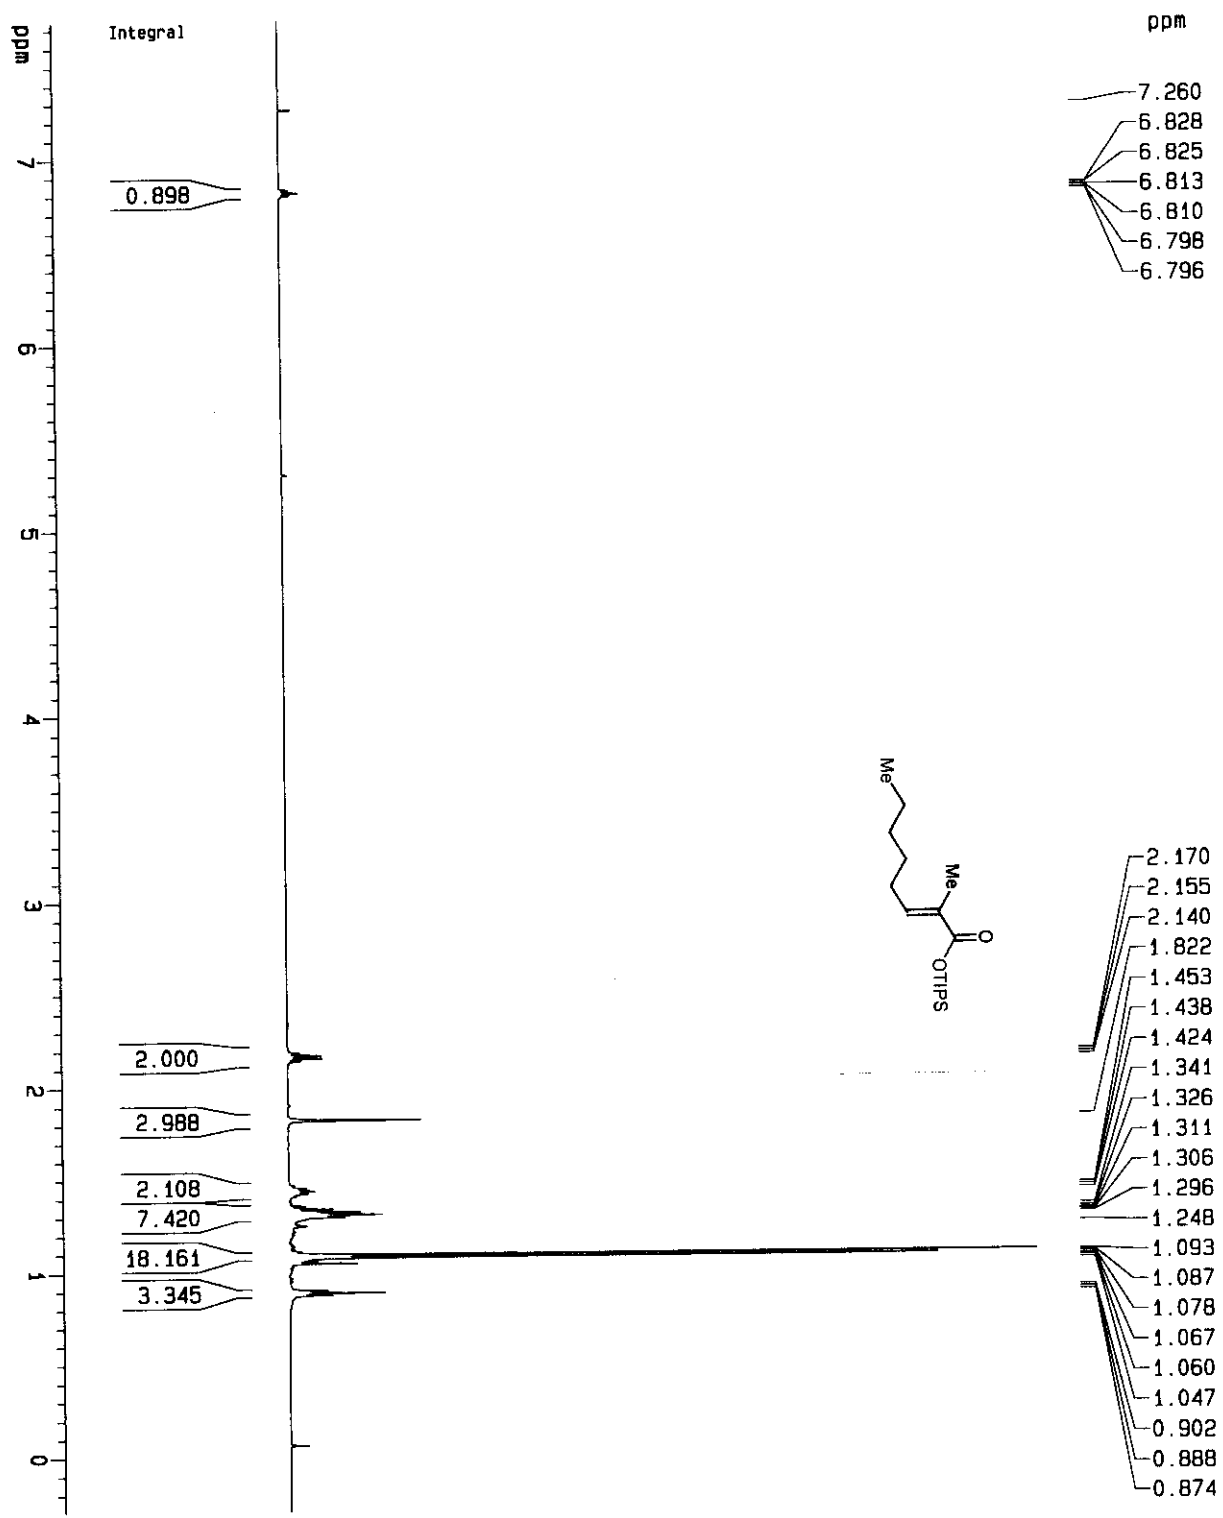

ppm  
 7.260  
 6.828  
 6.825  
 6.813  
 6.810  
 6.798  
 6.796

2.170  
 2.155  
 2.140  
 1.822  
 1.453  
 1.438  
 1.424  
 1.341  
 1.326  
 1.311  
 1.306  
 1.296  
 1.248  
 1.093  
 1.087  
 1.078  
 1.067  
 1.060  
 1.047  
 0.902  
 0.888  
 0.874

Integral  
 0.898

2.000  
 2.988  
 2.108  
 7.420  
 18.161  
 3.345

Current Data Parameters  
 NAME propylsilyl.pdt1  
 EXPNO 3  
 PROCNO 1

F2 - Acquisition Parameters  
 Date\_ 20051220  
 Time 19.28  
 INSTRUM spect  
 PROBHD 5 mm QNP 1H  
 PULPROG zg  
 TD 32768  
 SOLVENT CDCl3  
 NS 4  
 DS 0  
 SMH 5208.333 Hz  
 FIDRES 0.158946 Hz  
 AQ 3.1457779 sec  
 RG 32  
 DK 96.000 usec  
 DE 4.50 usec  
 TE 300.0 K  
 D1 10.00000000 sec

===== CHANNEL f1 =====  
 NUC1 1H  
 P1 10.00 usec  
 PL1 0.00 dB  
 SFO1 500.1320118 MHz

F2 - Processing parameters  
 SI 46384  
 SF 500.1300123 MHz  
 WDW EM  
 SSB 0  
 LB 0.30 Hz  
 GB 0  
 PC 1.00

1D NMR plot parameters  
 CX 20.00 cm  
 F1P 7.745 DDM  
 F1 3873.39 Hz  
 F2P -0.292 DDM  
 F2 -146.08 Hz  
 PPMCM 0.40184 DDM/cm  
 HZCM 200.97372 Hz/cm

ppm

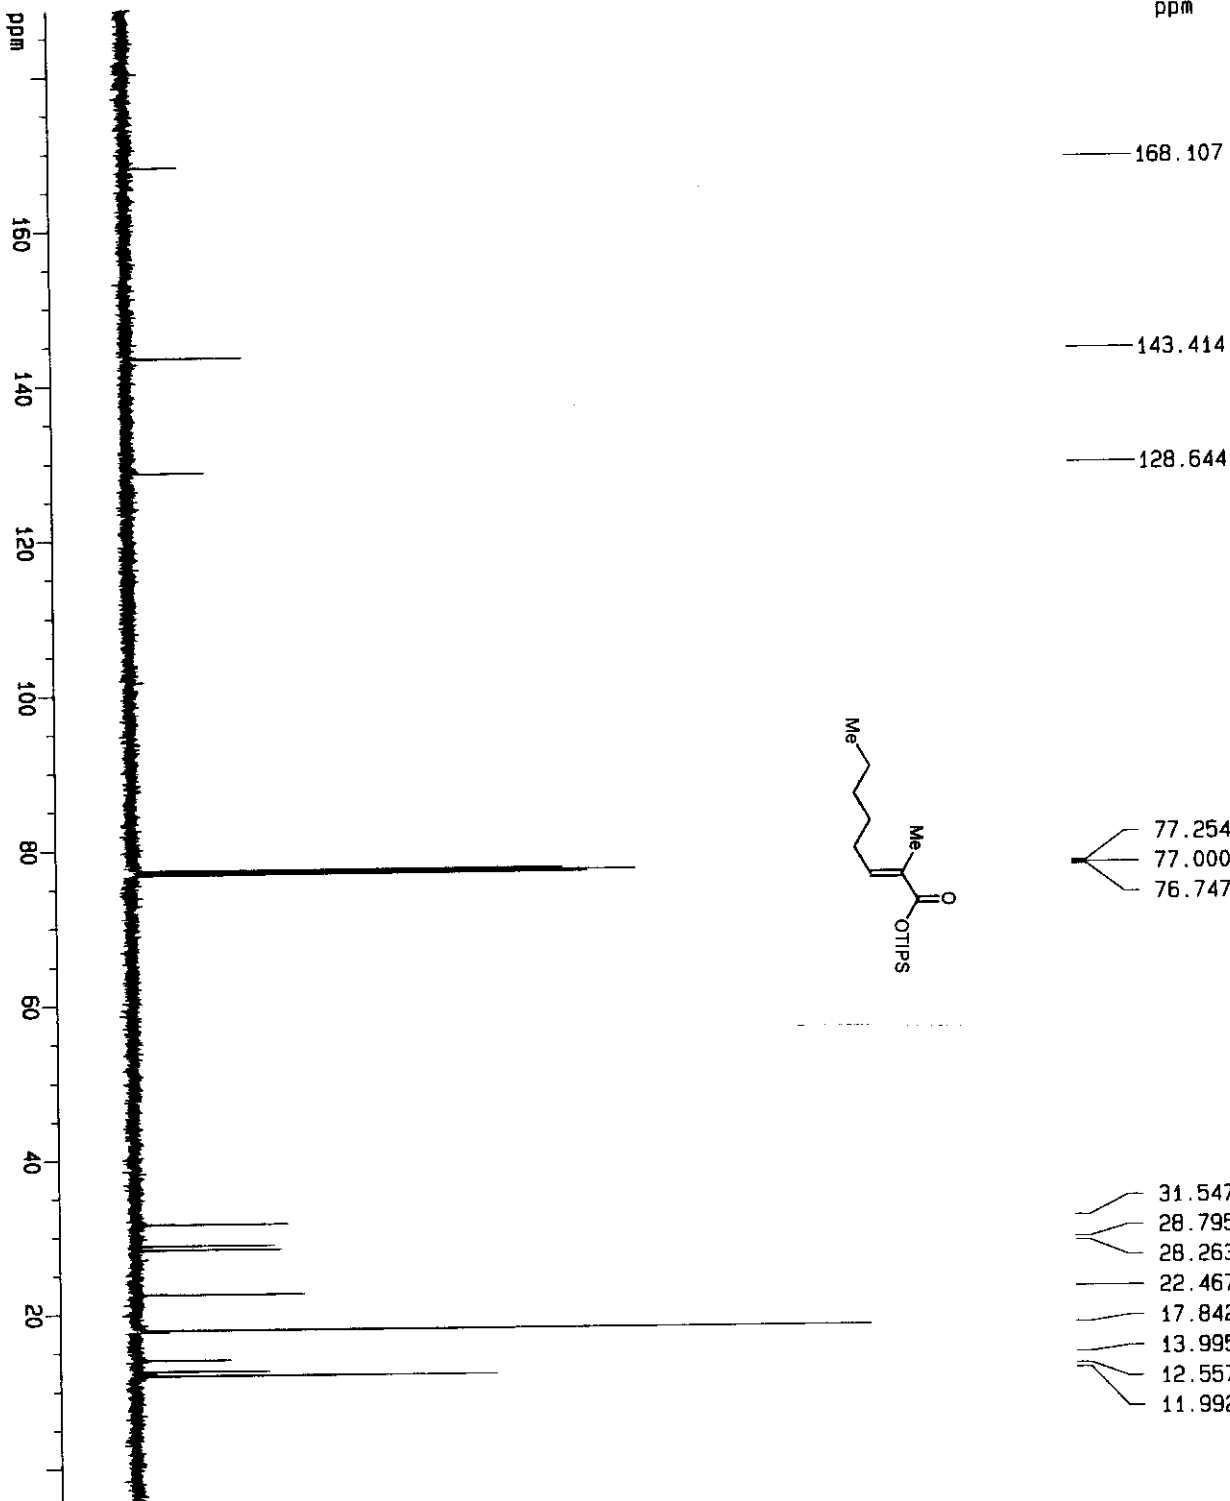

168.107  
143.414  
128.644  
77.254  
77.000  
76.747

31.547  
28.795  
28.263  
22.467  
17.842  
13.995  
12.557  
11.992

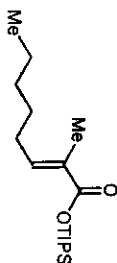

Current Data Parameters  
NAME propyns11\_pdt1  
EXPNO 4  
PROCNO 1

F2 - Acquisition Parameters  
Date\_ 20051220  
Time 19.32

INSTRUM spect  
PROBHD 5 mm QNP 1H  
PULPROG zgdc  
TD 238090

SOLVENT Aceton  
NS 28  
DS 0

SWH 39682.539 HZ  
FIDRES 0.166670 HZ  
AQ 2.9999840 sec

RG 8192  
DM 12.600 usec  
DE 7.50 usec

TE 300.0 K  
D1 4.00000000 sec  
d11 0.03000000 sec

\*\*\*\*\* CHANNEL f1 \*\*\*\*\*  
NUC1 13C  
P1 8.20 usec  
PL1 0.00 dB  
SF01 125.7736214 MHz

\*\*\*\*\* CHANNEL f2 \*\*\*\*\*  
CPOPRG2 waltz16  
NUC2 1H  
PCPD2 90.00 usec  
PL2 120.00 dB  
PL12 19.00 dB  
SF02 500.1338000 MHz

F2 - Processing parameters  
SI 32768  
SF 125.7577982 MHz  
WDW EM  
SSB 0  
LB 1.00 HZ  
GB 0  
PC 1.40

ID NMR plot parameters  
CX 20.00 cm  
F1P 188.637 ppm  
F1 23722.62 Hz  
F2P -4.121 ppm  
F2 -518.23 Hz  
PPMCH 9.63791 ppm/cm  
HZCM 1212.04285 Hz/cm

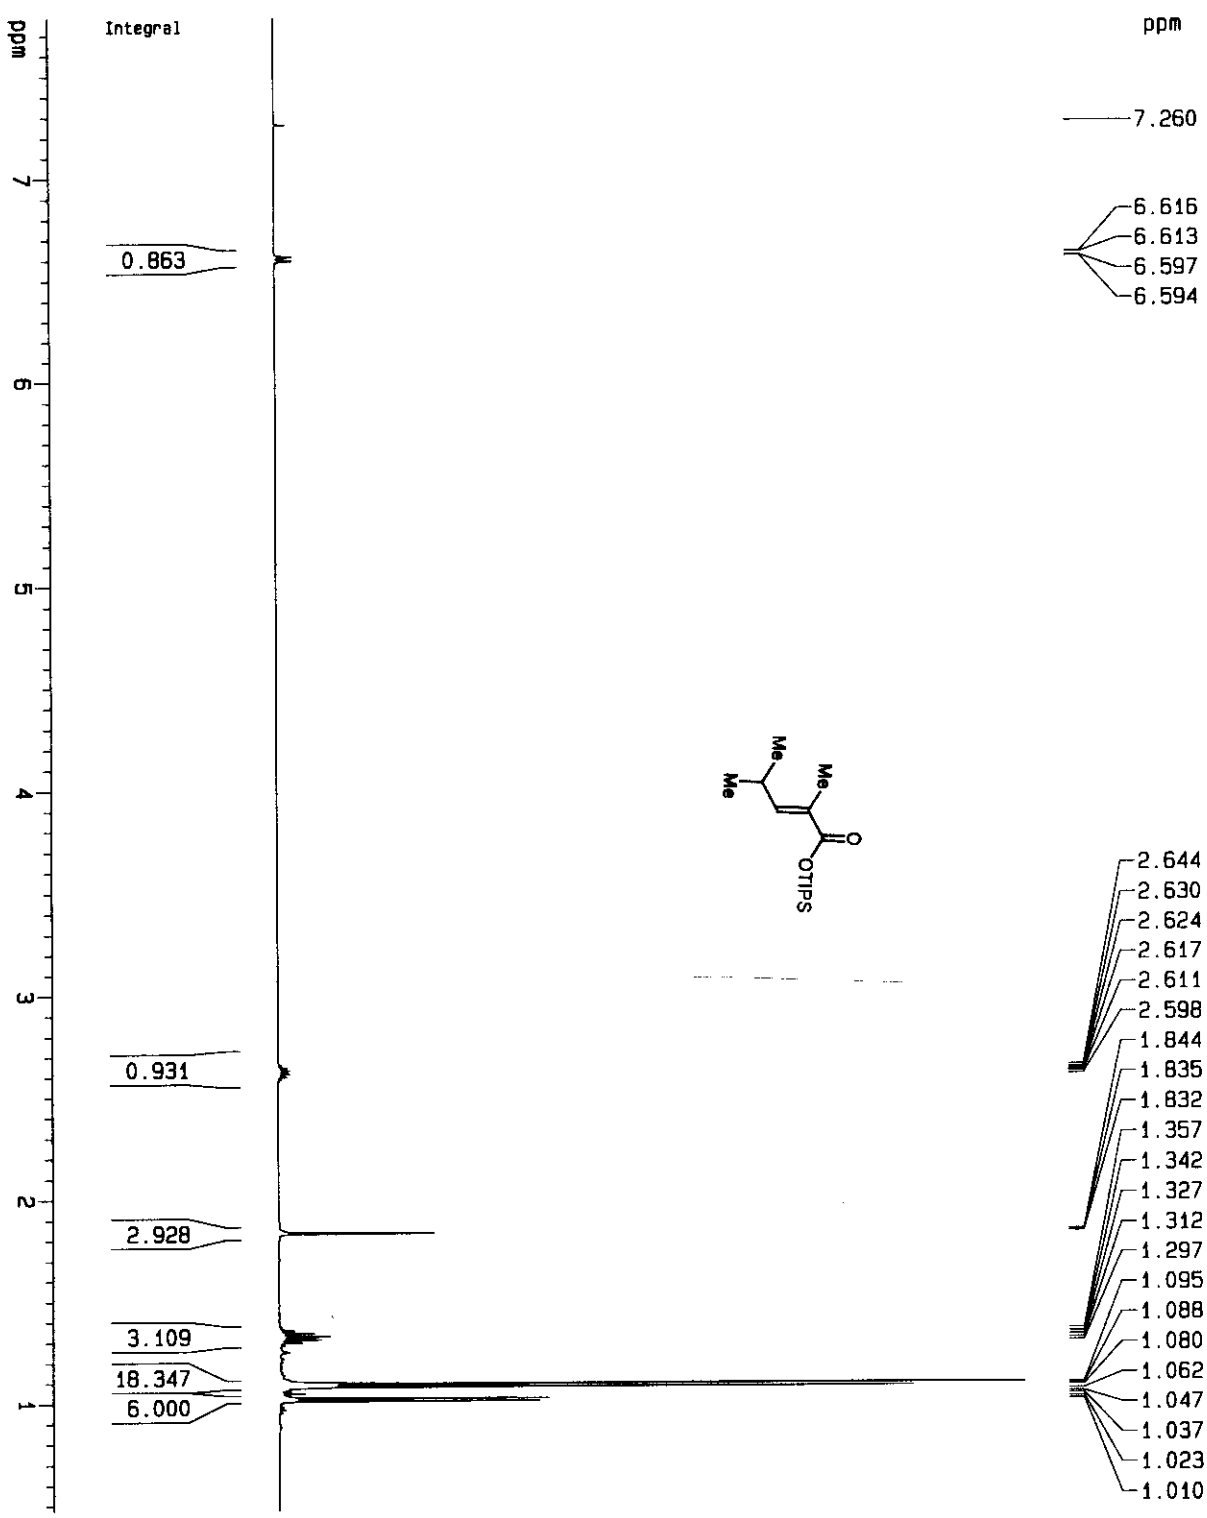

Current Data Parameters  
 NAME proyn\_1sobuly  
 EXPNO 3  
 PROCNO 1

F2 - Acquisition Parameters  
 Date\_ 20051221  
 Time 23.37  
 INSTRUM spect  
 PROBHD 5 mm QNP 1H  
 PULPROG zg  
 TD 32768  
 SOLVENT CDCl3  
 NS 4  
 DS 0  
 SMH 5208.333 Hz  
 FIDRES 0.158946 Hz  
 AQ 3.1457779 sec  
 RG 32  
 DW 96.000 usec  
 DE 4.50 usec  
 TE 300.0 K  
 D1 5.00000000 sec

===== CHANNEL f1 =====  
 NUC1 1H  
 P1 10.00 usec  
 PL1 0.00 dB  
 SF01 500.1320118 MHz

F2 - Processing parameters  
 SI 16384  
 SF 500.1300151 MHz  
 MDW EM  
 SSB 0  
 LB 0.30 HZ  
 GB 0  
 PC 1.00

1D NMR plot parameters  
 CX 20.00 cm  
 F1P 7.785 ppm  
 F1 3893.74 Hz  
 F2P 0.475 ppm  
 F2 237.56 Hz  
 PPMCH 0.36552 ppm/cm  
 HZCM 182.80905 Hz/cm

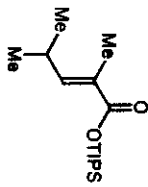

ppm

168.367

149.734

126.600

77.255

77.000

76.748

28.005

21.984

17.844

12.540

12.003

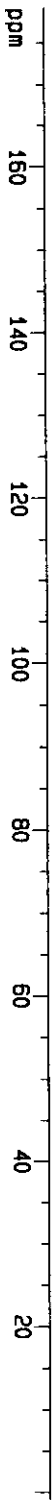

Current Data Parameters  
 NAME proyn\_1sduuty  
 EXPNO 4  
 PROCNO 1

F2 - Acquisition Parameters

Date\_ 20051221  
 Time 23.43  
 INSTRUM spect  
 PROBHD 5 mm QNP 1H  
 PULPROG zgpg  
 TD 238090  
 SOLVENT Aceton  
 NS 57  
 DS 0  
 SMH 39682.538 Hz  
 FIDRES 0.166670 Hz  
 AQ 2.9999840 sec  
 RG 6192  
 DM 12.600 usec  
 DE 7.50 usec  
 TE 300.0 K  
 D1 4.00000000 sec  
 d11 0.03000000 sec

\*\*\*\*\* CHANNEL f1 \*\*\*\*\*

NUC1 13C  
 P1 8.20 usec  
 PL1 0.00 dB  
 SF01 125.7736214 MHz

\*\*\*\*\* CHANNEL f2 \*\*\*\*\*

CPDPRG2 waltz16  
 NUC2 1H  
 PCPD2 90.00 usec  
 PL2 120.00 dB  
 PL12 19.00 dB  
 SF02 500.1338000 MHz

F2 - Processing parameters

SI 32768  
 SF 125.7577922 MHz  
 MDW EM  
 SSB 0  
 LB 1.00 Hz  
 GB 0  
 PC 1.40

1D NMR plot parameters

CX 20.00 cm  
 F1P 179.159 ppm  
 F1 22530.61 Hz  
 F2P -0.905 ppm  
 F2 -113.85 Hz  
 PPGCM 9.00320 ppm/cm  
 HZCM 1132.22266 Hz/cm



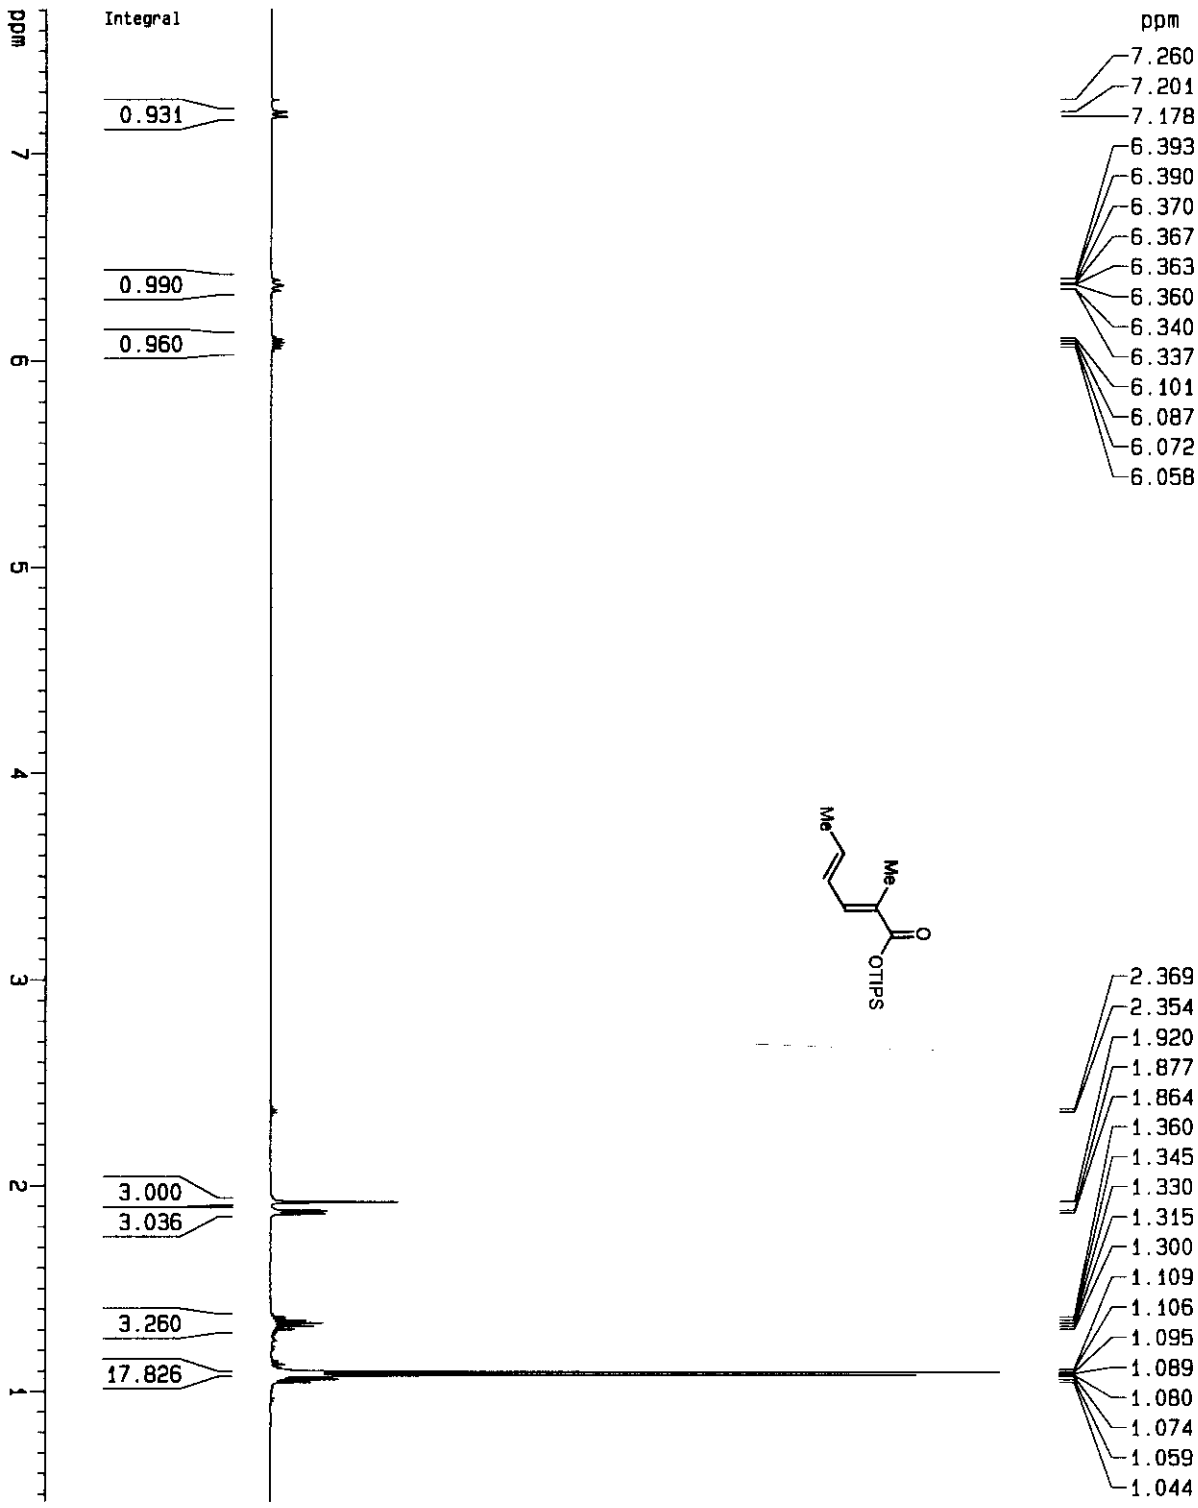

Current Data Parameters  
 NAME propylsilyl\_proto  
 EXPNO 1  
 PROCNO 1

F2 - Acquisition Parameters  
 Date\_ 20051224  
 Time 21.46  
 INSTRUM spect  
 PROBHD 5 mm QNP 1H  
 PULPROG zg  
 TD 32768  
 SOLVENT CDCl3  
 NS 4  
 DS 0  
 SMH 5208.333 Hz  
 FIDRES 0.158946 Hz  
 AQ 3.1457779 sec  
 RG 32  
 DM 96.000 usec  
 DE 4.50 usec  
 TE 300.0 K  
 D1 5.00000000 sec

\*\*\*\*\* CHANNEL f1 \*\*\*\*\*  
 NUC1 1H  
 P1 10.00 usec  
 PL1 0.00 dB  
 SF01 500.1320118 MHz

F2 - Processing parameters  
 SI 16384  
 SF 500.1300155 MHz  
 MDW EM  
 SSB 0  
 LB 0.30 Hz  
 GB 0  
 PC 1.00

1D NMR plot parameters  
 CX 20.00 cm  
 F1P 7.704 ppm  
 F1 3853.18 Hz  
 F2P 0.463 ppm  
 F2 231.49 Hz  
 PPMCM 0.36207 ppm/cm  
 HZCM 181.08444 Hz/cm

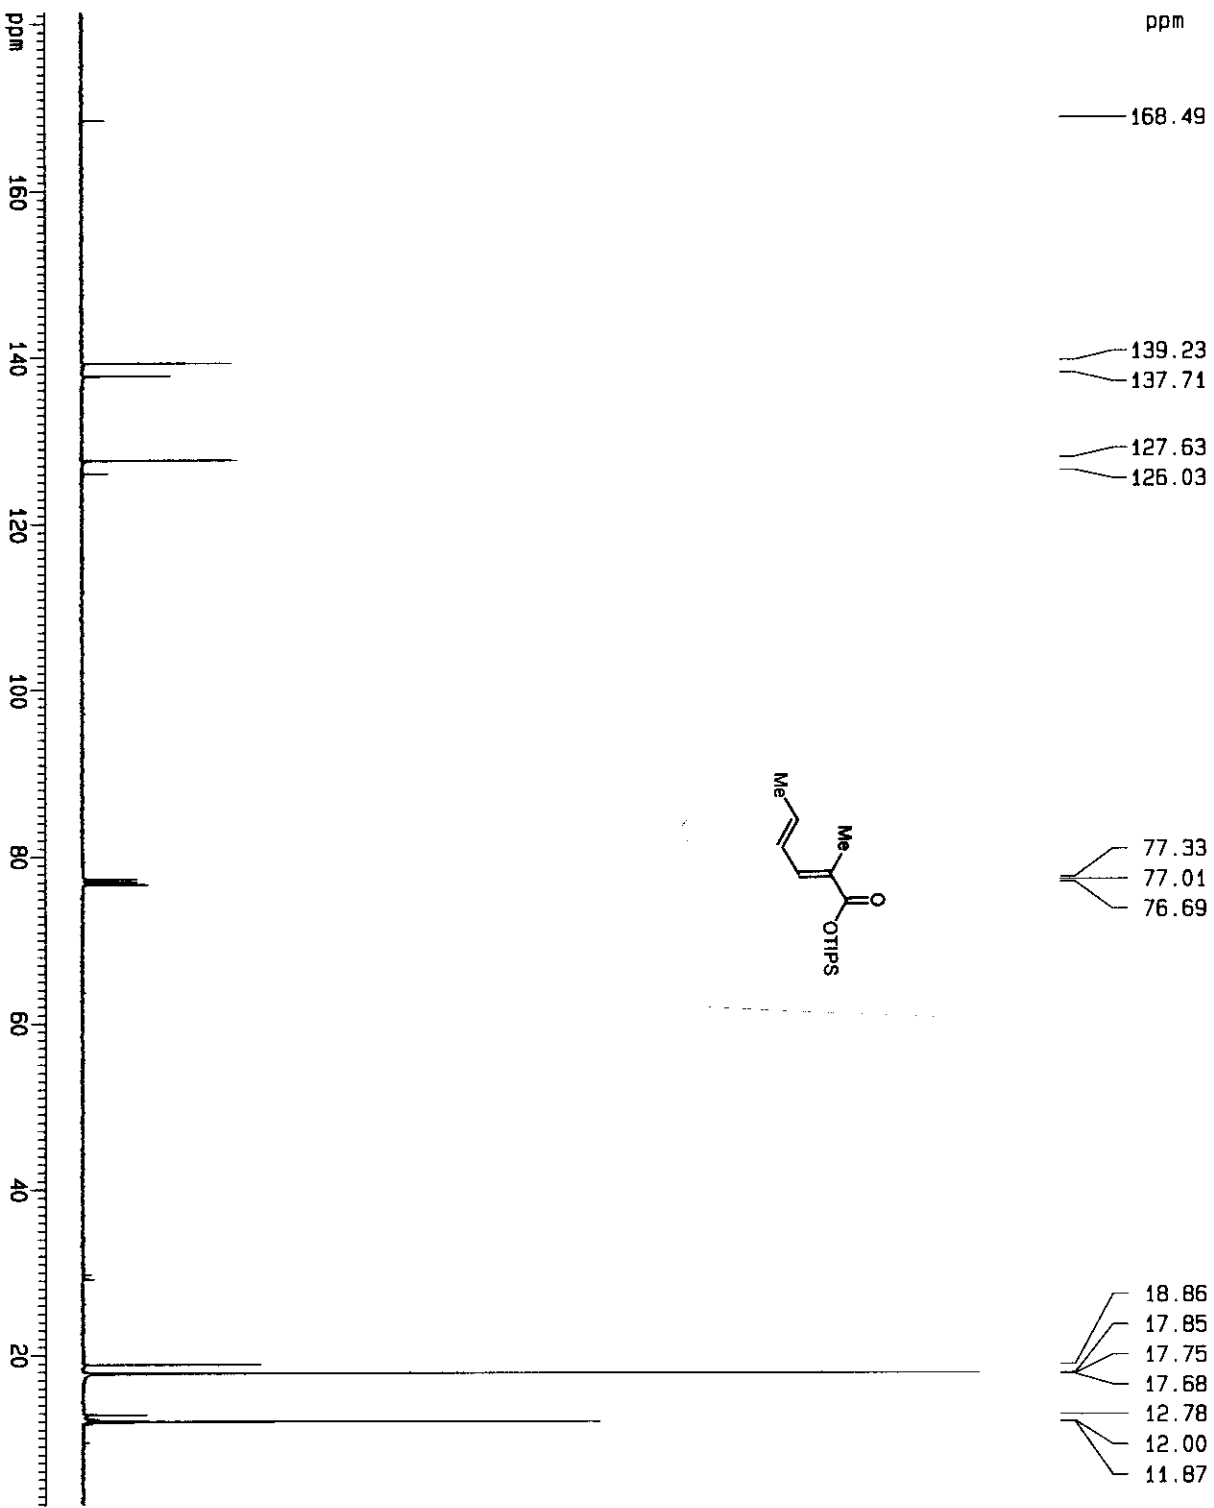

ppm

168.49

139.23

137.71

127.63

126.03

77.33

77.01

76.69

18.86

17.85

17.75

17.68

12.78

12.00

11.87

Current Data Parameters

NAME pros1\_croton.d

EXPNO 1

PROCNO 1

F2 - Acquisition Parameters

Date\_ 20051225

Time 13.56

INSTRUM spect

PROBHD 5 mm QNP 1H

PULPROG zgdc

TD 121208

SOLVENT CDCl3

NS 342

DS 0

SWH 30303.031 Hz

FIDRES 0.250008 Hz

AQ 1.9999820 sec

RG 2048

DW 16.500 usec

DE 7.50 usec

TE 300.0 K

D1 3.00000000 sec

d11 0.03000000 sec

\*\*\*\*\* CHANNEL f1 \*\*\*\*\*

NUC1 13C

P1 11.00 usec

PL1 -2.00 dB

SFO1 100.6258087 MHz

\*\*\*\*\* CHANNEL f2 \*\*\*\*\*

CPDPRG2 waltz16

NUC2 1H

PCPD2 101.00 usec

PL2 120.00 dB

PL12 19.00 dB

SFO2 400.1324710 MHz

F2 - Processing parameters

SI 46384

SF 100.6127717 MHz

WDW EM

SSB 0

LB 1.00 Hz

GB 0

PC 1.00

1D NMR plot parameters

CX 20.00 cm

F1P 181.436 ppm

F1 18254.73 Hz

F2P 1.921 ppm

F2 193.33 Hz

PRMCH 8.97570 ppm/cm

HZCH 903.07043 Hz/cm

ppm  
8  
7  
6  
5  
4  
3  
2  
1

Integral  
1.964  
0.944  
2.010  
3.000  
3.064  
17.720

ppm  
8.261  
8.258  
8.248  
8.244  
7.720  
7.547  
7.530  
7.260

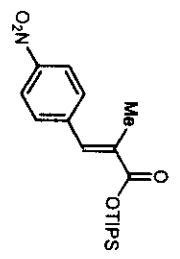

2.127  
2.124  
1.418  
1.403  
1.388  
1.372  
1.358  
1.141  
1.135  
1.129  
1.126  
1.120

Current Data Parameters  
 NAME Propynsil\_dpt2  
 EXPNO 5  
 PROCNO 1

F2 - Acquisition Parameters  
 Date\_ 20051220  
 Time 19.49  
 INSTRUM spect  
 PROBHD 5 mm QNP 1H  
 PULPROG zg  
 TD 32768  
 SOLVENT CDCl3  
 NS 4  
 DS 0  
 SMH 5208.333 Hz  
 FIDRES 0.158946 Hz  
 AQ 3.145779 sec  
 RG 32  
 DM 96.000 usec  
 DE 4.50 usec  
 TE 300.0 K  
 D1 10.00000000 sec

\*\*\*\*\* CHANNEL f1 \*\*\*\*\*  
 NUC1 1H  
 P1 10.00 usec  
 PL1 0.00 dB  
 SF01 500.1320118 MHz

F2 - Processing parameters  
 SI 16384  
 SF 500.1300123 MHz  
 MDH EM  
 SSB 0  
 LB 0.30 Hz  
 GB 0  
 PC 1.00

1D NMR plot parameters  
 CX 20.00 cm  
 F1P 8.696 ppm  
 F1 4348.94 Hz  
 F2P 0.625 ppm  
 F2 312.48 Hz  
 PPGCM 0.40354 ppm/cm  
 HZCM 201.82294 Hz/cm

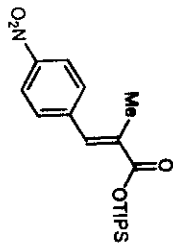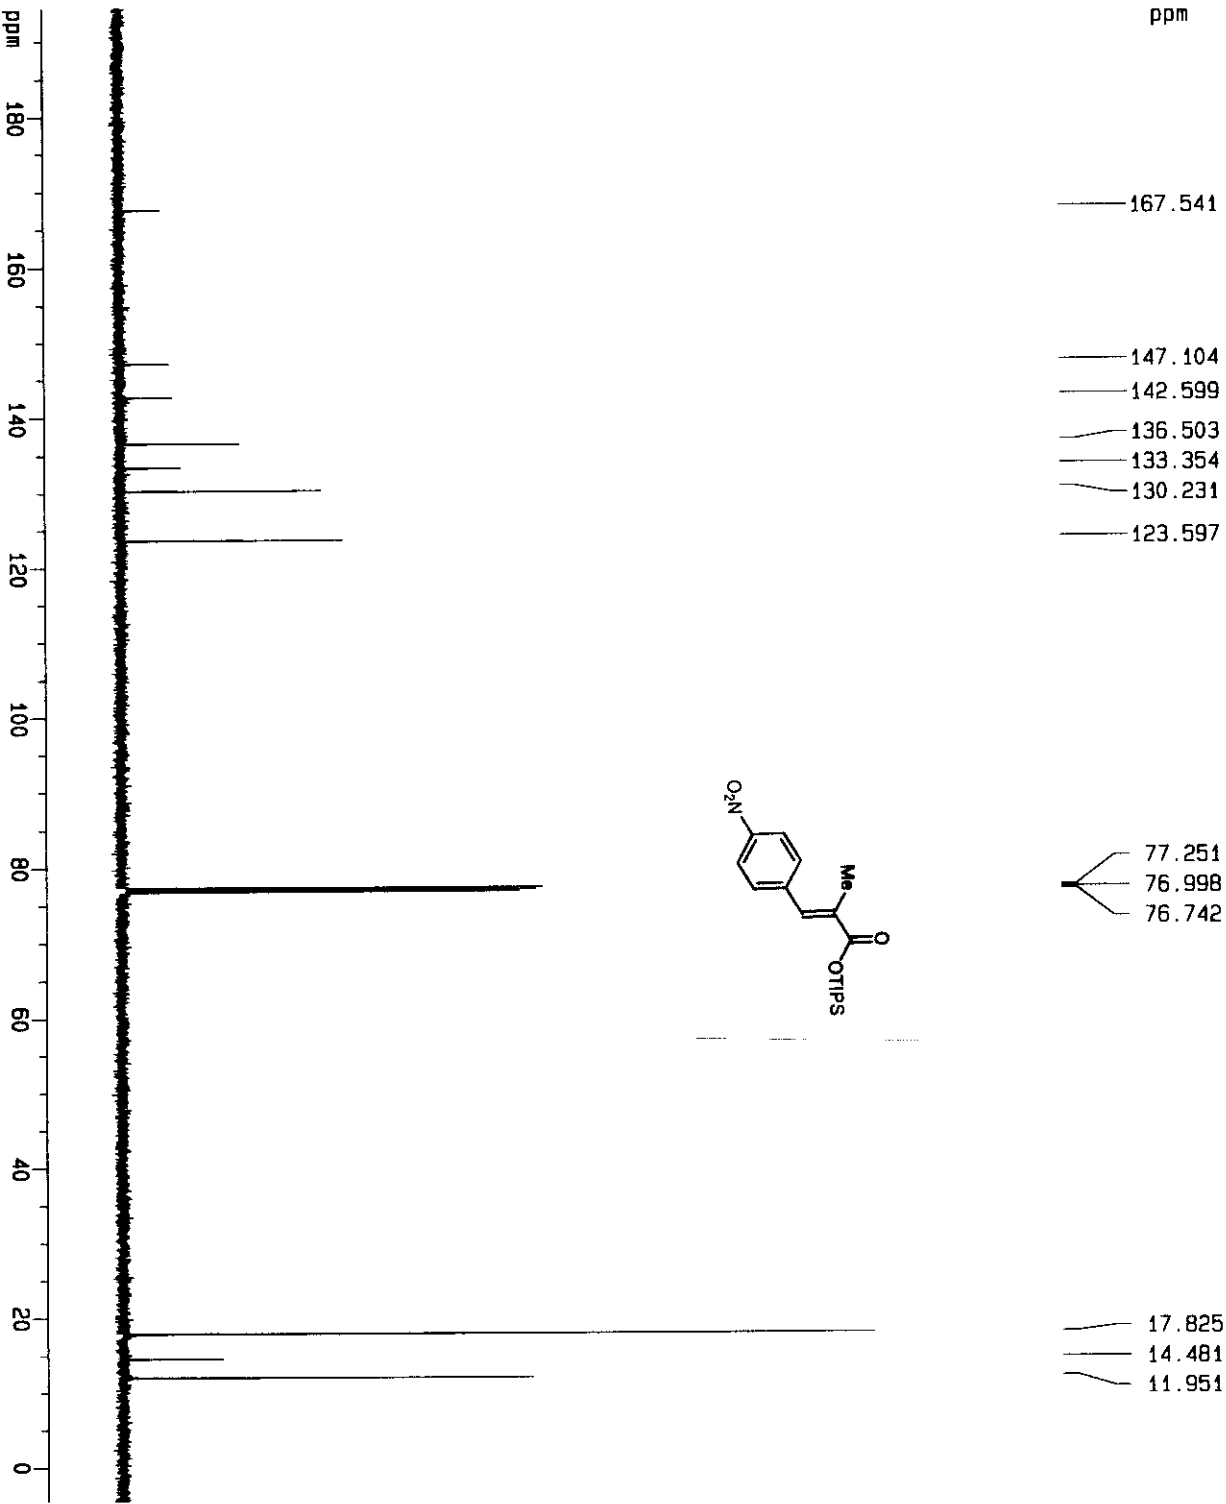

Current Data Parameters  
 NAME propylsulf1.Dtz2  
 EXPNO 6  
 PROCNO 1

F2 - Acquisition Parameters

Date\_ 20051220  
 Time 19.53  
 INSTNUM spect  
 PROBHD 5 mm QNP 1H  
 PULPROG zgpg  
 TD 288090  
 SOLVENT Aceton  
 NS 31  
 DS 0  
 SMH 39582.539 Hz  
 FIDRES 0.166670 Hz  
 AQ 2.9999840 sec  
 RG 8192  
 DW 12.600 usec  
 DE 7.50 usec  
 TE 300.0 K  
 D1 4.00000000 sec  
 d11 0.03000000 sec

\*\*\*\*\* CHANNEL f1 \*\*\*\*\*

NUC1 13C  
 P1 8.20 usec  
 PL1 0.00 dB  
 SF01 125.7736214 MHz

\*\*\*\*\* CHANNEL f2 \*\*\*\*\*

CPDPRG2 waltz16  
 NUC2 1H  
 PCPD2 90.00 usec  
 PL2 120.00 dB  
 PL12 19.00 dB  
 SF02 500.1338000 MHz

F2 - Processing parameters

SI 32768  
 SF 125.7577946 MHz  
 MDW EM  
 SSB 0  
 LB 1.00 Hz  
 GB 0  
 PC 1.40

1D NMR plot parameters

CX 20.00 cm  
 F1P 194.449 ppm  
 F1 24453.46 Hz  
 F2P -4.483 ppm  
 F2 -563.79 Hz  
 PPMQCM 9.94660 ppm/cm  
 HZCM 1250.86267 Hz/cm

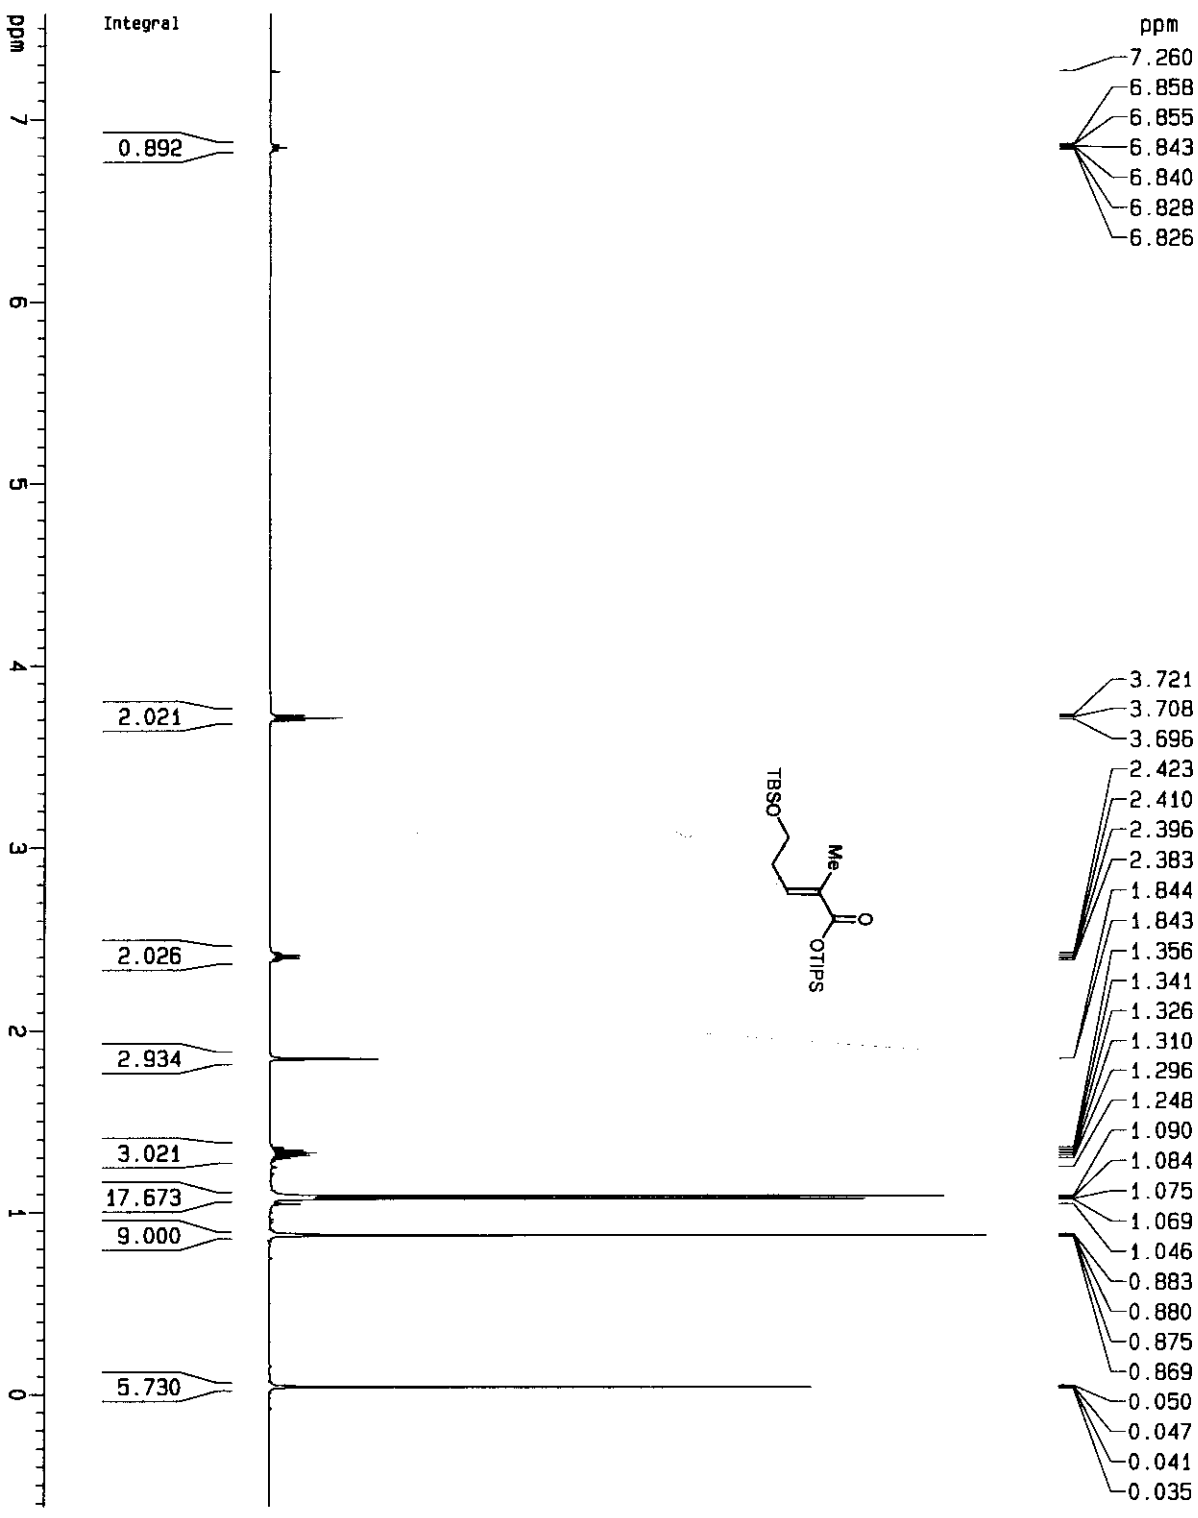

Current Data Parameters  
 NAME propyls1\_OTBS  
 EXPNO 1  
 PROCNO 1

F2 - Acquisition Parameters  
 Date\_ 20051224  
 Time 20.52

INSTRUM spect  
 PROBHD 5 mm QNP 1H  
 PULPROG zg

TD 32768  
 SOLVENT CDCl3  
 NS 4

DS 0  
 SMH 5208.333 Hz  
 FIDRES 0.158946 Hz

AQ 3.1457779 sec  
 RG 32  
 DW 96.000 usec  
 DE 4.50 usec

TE 300.0 K  
 D1 5.00000000 sec

\*\*\*\*\* CHANNEL f1 \*\*\*\*\*  
 NUC1 1H  
 P1 10.00 usec  
 PL1 0.00 dB  
 SF01 500.1320118 MHz

F2 - Processing parameters  
 SI 16384  
 SF 500.1300155 MHz  
 WDW EM  
 SSB 0

LB 0.30 Hz  
 GB 0  
 PC 1.00

1D NMR plot parameters  
 CX 20.00 cm  
 F1P 7.578 ppm  
 F1 3769.94 Hz

F2P -0.618 ppm  
 F2 -308.89 Hz  
 PPMCM 0.40978 ppm/cm  
 HZCM 204.94159 Hz/cm

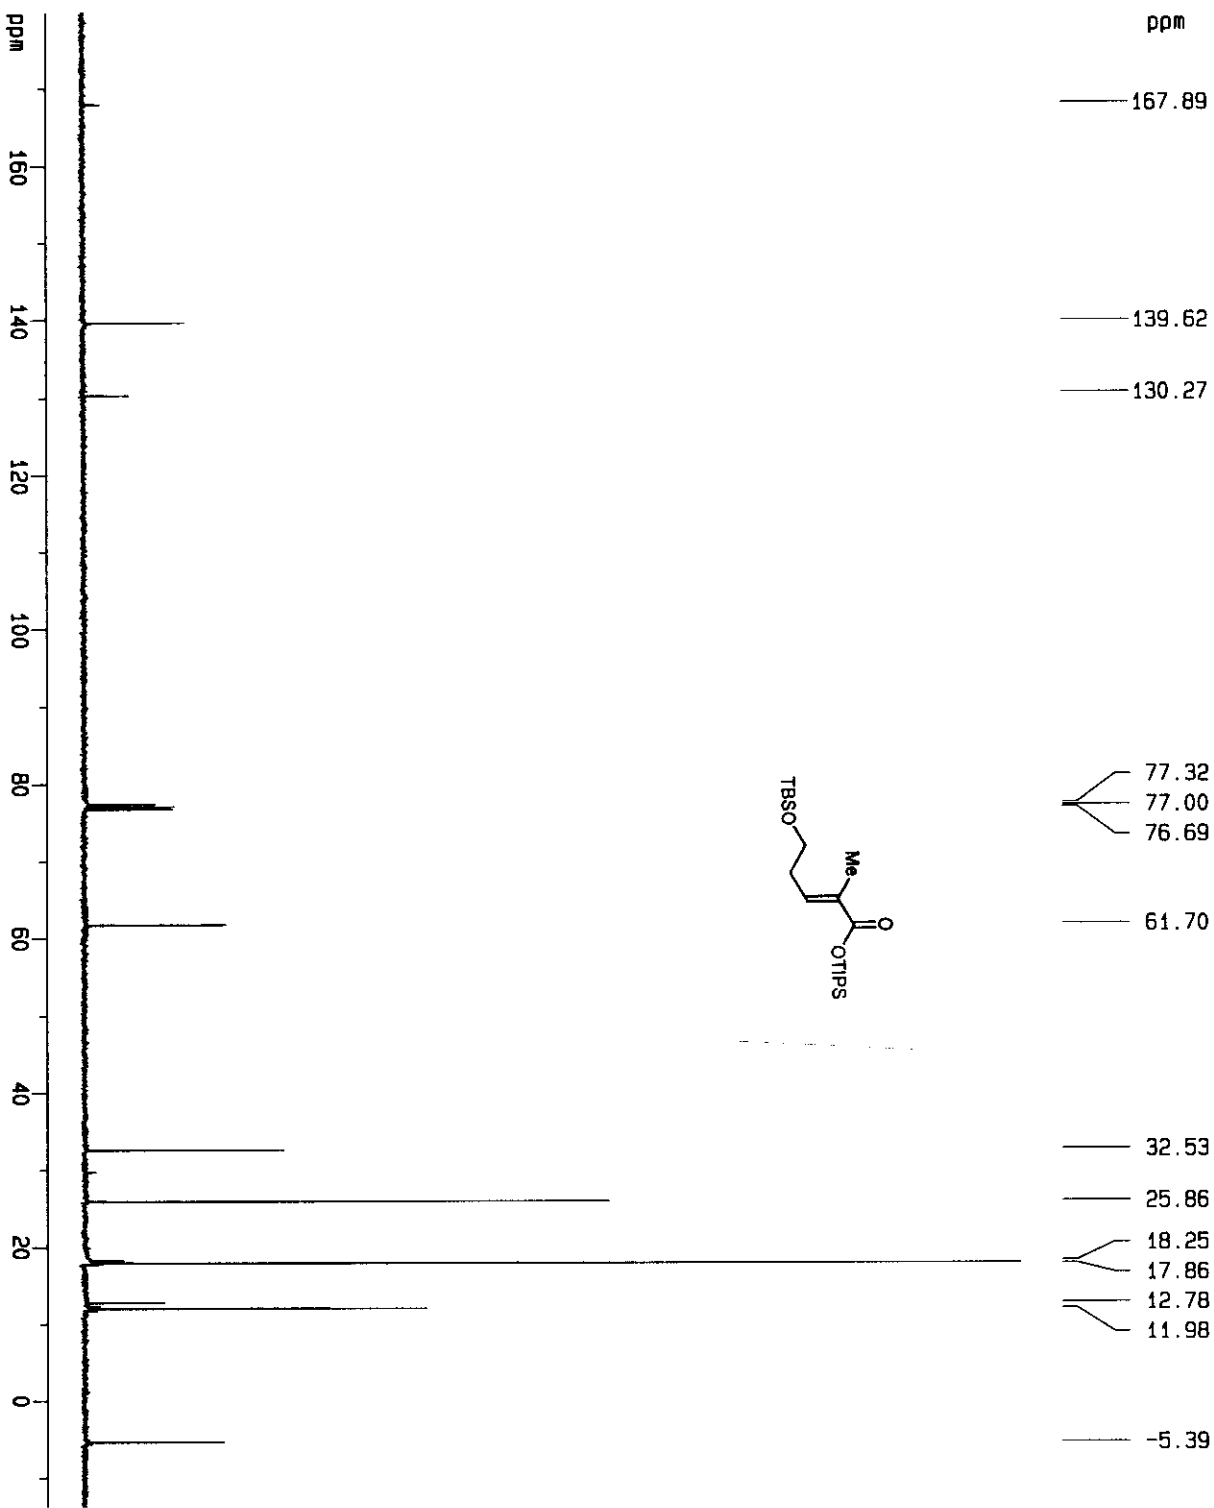

Current Data Parameters  
 NAME TBSO.gdt  
 EXPNO 1  
 PROCNO 1

F2 - Acquisition Parameters  
 Date\_ 20051224  
 Time 21.26  
 INSTNUM spect  
 PROBNM 5 mm QNP 1H  
 PULPROG zgdc  
 TD 121208  
 SOLVENT CDCl3  
 NS 235  
 DS 0  
 SMH 30303.031 Hz  
 FIDRES 0.250008 Hz  
 AQ 1.9999820 sec  
 RG 4096  
 DW 16.500 usec  
 DE 7.50 usec  
 TE 300.0 K  
 D1 3.00000000 sec  
 D11 0.03000000 sec

CHANNEL f1  
 NUC1 13C  
 P1 11.00 usec  
 PL1 -2.00 dB  
 SFO1 100.6258087 MHz

CHANNEL f2  
 CPDPRG2 waltz16  
 NUC2 1H  
 PCPD2 101.00 usec  
 PL2 120.00 dB  
 PL12 19.00 dB  
 SFO2 400.1324710 MHz

F2 - Processing parameters  
 SI 16384  
 SF 100.6127717 MHz  
 MDW EM  
 SSB 0  
 LB 1.00 Hz  
 GB 0  
 PC 1.00

10 NMR plot parameters  
 CX 20.00 cm  
 F1P 179.773 ppm  
 F1 18087.50 Hz  
 F2P -13.703 ppm  
 F2 -1378.69 Hz  
 PPMCM 9.67381 ppm/cm  
 HZCM 973.30927 Hz/cm

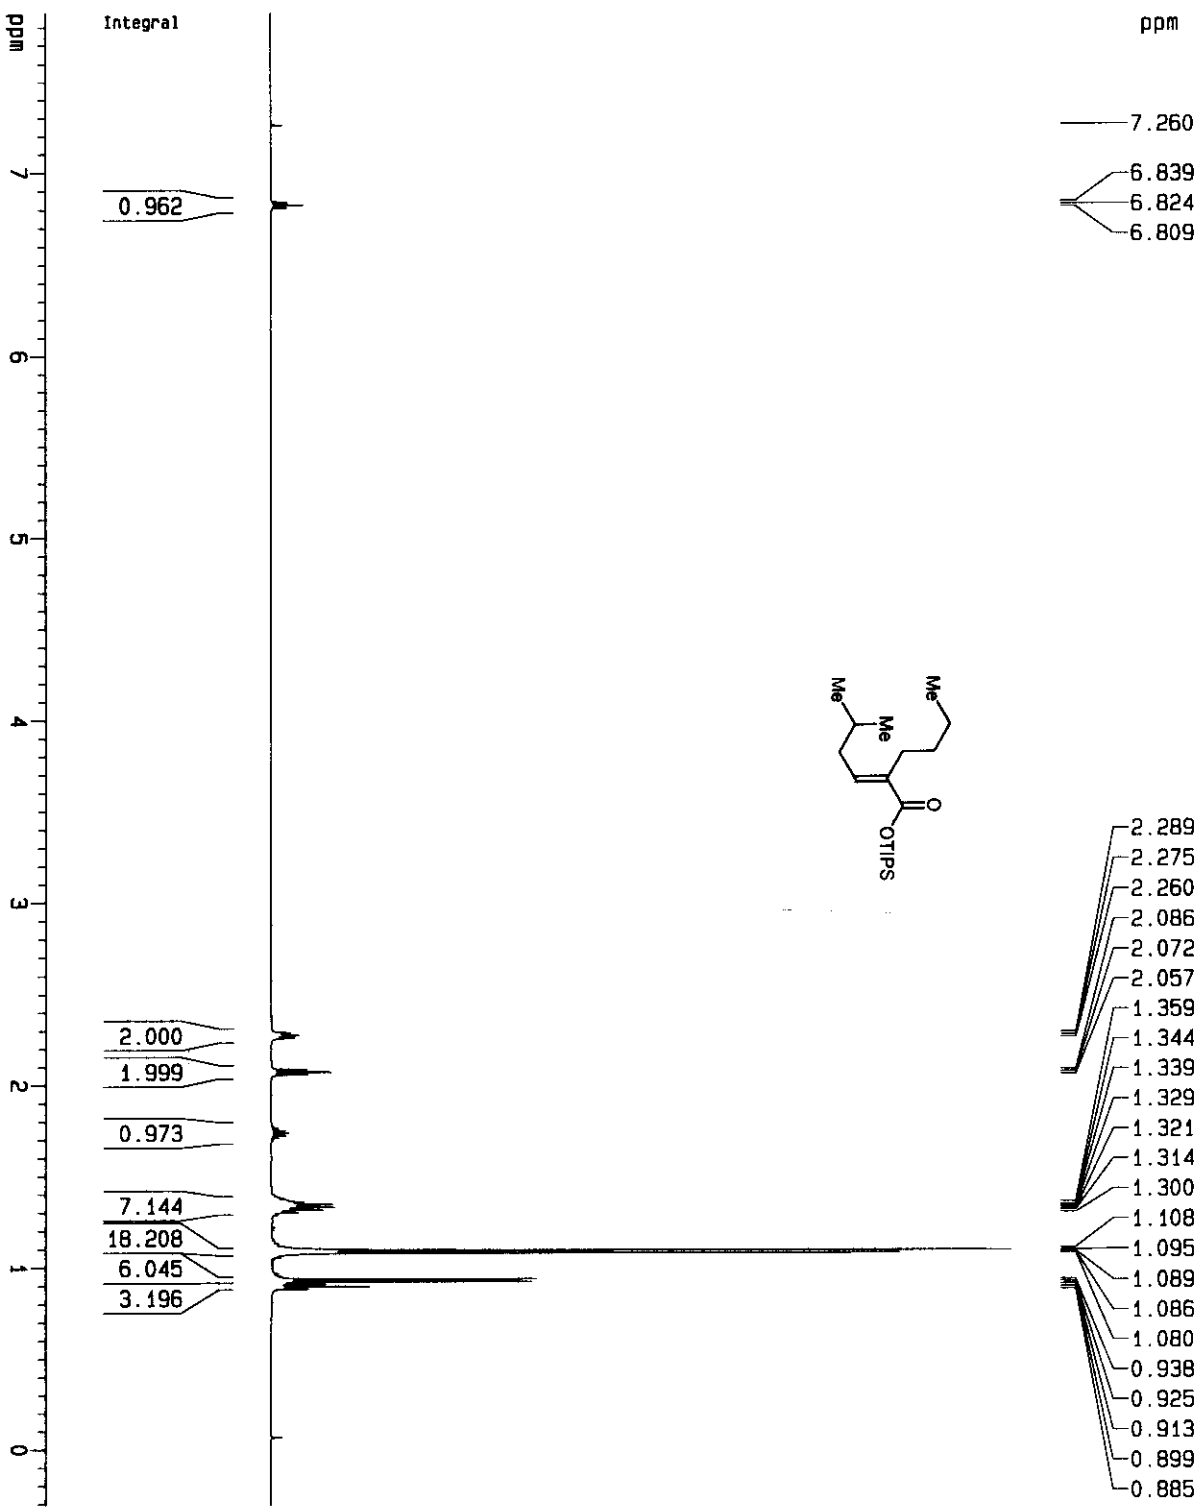

Current Data Parameters  
 NAME 1svaler\_dot  
 EXPNO 1  
 PROCNO 1

F2 - Acquisition Parameters  
 Date\_ 20051215  
 Time 20.08  
 INSTNUM spect  
 PROBHD 5 mm QNP 1H  
 PULPROG zg  
 TD 32768  
 SOLVENT CDCl3  
 NS 4  
 DS 0  
 SWH 5208.333 Hz  
 FIDRES 0.158946 Hz  
 AQ 3.1457779 sec  
 RG 32  
 DW 96.000 usec  
 DE 4.50 usec  
 TE 300.0 K  
 D1 10.00000000 sec

==== CHANNEL f1 =====  
 NUC1 1H  
 P1 10.00 usec  
 PL1 0.00 dB  
 SF01 500.1320118 MHz

F2 - Processing parameters  
 SI 16384  
 SF 500.1300129 MHz  
 MDW EM  
 SSB 0  
 LB 0.30 Hz  
 GB 0  
 PC 1.00

1D NMR plot parameters  
 CX 20.00 cm  
 F1p 7.879 ppm  
 F1 3940.69 Hz  
 F2p -0.305 ppm  
 F2 -152.38 Hz  
 PPMCM 0.40920 ppm/cm  
 HZCM 204.65353 Hz/cm

ppm

167.866

142.222

134.115

77.259  
77.004  
76.750

37.631  
31.558  
28.381  
26.850  
22.821  
22.494  
17.862  
14.002  
12.031

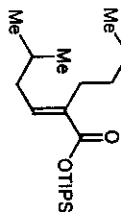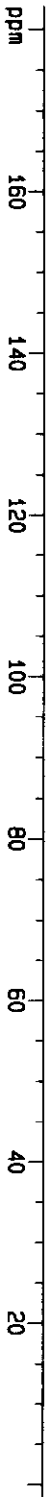

Current Data Parameters  
 NAME Isovalter\_dpt  
 EXPNO 2  
 PROCNO 1

F2 - Acquisition Parameters  
 Date\_ 20051215  
 Time 20.23

INSTRUM spect  
 PROBHD 5 mm QNP 1H  
 PULPROG zgpg  
 TD 238090  
 SOLVENT Aceton  
 NS 111  
 DS 0

SMH 39682.539 Hz  
 FIDRES 0.166670 Hz  
 AQ 2.9999840 sec

RG 8192  
 DW 12.600 usec  
 DE 7.50 usec  
 TE 300.0 K

D1 4.00000000 sec  
 d11 0.03000000 sec

\*\*\*\*\* CHANNEL f1 \*\*\*\*\*

NUC1 <sup>13</sup>C  
 P1 8.20 usec  
 PL1 0.00 dB  
 SFO1 125.7736214 MHz

\*\*\*\*\* CHANNEL f2 \*\*\*\*\*

CPDPRG2 waltz16  
 NUC2 <sup>1</sup>H  
 PCPD2 90.00 usec  
 PL2 120.00 dB  
 PL12 19.00 dB  
 SFO2 500.1338000 MHz

F2 - Processing parameters

SI 32768  
 SF 125.7577898 MHz  
 KW EM  
 SSB 0  
 LB 1.00 Hz  
 GB 0  
 PC 1.40

1D NMR plot parameters

CX 20.00 cm  
 F1P 182.826 ppm  
 F1 22991.79 Hz  
 F2P -1.701 ppm  
 F2 -213.87 Hz  
 PPMCM 9.22653 ppm/cm  
 HZCM 1160.28296 Hz/cm



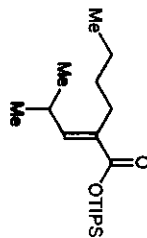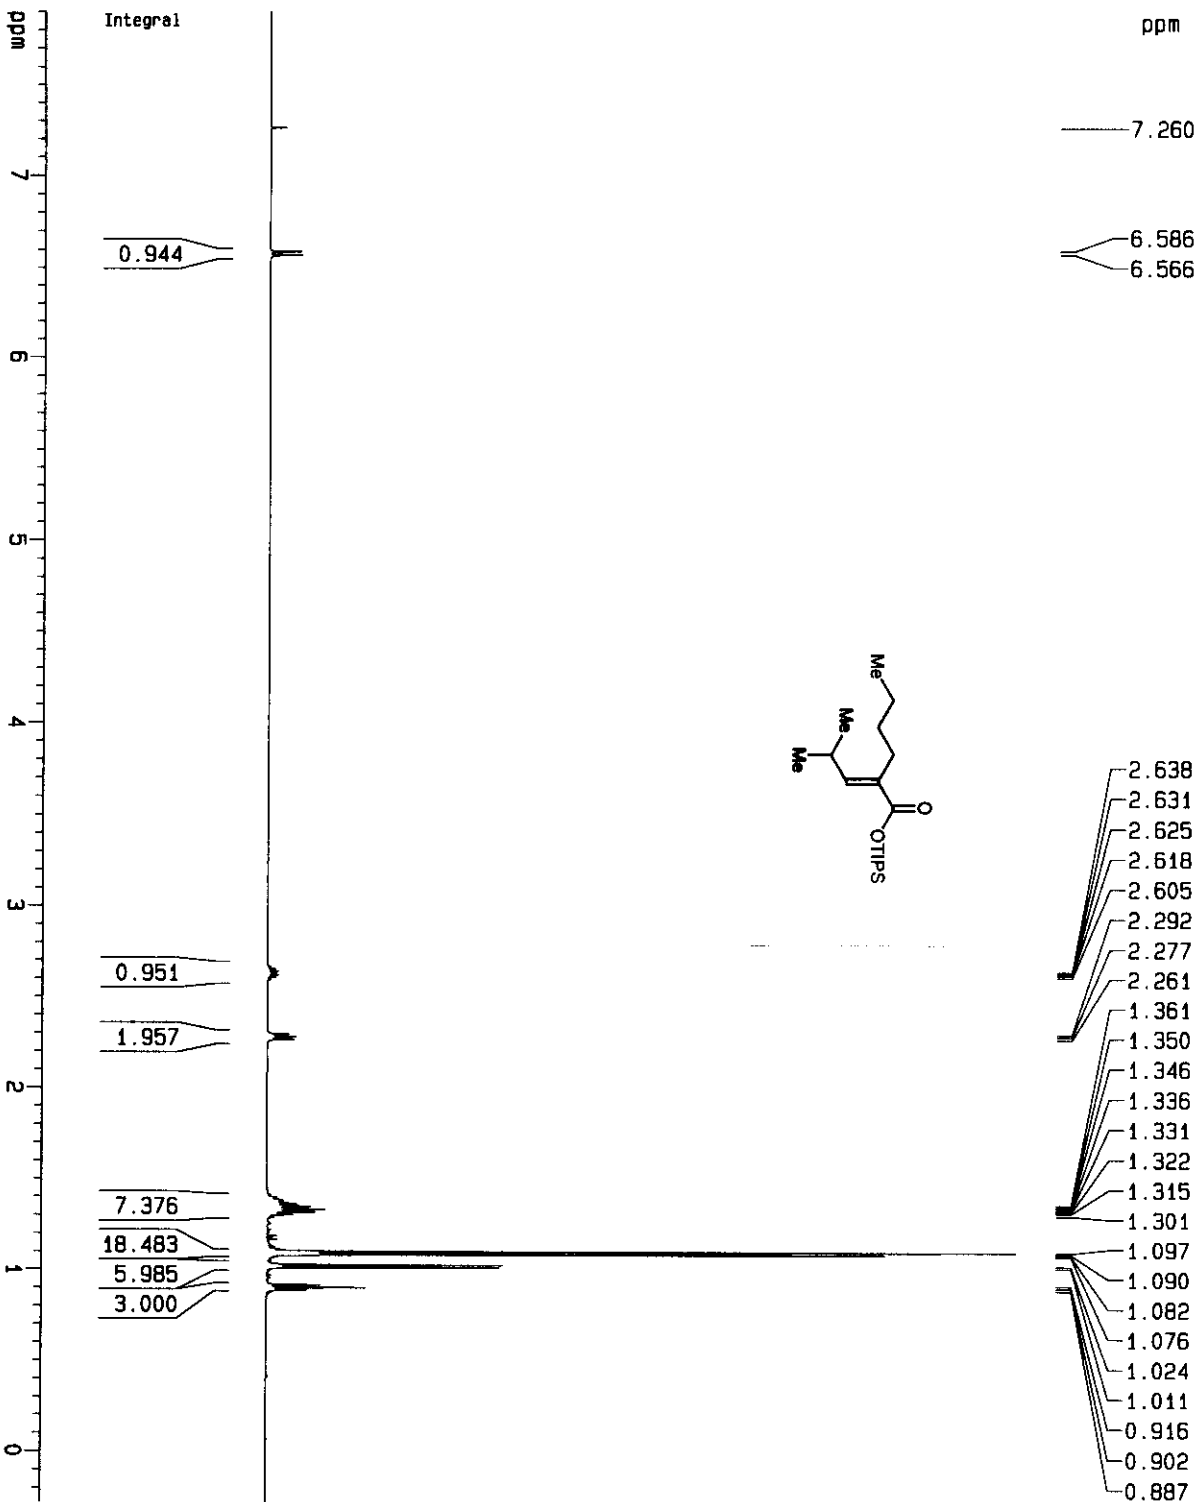

Current Data Parameters  
 NAME 1sobutyl1.pdt  
 EXPNO 1  
 PROCNO 1

F2 - Acquisition Parameters  
 Date\_ 20051215  
 Time 18.35  
 INSTRUM spect  
 PROBHD 5 mm QNP 1H  
 PULPROG zg  
 TD 32768  
 SOLVENT CDCl3  
 NS 4  
 DS 0  
 SMH 5208.333 Hz  
 FIDRES 0.158946 Hz  
 AQ 3.1457779 sec  
 RG 64  
 DW 96.000 usec  
 DE 4.50 usec  
 TE 300.0 K  
 D1 10.00000000 sec

\*\*\*\*\* CHANNEL f1 \*\*\*\*\*  
 NUC1 1H  
 P1 10.00 usec  
 PL1 0.00 dB  
 SF01 500.1320118 MHz

F2 - Processing parameters  
 SI 16384  
 SF 500.1300129 MHz  
 KW EM  
 SSB 0  
 LB 0.30 Hz  
 GB 0  
 PC 1.00

1D NMR plot parameters  
 CX 20.00 cm  
 F1P 7.902 ppm  
 F1 3952.01 Hz  
 F2P -0.282 ppm  
 F2 -141.06 Hz  
 PPMCH 0.40920 ppm/cm  
 HZCH 204.65353 Hz/cm

ppm

168.232

149.740

131.294

77.251  
76.998  
76.742

32.086  
27.908  
26.970  
22.826  
22.388  
17.861  
13.984  
12.047

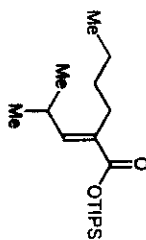

ppm  
160  
140  
120  
100  
80  
60  
40  
20  
0

Current Data Parameters  
 NAME Isobuty1\_ddt  
 EXPNO 2  
 PROCNO 1

F2 - Acquisition Parameters

Date\_ 20051215  
 Time 18.40  
 INSTRUM spect  
 PROBHD 5 mm QNP 1H  
 PULPROG zgdc  
 TD 238090  
 SOLVENT Aceton  
 NS 34  
 DS 0  
 SMH 39882.539 Hz  
 FIDRES 0.166570 Hz  
 AQ 2.9999840 sec  
 RG 8192  
 DW 12.600 usec  
 DE 7.50 usec  
 TE 300.0 K  
 D1 4.00000000 sec  
 d11 0.03000000 sec

===== CHANNEL f1 =====

NUC1 13C  
 P1 8.20 usec  
 PL1 0.00 dB  
 SFO1 125.7736214 MHz

===== CHANNEL f2 =====

CPDPRG2 waltz16  
 NUC2 1H  
 PCPD2 90.00 usec  
 PL2 120.00 dB  
 PL12 19.00 dB  
 SFO2 500.1338000 MHz

F2 - Processing parameters

SI 32768  
 SF 125.7577898 MHz  
 WDW EN  
 SSB 0  
 LB 1.00 Hz  
 GB 0  
 PC 1.40

1D NMR plot parameters

CX 20.00 cm  
 F1P 181.797 ppm  
 F1 22882.38 Hz  
 F2P -5.474 ppm  
 F2 -688.34 Hz  
 PPMCH 9.36382 ppm/cm  
 HZCM 1177.53613 Hz/cm

ppm

Integral

0.944  
4.082  
0.979

2.000

2.080  
5.136  
17.969  
3.240

ppm

7.714  
7.413  
7.401  
7.397  
7.384  
7.371  
7.340  
7.336  
7.329  
7.323  
7.316  
7.311  
7.260

2.546  
2.530  
2.513  
2.049  
1.575  
1.558  
1.550  
1.543  
1.419  
1.404  
1.389  
1.374  
1.360  
1.143  
1.128  
1.057  
1.003  
0.988  
0.937  
0.923  
0.908

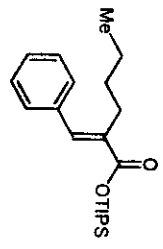

Current Data Parameters  
 NAME benzald\_pdt  
 EXPNO 3  
 PROCNO 1

F2 - Acquisition Parameters  
 Date\_ 20051214  
 Time 18.59  
 INSTRUM spect  
 PROBHD 5 mm QNP 1H  
 PULPROG zg  
 TD 32768  
 SOLVENT CDCl3  
 NS 4  
 DS 0  
 SMH 8012.820 Hz  
 FIDRES 0.244532 Hz  
 AQ 2.044731 sec  
 RG 64  
 DM 62.400 usec  
 DE 4.50 usec  
 TE 300.0 K  
 D1 10.00000000 sec

===== CHANNEL f1 =====  
 NUC1 1H  
 P1 10.00 usec  
 PL1 0.00 dB  
 SF01 500.1337510 MHz

F2 - Processing parameters  
 SI 16384  
 SF 500.1300129 MHz  
 MDW EM  
 SSB 0  
 LB 0.30 Hz  
 GB 0  
 PC 1.00

1D NMR plot parameters  
 CX 20.00 cm  
 F1P 8.972 ppm  
 F1 4487.07 Hz  
 F2P -0.293 ppm  
 F2 -146.43 Hz  
 PPMCM 0.46323 ppm/cm  
 HZCM 231.67503 Hz/cm

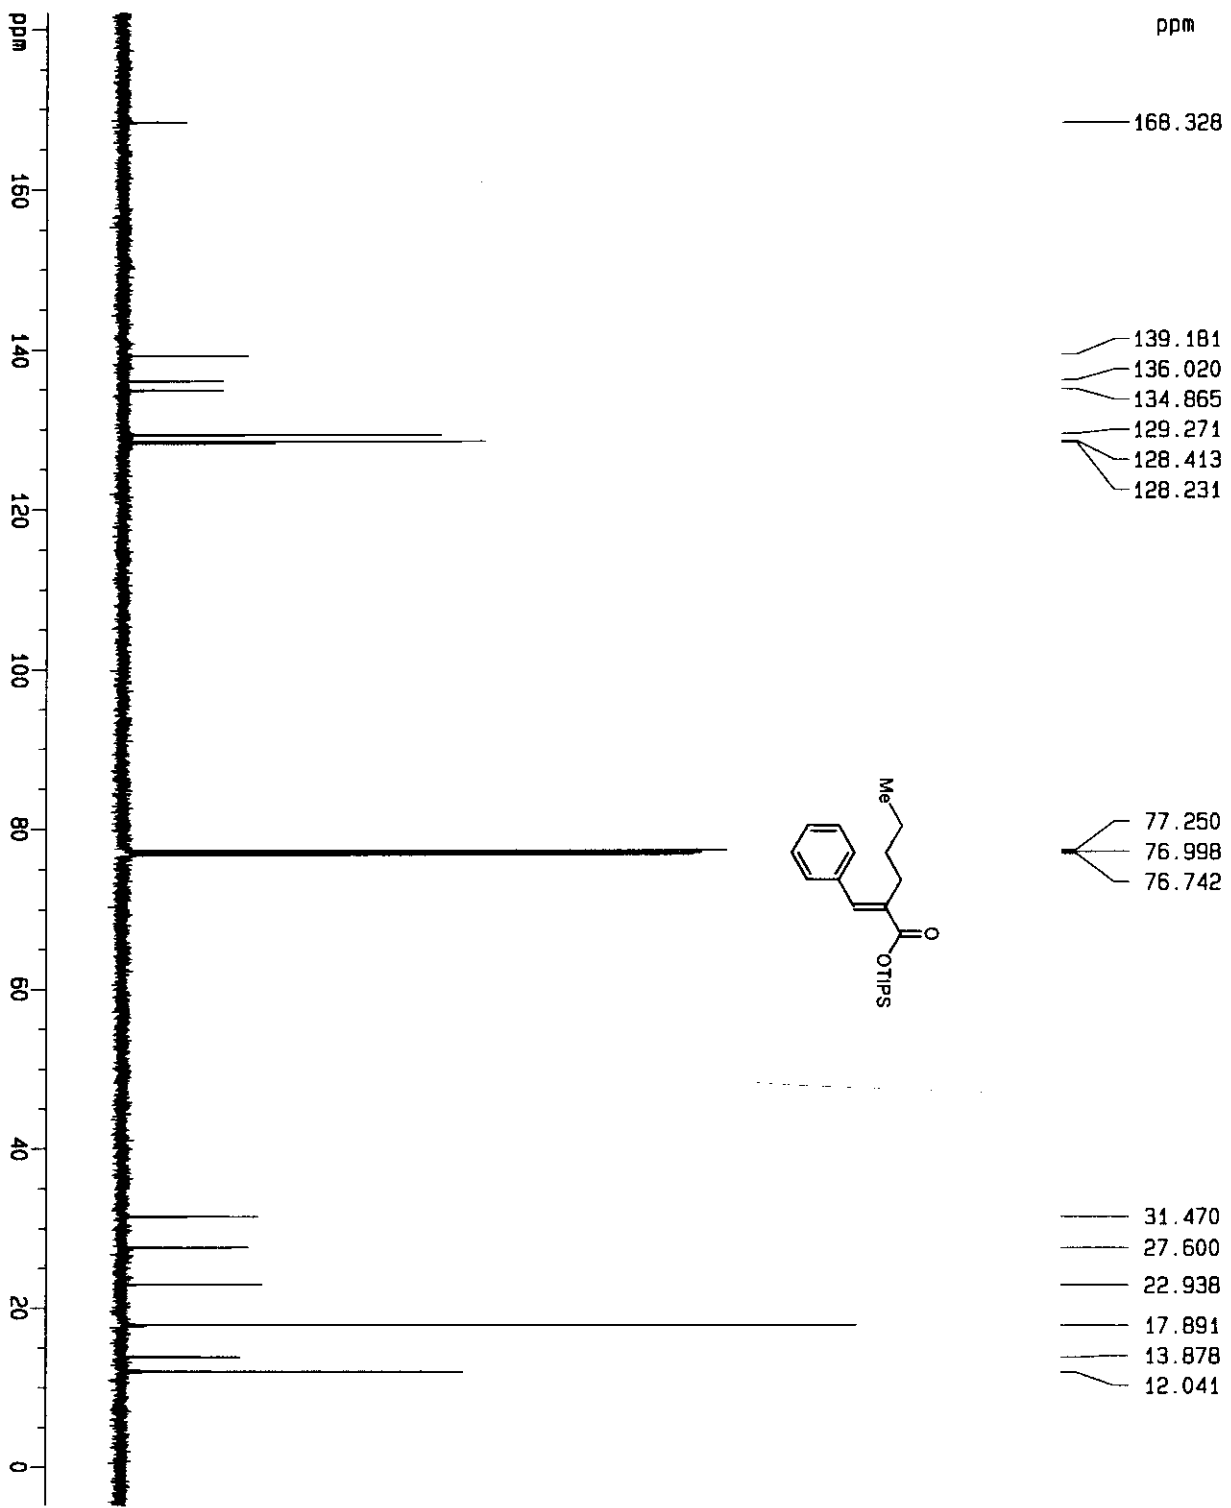

- 168.328
- 139.181
- 136.020
- 134.865
- 129.271
- 128.413
- 128.231
- 77.250
- 76.998
- 76.742
- 31.470
- 27.600
- 22.938
- 17.891
- 13.878
- 12.041

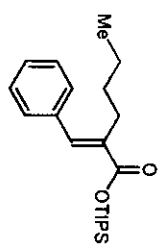

Current Data Parameters  
 NAME benzal\_dct  
 EXPNO 4  
 PROCNO 1

F2 - Acquisition Parameters  
 Date\_ 20051214  
 Time 19.04  
 INSTRUM spect  
 PROBHD 5 mm QNP 1H  
 PULPROG zgdc  
 TD 238090  
 SOLVENT Aceton  
 NS 48  
 DS 0  
 SMH 39682.539 Hz  
 FIDRES 0.166670 Hz  
 AQ 2.9999840 sec  
 RG 8192  
 DM 12.600 usec  
 DE 7.50 usec  
 TE 300.0 K  
 D1 4.00000000 sec  
 d11 0.03000000 sec

CHANNEL f1  
 NUC1 13C  
 P1 8.20 usec  
 PL1 0.00 dB  
 SFO1 125.7736214 MHz

CHANNEL f2  
 CPDPRG2 waltz16  
 NUC2 1H  
 PCPD2 90.00 usec  
 PL2 120.00 dB  
 PL12 19.00 dB  
 SFO2 500.1388000 MHz

F2 - Processing parameters  
 SI 32768  
 SF 125.7577934 MHz  
 WDM EM  
 SSB 0  
 LB 1.00 Hz  
 GB 0  
 PC 1.40

1D NMR plot parameters  
 CX 20.00 cm  
 F1P 182.111 ppm  
 F1 22501.88 Hz  
 F2P -4.816 ppm  
 F2 -605.71 Hz  
 PPMCM 9.34638 ppm/cm  
 HZCM 1175.37964 Hz/cm

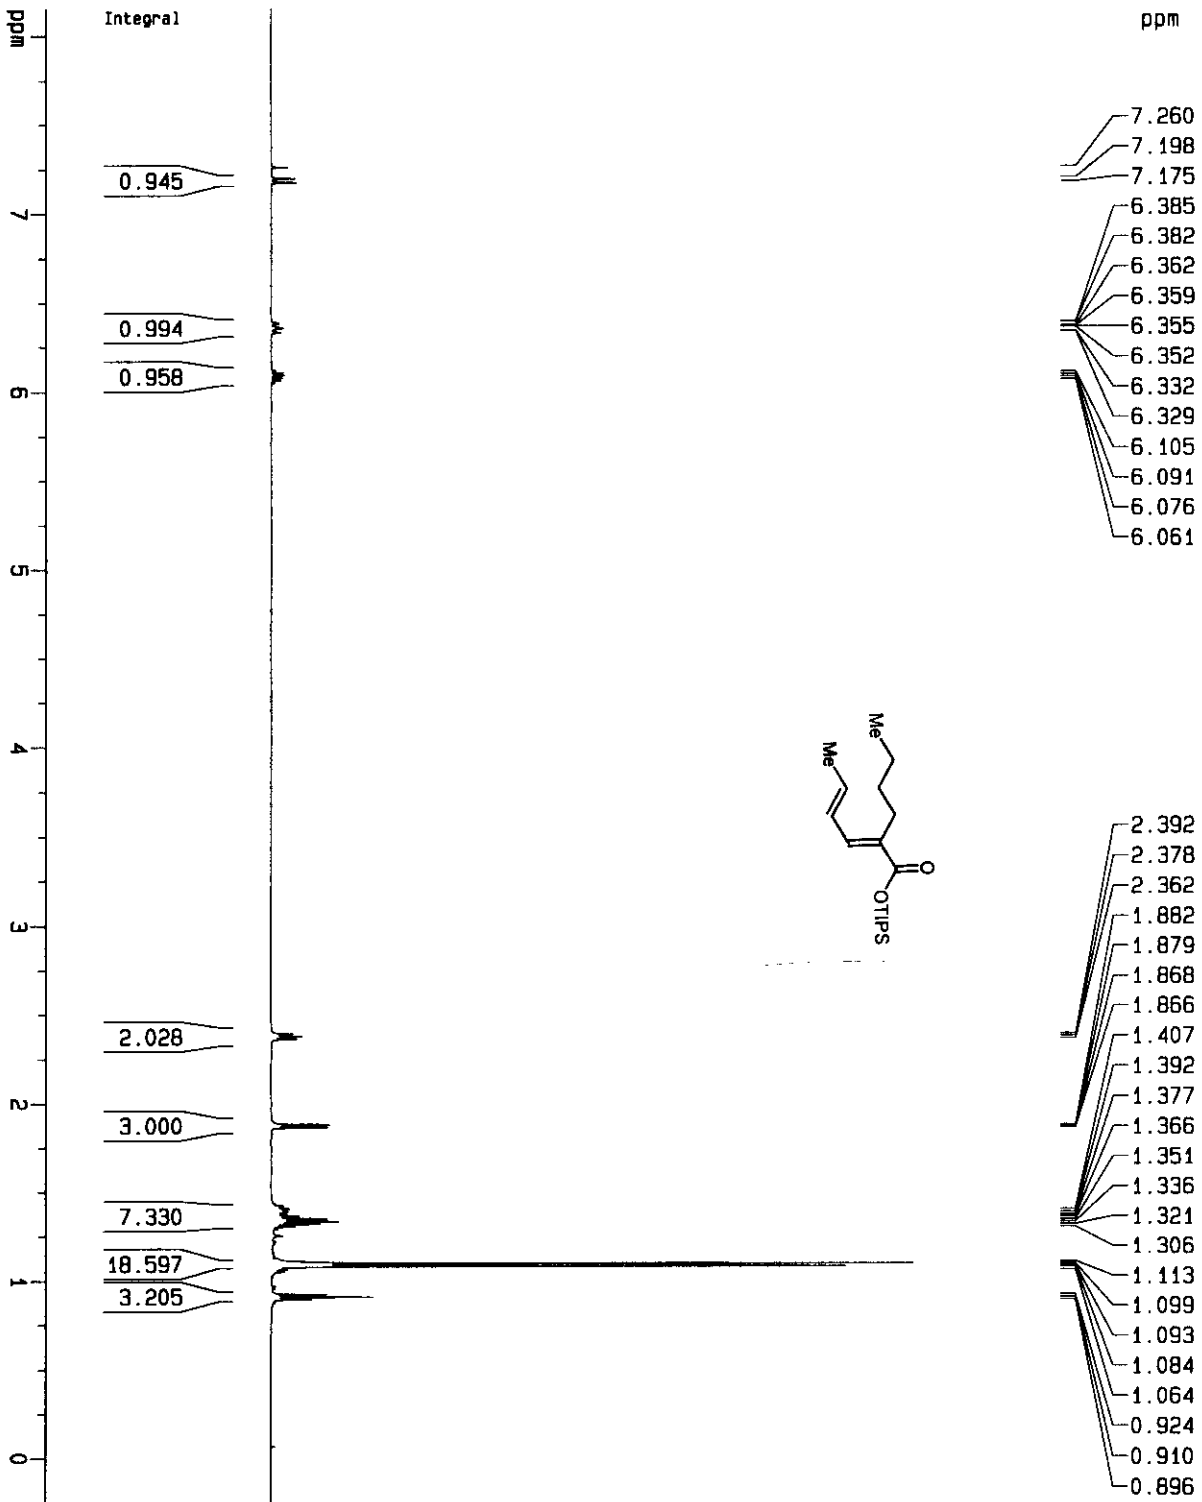

Current Data Parameters  
 NAME crotonal\_d14.pdt  
 EXPNO 1  
 PROCNO 1

F2 - Acquisition Parameters  
 Date\_ 20051214  
 Time 22.32  
 INSTRUM spect  
 PROBH0 5 mm GNP 1H  
 PULPROG zg  
 TD 32768  
 SOLVENT CDCl3  
 NS 4  
 DS 0

SWH 8012.820 Hz  
 FIDRES 0.244532 Hz  
 AQ 2.0447731 sec  
 RG 64  
 DW 62.400 usec  
 DE 4.50 usec  
 TE 300.0 K  
 D1 10.00000000 sec

===== CHANNEL f1 =====  
 NUC1 1H  
 P1 10.00 usec  
 PL1 0.00 dB  
 SF01 500.1337510 MHz

F2 - Processing parameters  
 SI 16384  
 SF 500.1300129 MHz  
 WDM EM  
 SSB 0  
 LB 0.30 Hz  
 GB 0  
 PC 1.00

1D NMR plot parameters  
 CX 20.00 cm  
 F1P 8.153 ppm  
 F1 4077.73 Hz  
 F2P -0.241 ppm  
 F2 -120.29 Hz  
 PPMCM 0.41969 ppm/cm  
 HZCM 209.90106 Hz/cm

ppm

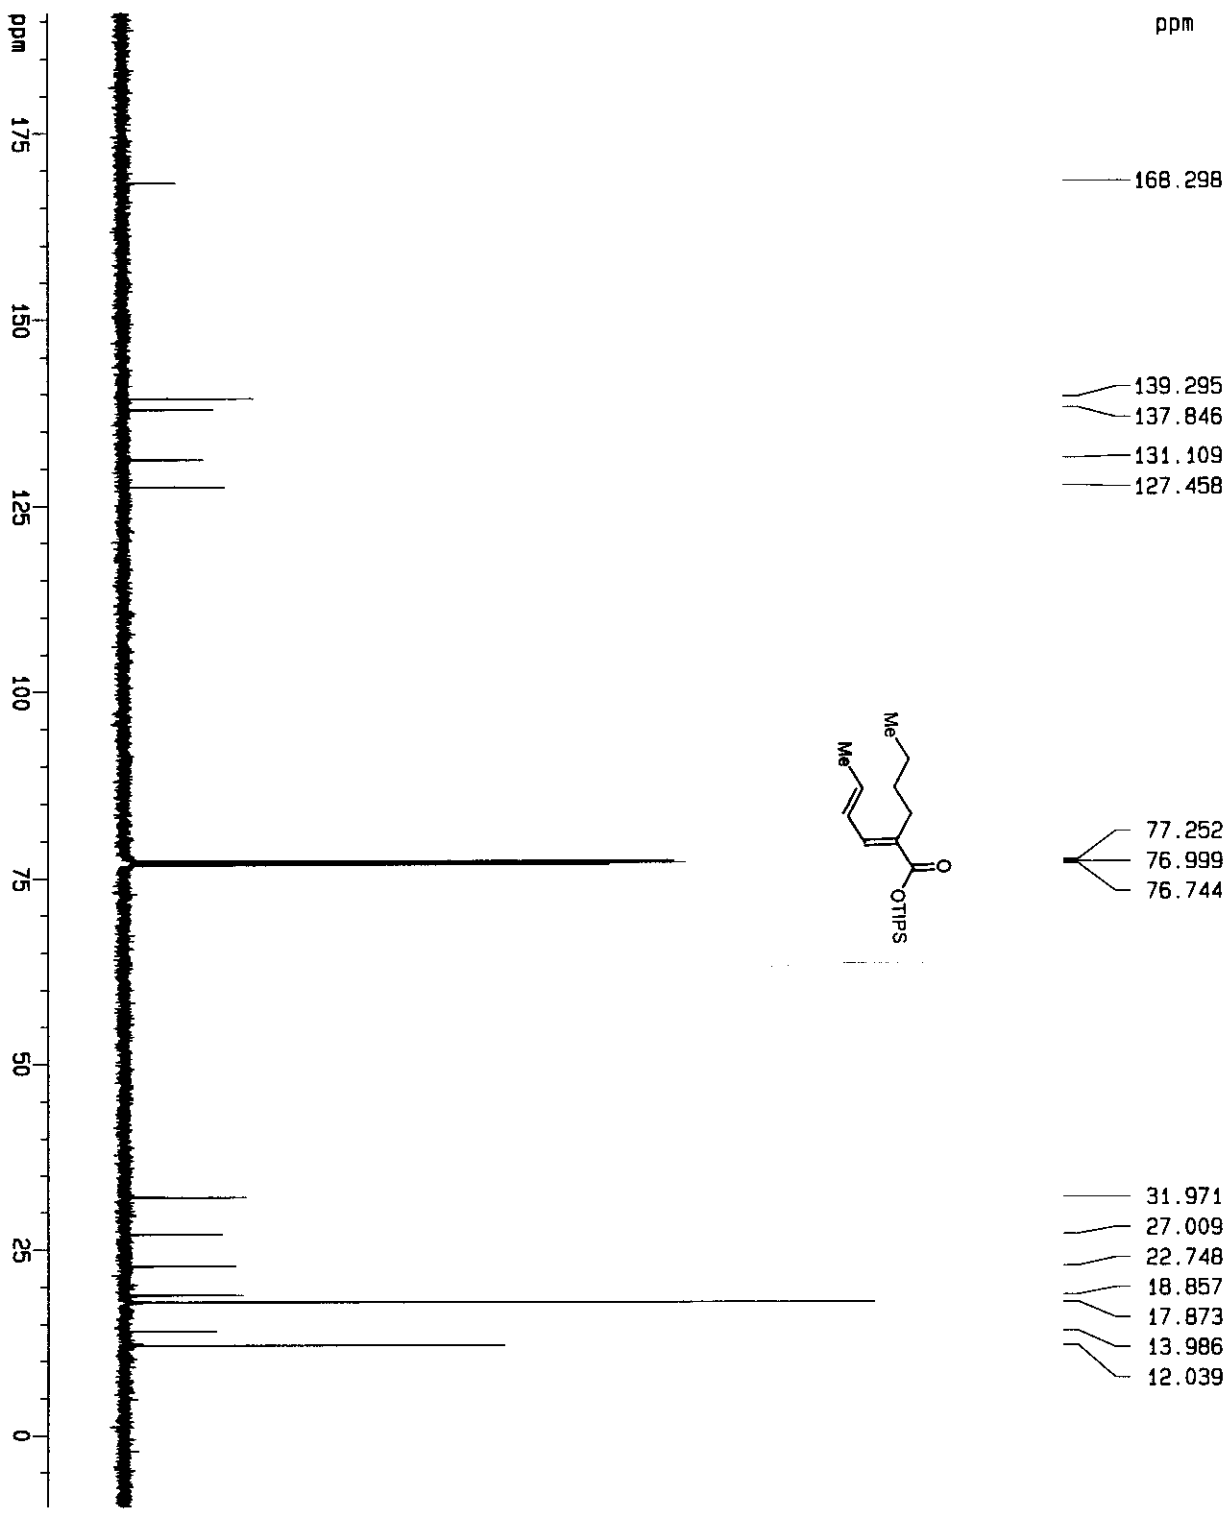

Current Data Parameters  
 NAME crotonalid\_pdt  
 EXPNO 2  
 PROCNO 1

F2 - Acquisition Parameters

Date\_ 20051214  
 Time 22.38  
 INSTRUM spect  
 PROBHD 5 mm QNP 1H  
 PULPROG zgpg30  
 TD 238090  
 SOLVENT Aceton  
 NS 48  
 DS 0  
 SMI 39582.539 Hz  
 FIDRES 0.166670 Hz  
 AQ 2.9999840 sec  
 RG 8192  
 DM 12.600 usec  
 DE 7.50 usec  
 TE 300.0 K  
 D1 4.00000000 sec  
 d11 0.03000000 sec

\*\*\*\*\* CHANNEL f1 \*\*\*\*\*  
 NUC1 13C  
 P1 8.20 usec  
 PL1 0.00 dB  
 SFO1 125.7736214 MHz

\*\*\*\*\* CHANNEL f2 \*\*\*\*\*  
 CPDPRG2 waltz16  
 NUC2 1H  
 P2 90.00 usec  
 PL2 120.00 dB  
 PL12 19.00 dB  
 SFO2 500.1338000 MHz

F2 - Processing parameters

SI 32768  
 SF 125.7577910 MHz  
 MDW EM  
 SSB 0  
 LB 1.00 Hz  
 GB 0  
 PC 1.40

1D NMR plot parameters

CX 20.00 cm  
 F1P 191.048 ppm  
 F1 24025.77 Hz  
 F2P -9.599 ppm  
 F2 -1207.15 Hz  
 PPMCM 10.03235 ppm/cm  
 HZCM 1261.64600 Hz/cm

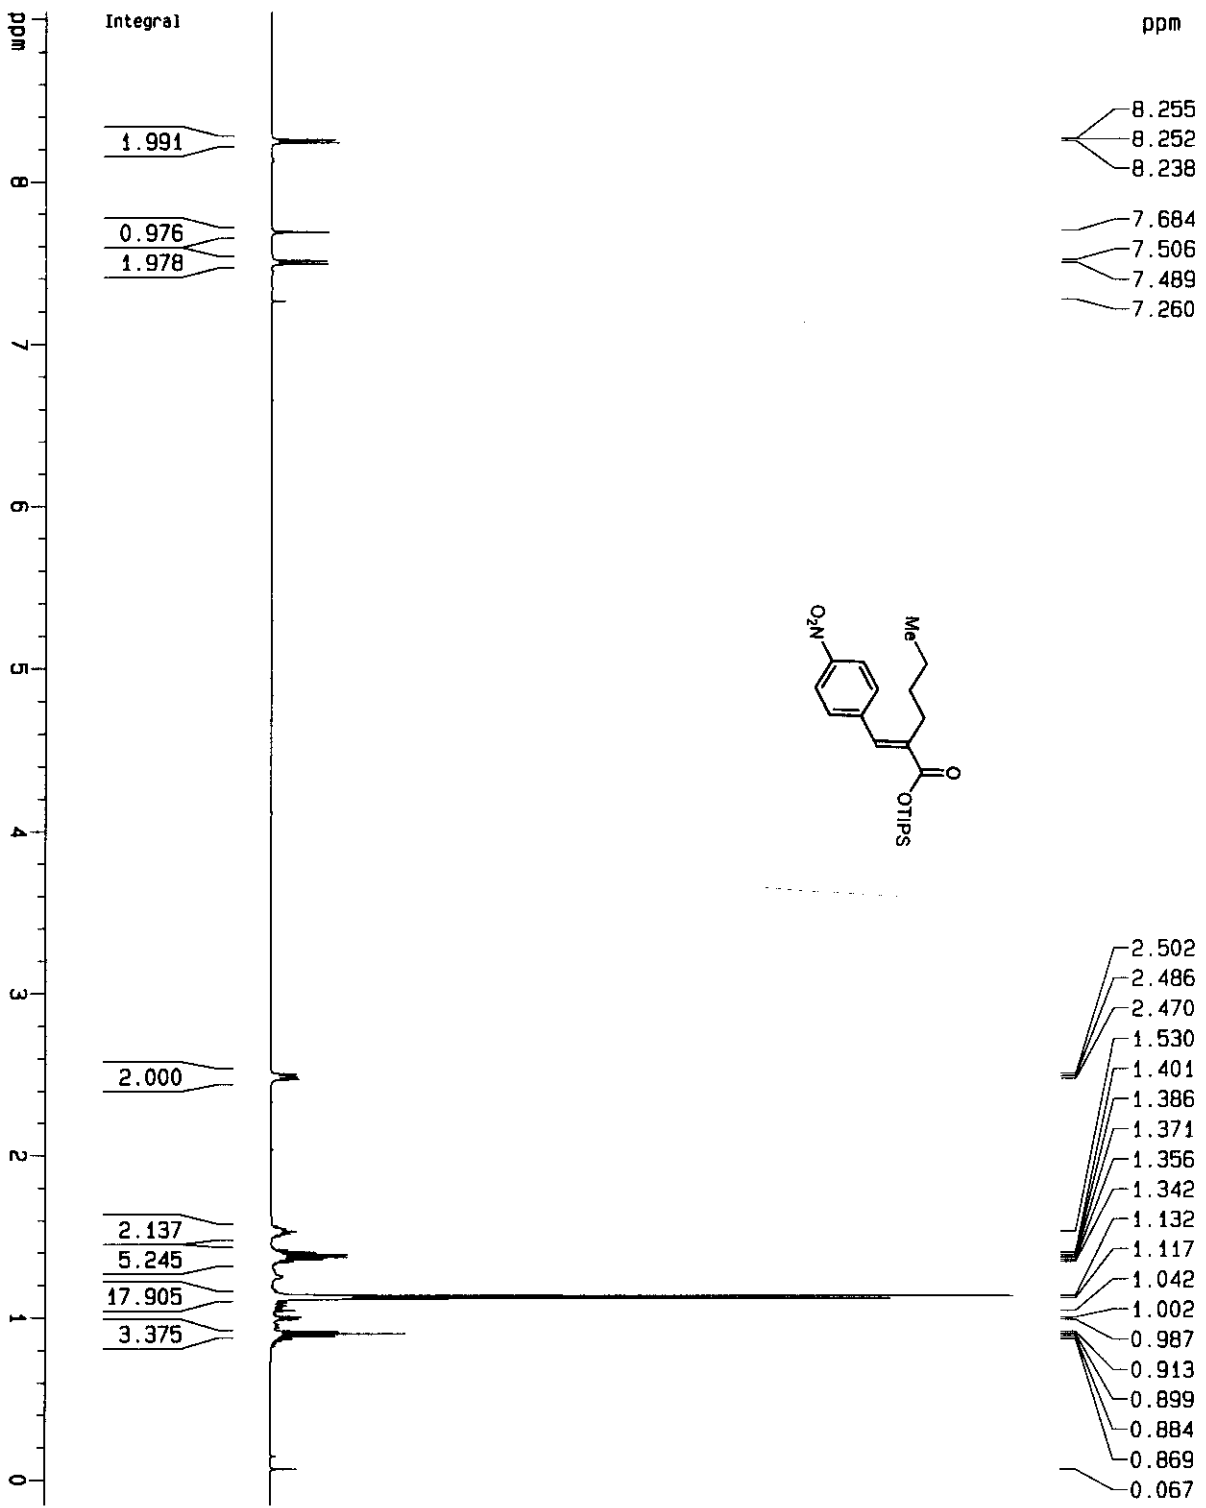

Current Data Parameters  
 NAME Nitrobenz\_pdt  
 EXPNO 2  
 PROCNO 1

F2 - Acquisition Parameters  
 Date\_ 20051213  
 Time 16.53  
 INSTRUM spect  
 PROBHD 5 mm QNP 1H  
 PULPROG zg  
 TD 32768  
 SOLVENT CDCl3  
 NS 4  
 DS 0  
 SMH 8012.820 Hz  
 FIDRES 0.244532 Hz  
 AQ 2.044731 sec  
 RG 32  
 DW 62.400 usec  
 DE 4.50 usec  
 TE 300.0 K  
 D1 30.00000000 sec

==== CHANNEL f1 =====  
 NUC1 1H  
 P1 10.00 usec  
 PL1 0.00 dB  
 SF01 500.1337510 MHz

F2 - Processing parameters  
 SI 16384  
 SF 500.1300129 MHz  
 MDH EM  
 SSB 0  
 LB 0.30 Hz  
 GB 0  
 PC 1.00

1D NMR plot parameters  
 CX 20.00 cm  
 F1P 9.041 ppm  
 F1 4521.91 Hz  
 F2P -0.153 ppm  
 F2 -76.75 Hz  
 PPMCM 0.45975 ppm/cm  
 HZCM 229.93309 Hz/cm

ppm

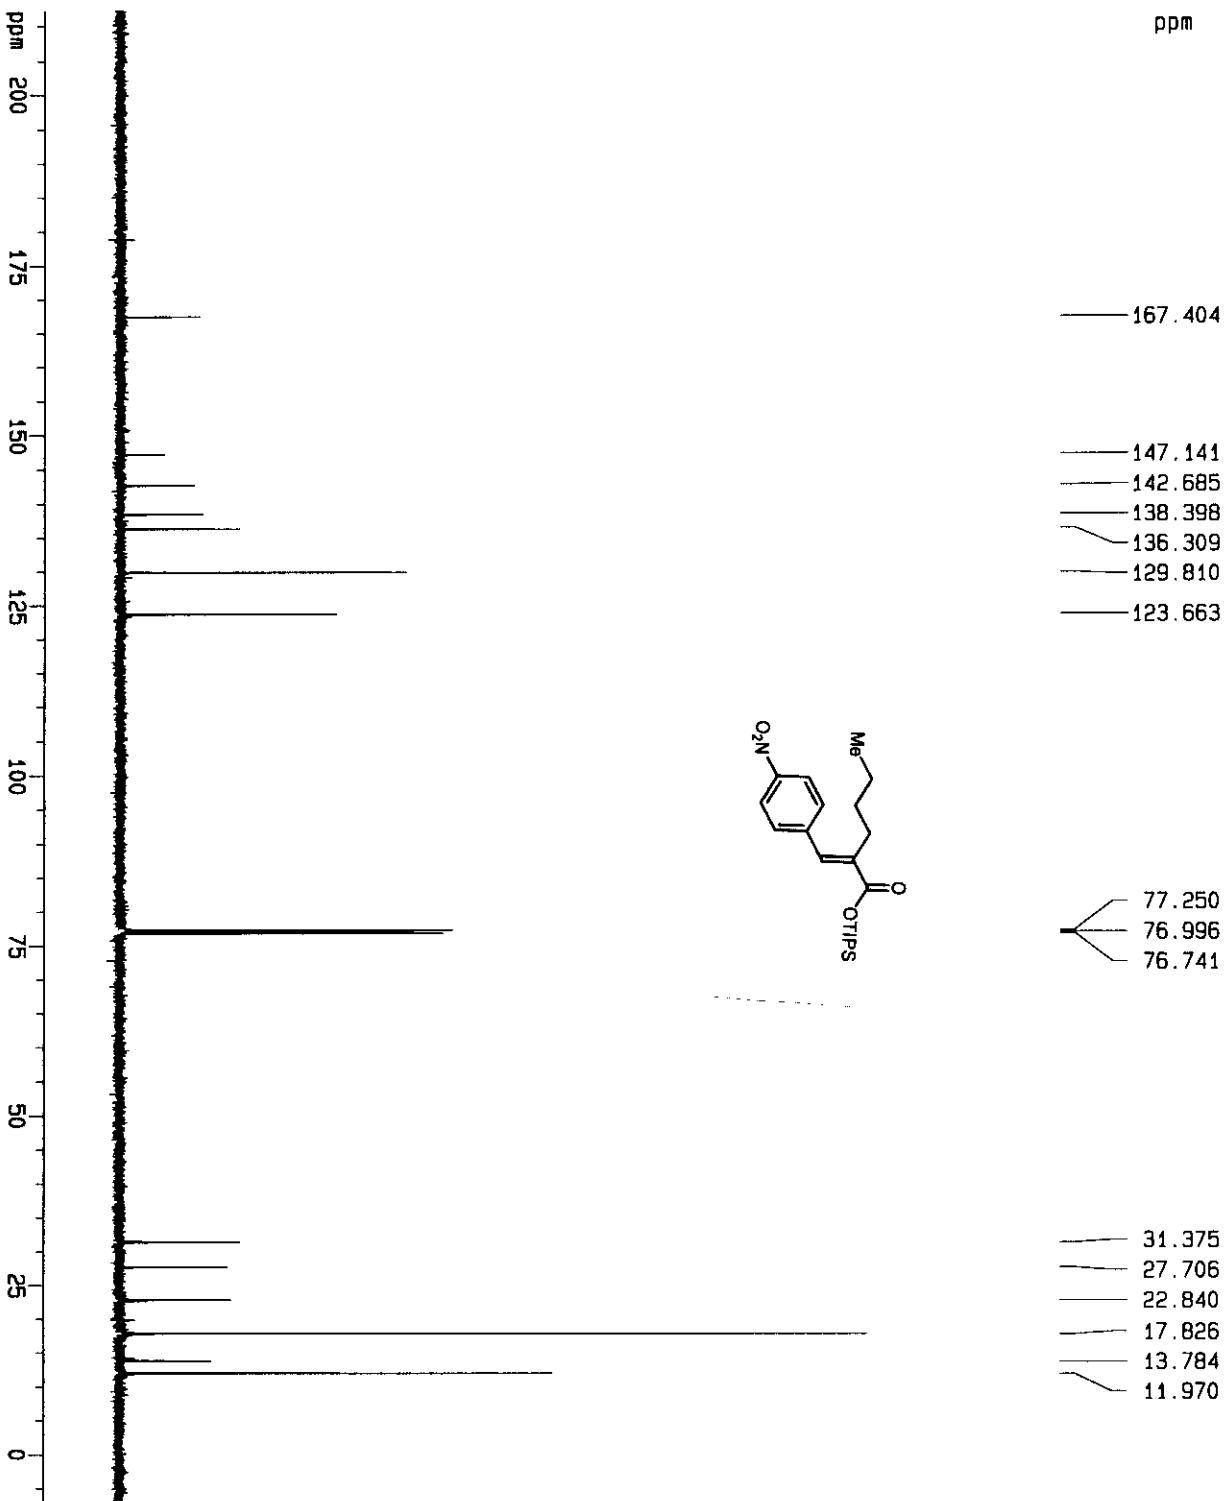

Current Data Parameters  
 NAME nitrobenz\_pdt  
 EXPNO 3  
 PROCNO 1

F2 - Acquisition Parameters

Date\_ 20051213  
 Time 16:57  
 INSTRUM spect  
 PROBHD 5 mm QNP 1H  
 PULPROG zgdc  
 TD 238090  
 SOLVENT Aceton  
 NS 31  
 DS 0  
 SMH 39682.539 Hz  
 FIDRES 0.166670 Hz  
 AQ 2.9999840 sec  
 RG 8192  
 DM 12.600 usec  
 DE 7.50 usec  
 TE 300.0 K  
 D1 4.00000000 sec  
 d11 0.03000000 sec

CHANNEL f1 -----

NUC1 13C  
 P1 8.20 usec  
 PL1 0.00 dB  
 SFO1 125.7736214 MHz

CHANNEL f2 -----

CPDPRG2 waltz16  
 NUC2 1H  
 P2 90.00 usec  
 PL2 120.00 dB  
 PL12 19.00 dB  
 SFO2 500.1338000 MHz

F2 - Processing parameters

SI 32768  
 SF 125.7577946 MHz  
 MDW EM  
 SSB 0  
 LB 1.00 Hz  
 GB 0  
 PC 1.40

1D NMR plot parameters

CX 20.00 cm  
 F1P 212.284 ppm  
 F1 26696.39 Hz  
 F2P -7.227 ppm  
 F2 -908.85 Hz  
 PPMCH 10.97556 ppm/cm  
 HZCM 1390.26233 Hz/cm



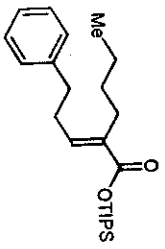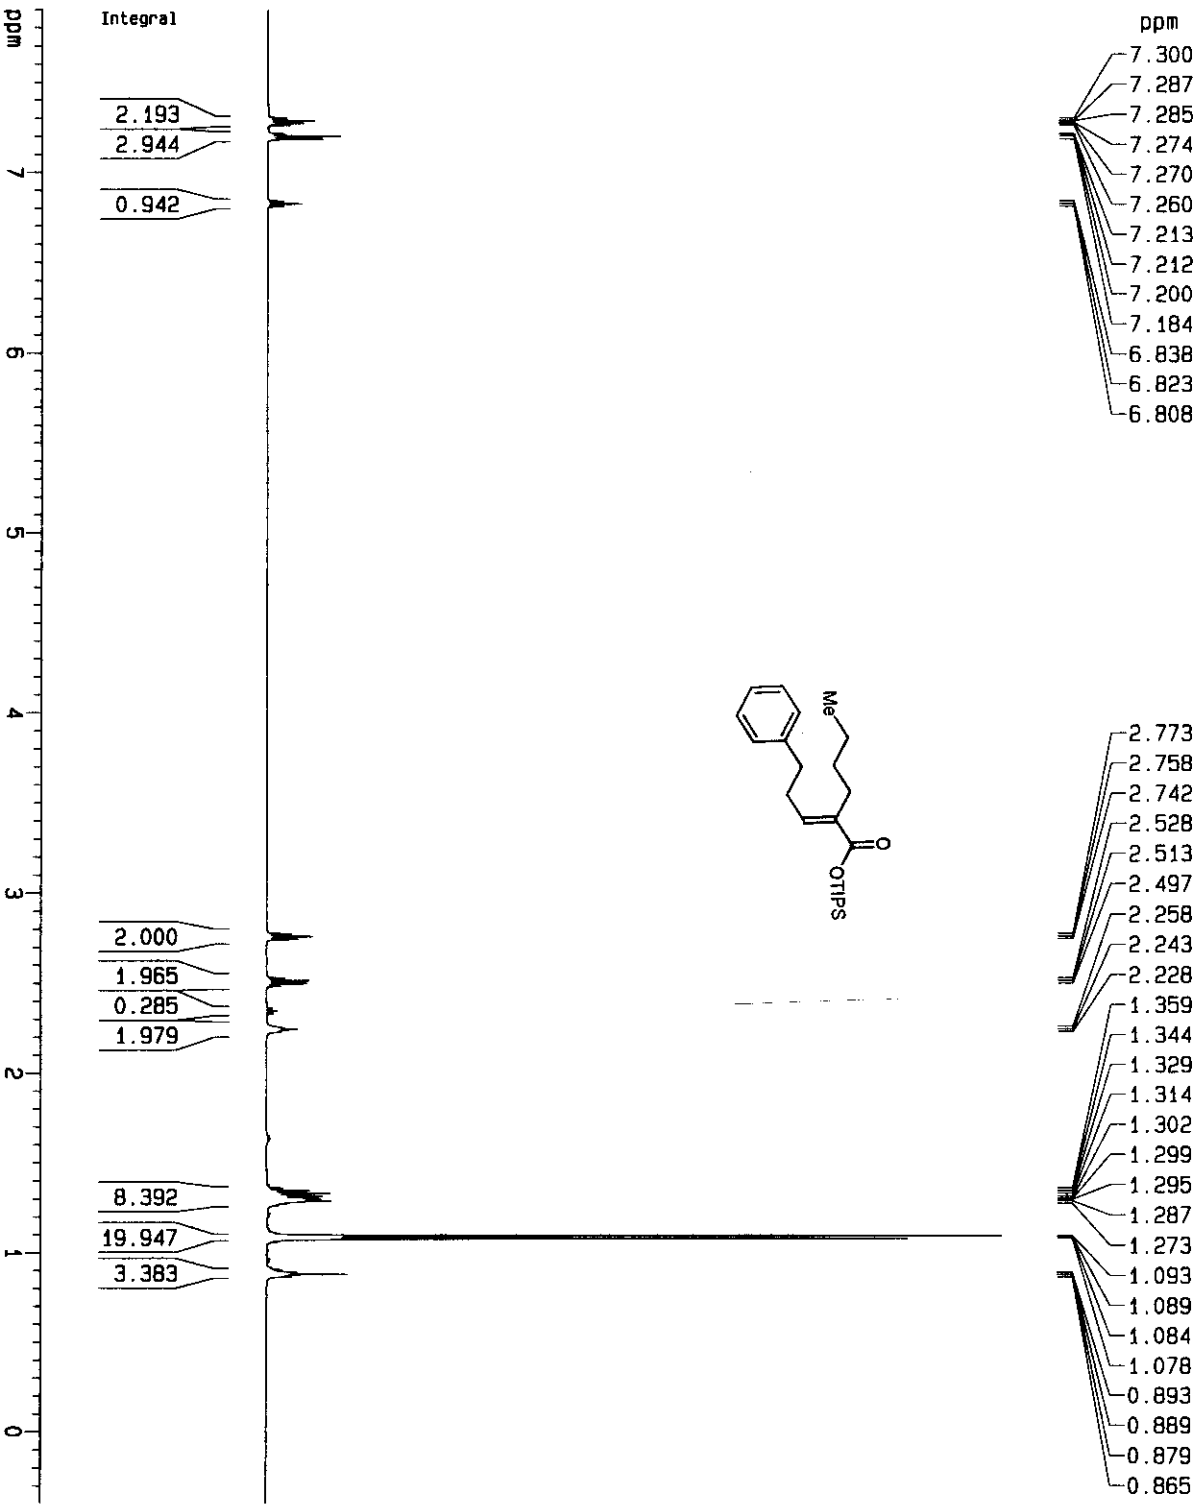

Current Data Parameters  
 NAME cinnam\_pdt  
 EXPNO 3  
 PROCNO 1

F2 - Acquisition Parameters  
 Date\_ 20051216  
 Time 19.54

INSTRUM spect  
 PROBHD 5 mm QNP 1H  
 PULPROG zg

TD 32768  
 SOLVENT CDCl3  
 NS 4

DS 0  
 SMH 5208.333 Hz  
 FIDRES 0.158946 Hz

AG 3.1457779 sec  
 RG 32  
 DW 96.000 usec

DE 4.50 usec  
 TE 300.0 K  
 D1 10.00000000 sec

\*\*\*\*\* CHANNEL f1 \*\*\*\*\*  
 NUC1 1H  
 P1 10.00 usec  
 PL1 0.00 dB  
 SF01 500.1320118 MHz

F2 - Processing Parameters  
 SI 16384  
 SF 500.1300129 MHz  
 KW EM  
 SSB 0  
 LB 0.30 Hz  
 GB 0  
 PC 1.00

1D NMR plot parameters  
 CX 20.00 cm  
 F4P 7.902 ppm  
 F1 3952.01 Hz  
 F2P -0.395 ppm  
 F2 -197.67 Hz  
 PPMCM 0.41486 ppm/cm  
 HZCM 207.48415 Hz/cm



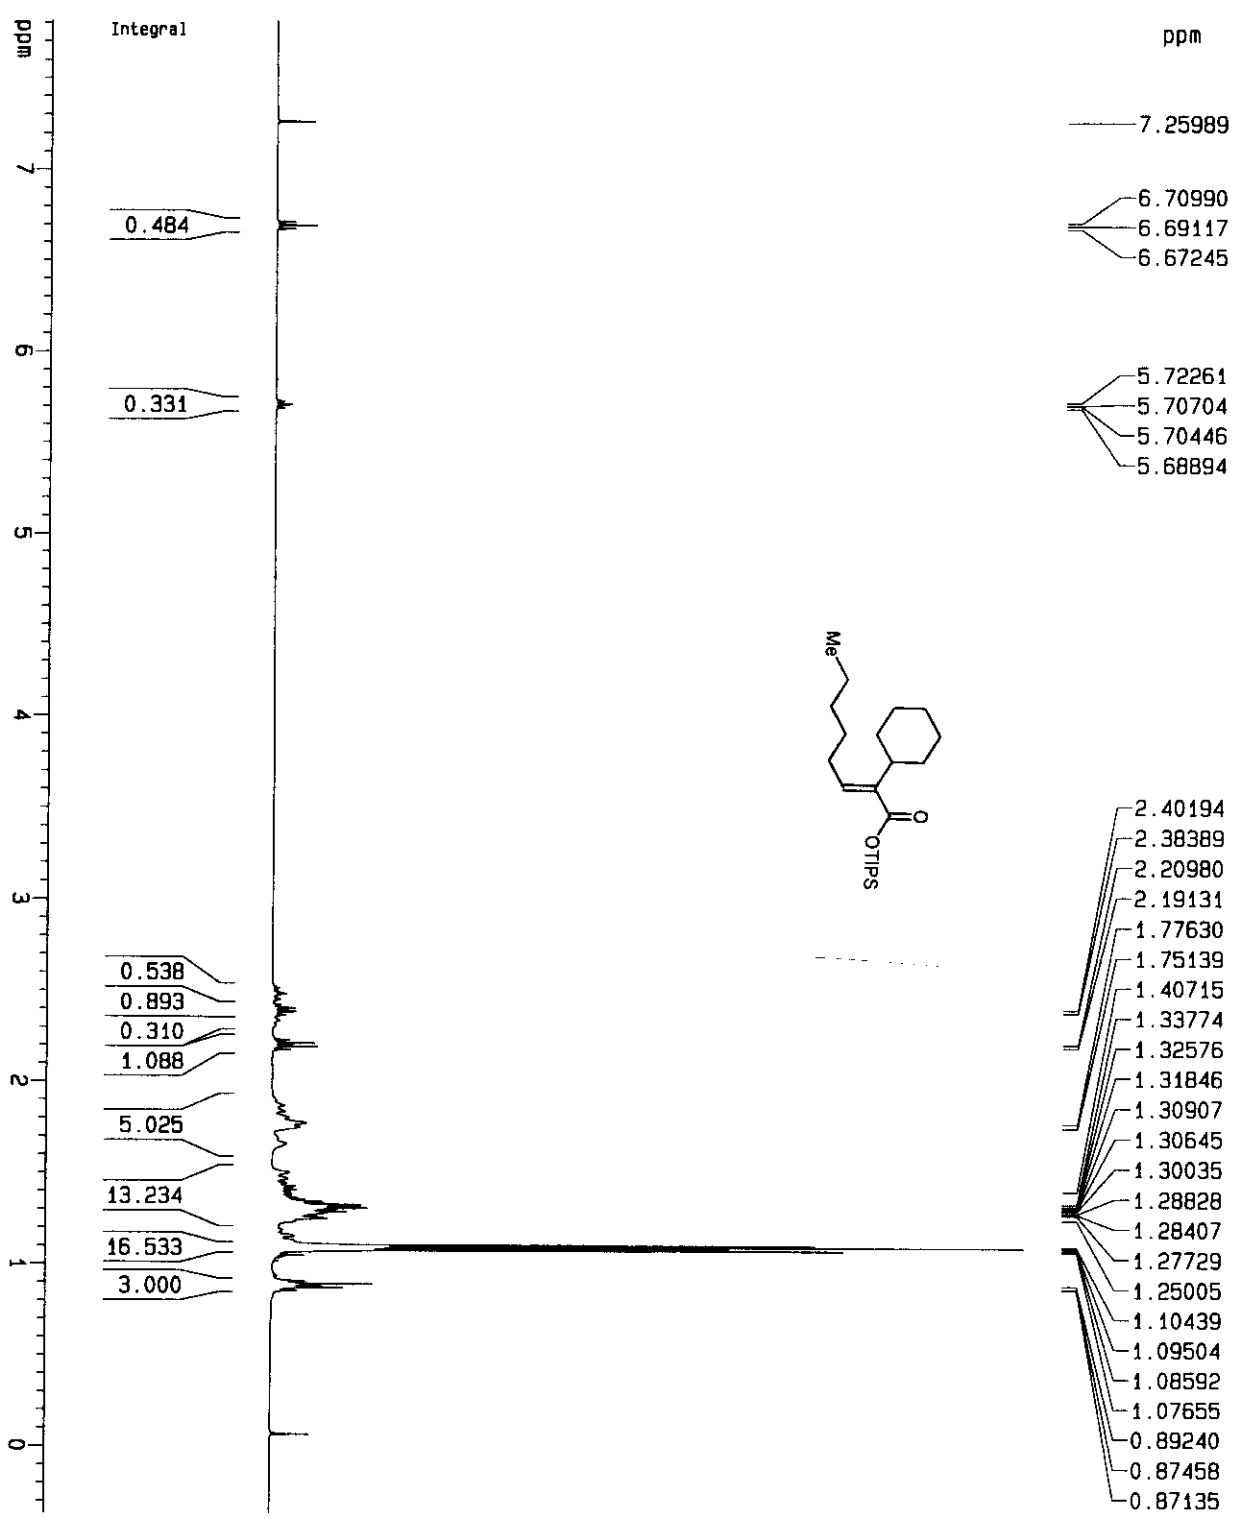

Current Data Parameters  
 NAME phenyl1\_crude  
 EXPNO 4  
 PROCNO 1

F2 - Acquisition Parameters  
 Date\_ 20051219  
 Time 11.45  
 INSTRUM spect  
 PROBD 5 mm QNP 1H  
 PULPROG zg  
 TD 16384  
 SOLVENT CDCl3  
 NS 4  
 DS 0  
 SMH 4807.692 Hz  
 FIDRES 0.293438 Hz  
 AQ 1.7039860 sec  
 RG 32  
 DW 104.000 usec  
 DE 5.00 usec  
 TE 300.0 K  
 D1 10.00000000 sec

===== CHANNEL f1 =====  
 NUC1 1H  
 P1 10.50 usec  
 PL1 0.00 dB  
 SF01 400.1320007 MHz

F2 - Processing parameters  
 SI 32768  
 SF 400.1300099 MHz  
 WDM EM  
 SSB 0  
 LB 0.30 Hz  
 GB 0  
 PC 1.00

1D NMR plot parameters  
 CX 20.00 cm  
 F1P 7.813 ppm  
 F1 3126.33 Hz  
 F2P -0.369 ppm  
 F2 -147.78 Hz  
 PPMCM 0.40913 ppm/cm  
 HZCM 163.70564 Hz/cm

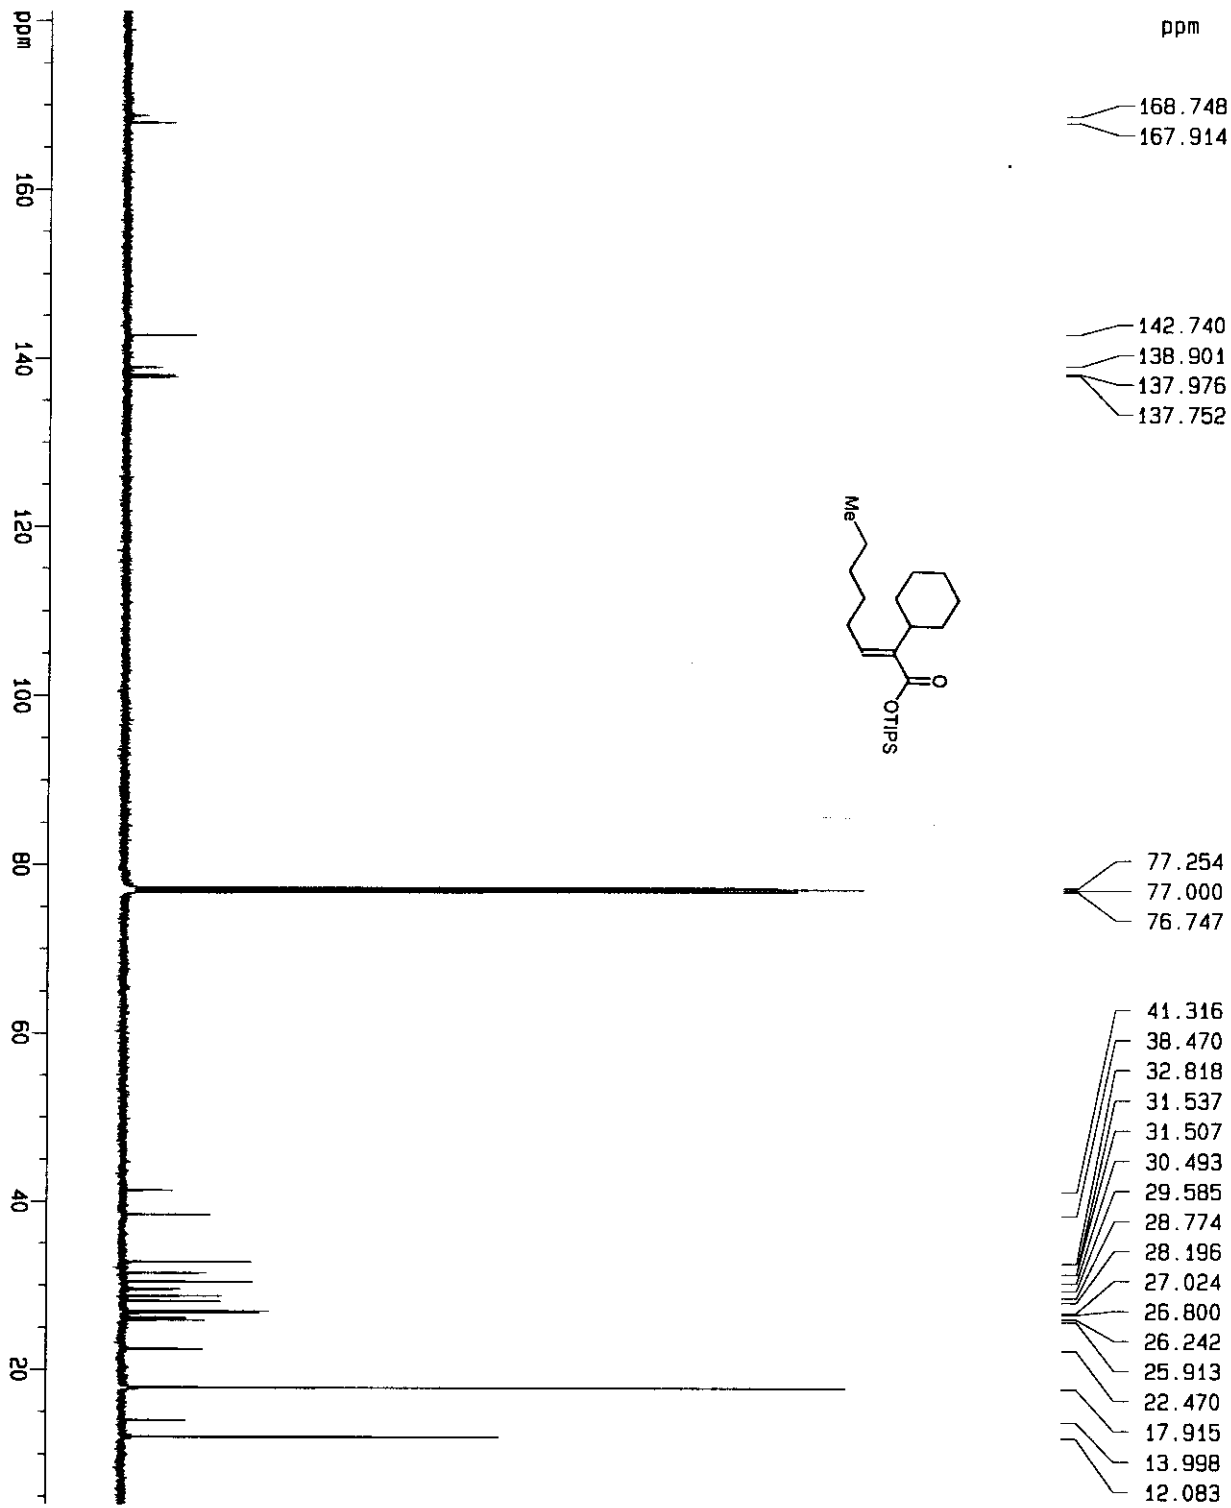

Current Data Parameters

|        |              |
|--------|--------------|
| NAME   | Cy_01e1n_jdt |
| EXPNO  | 2            |
| PROCNO | 1            |

F2 - Acquisition Parameters

|         |                |
|---------|----------------|
| Date_   | 20051219       |
| Time    | 21.29          |
| INSTRUM | spect          |
| PROBHD  | 5 mm QNP 1H    |
| PULPROG | zgdc           |
| TD      | 238090         |
| SOLVENT | Aceton         |
| NS      | 302            |
| DS      | 0              |
| SMH     | 39682.539 Hz   |
| FIDRES  | 0.166670 Hz    |
| AQ      | 2.9999940 sec  |
| RG      | 8192           |
| DM      | 12.600 usec    |
| DE      | 7.50 usec      |
| TE      | 300.0 K        |
| D1      | 4.00000000 sec |
| d11     | 0.03000000 sec |

CHANNEL f1

|      |                 |
|------|-----------------|
| NUC1 | 13C             |
| P1   | 8.20 usec       |
| PL1  | 0.00 dB         |
| SFO1 | 125.7736214 MHz |

CHANNEL f2

|         |                 |
|---------|-----------------|
| CPDPRG2 | waltz16         |
| NUC2    | 1H              |
| PCPD2   | 90.00 usec      |
| PL2     | 120.00 dB       |
| PL12    | 19.00 dB        |
| SFO2    | 500.1338000 MHz |

F2 - Processing parameters

|     |                 |
|-----|-----------------|
| SI  | 32768           |
| SF  | 125.7577922 MHz |
| WDM | EM              |
| SSB | 0               |
| LB  | 1.00 Hz         |
| GB  | 0               |
| PC  | 1.40            |

1D NMR plot parameters

|       |                  |
|-------|------------------|
| CX    | 20.00 cm         |
| F1P   | 181.092 ppm      |
| F1    | 22773.70 Hz      |
| F2P   | 4.111 ppm        |
| F2    | 516.96 Hz        |
| PPMCM | 8.84905 ppm/cm   |
| HZCM  | 1112.83655 Hz/cm |

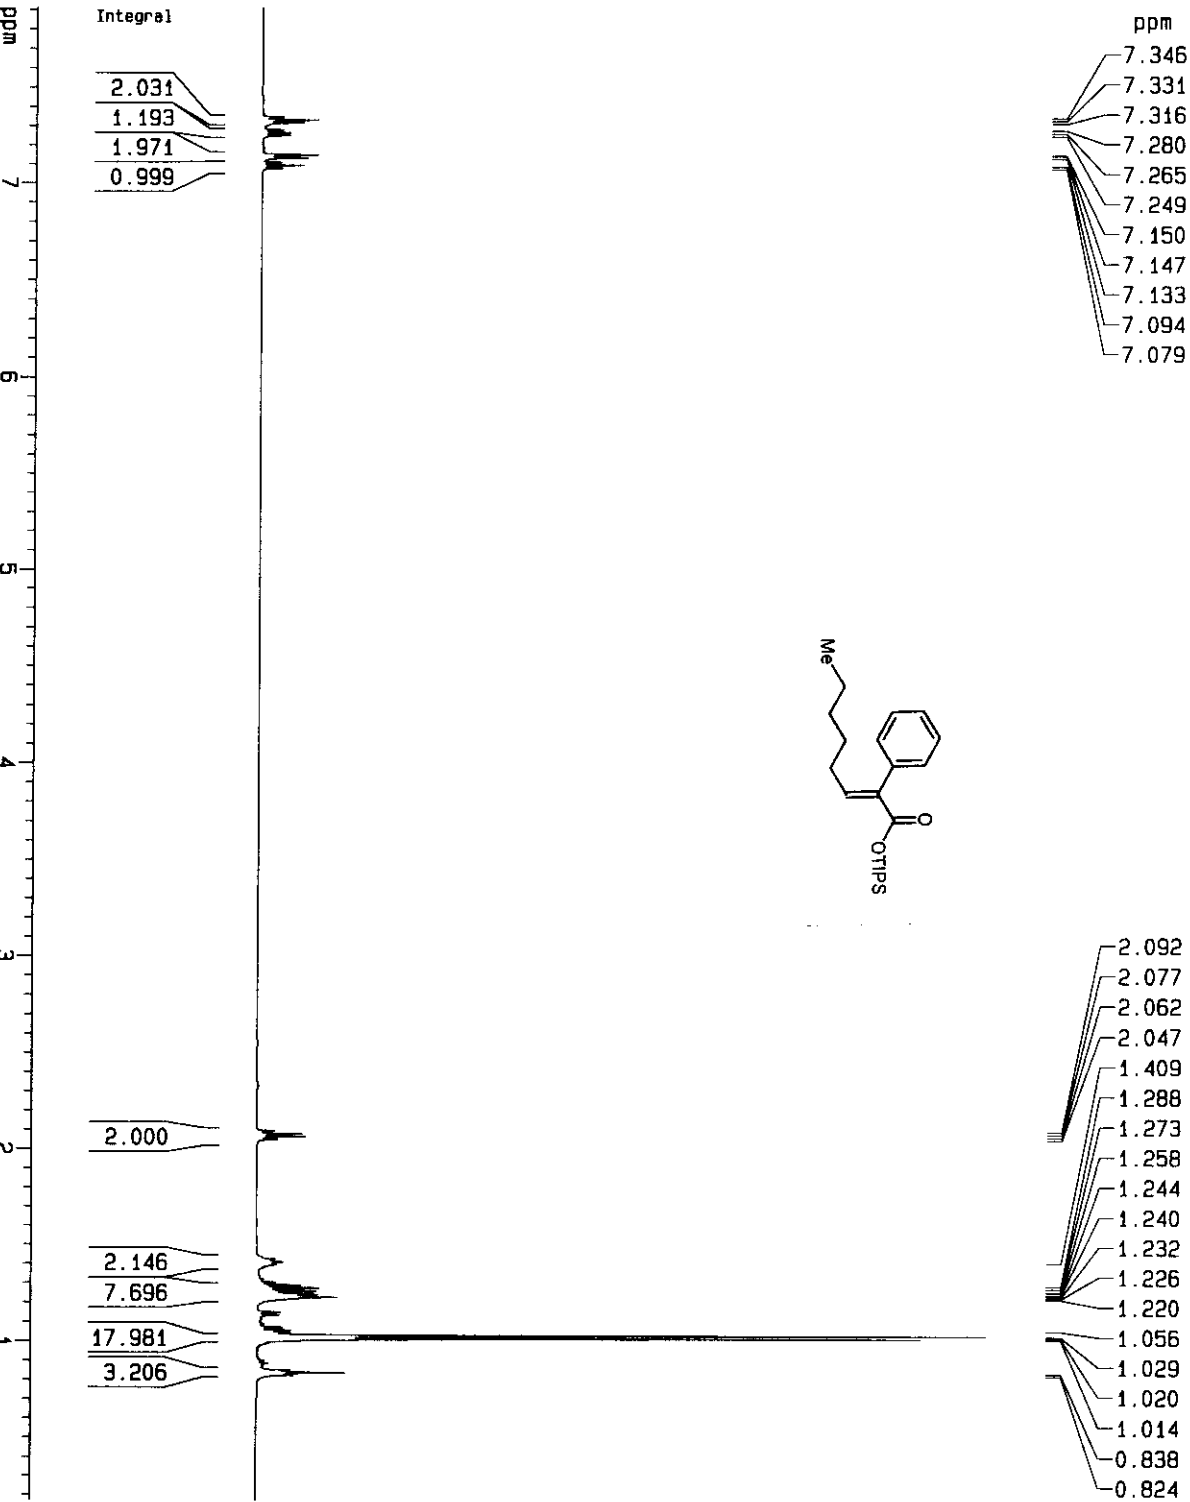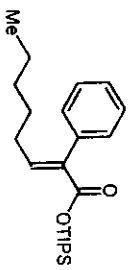

Current Data Parameters  
 NAME phenyl1\_dft  
 EXPNO 1  
 PROCNO 1

F2 - Acquisition Parameters  
 Date\_ 20051219  
 Time 20.57  
 INSTRUM spect  
 PROBHD 5 mm QNP 1H  
 PULPROG zg  
 TD 32768  
 SOLVENT CDCl3  
 NS 4  
 DS 0  
 SWH 5208.333 Hz  
 FIDRES 0.158946 Hz  
 AQ 3.1457779 sec  
 RG 32  
 DW 96.000 usec  
 DE 4.50 usec  
 TE 300.0 K  
 D1 10.00000000 sec

===== CHANNEL f1 =====  
 NUC1 1H  
 P1 10.00 usec  
 PL1 0.00 dB  
 SF01 500.1320118 MHz

F2 - Processing parameters  
 SI 16384  
 SF 500.1300181 MHz  
 MDW EM  
 SSB 0  
 LB 0.30 Hz  
 GB 0  
 PC 1.00

1D NMR plot parameters  
 CX 20.00 cm  
 F1P 7.914 ppm  
 F1 3958.17 Hz  
 F2P 0.172 ppm  
 F2 85.89 Hz  
 PPM/CW 0.38713 ppm/cm  
 HZ/CW 193.61412 Hz/cm

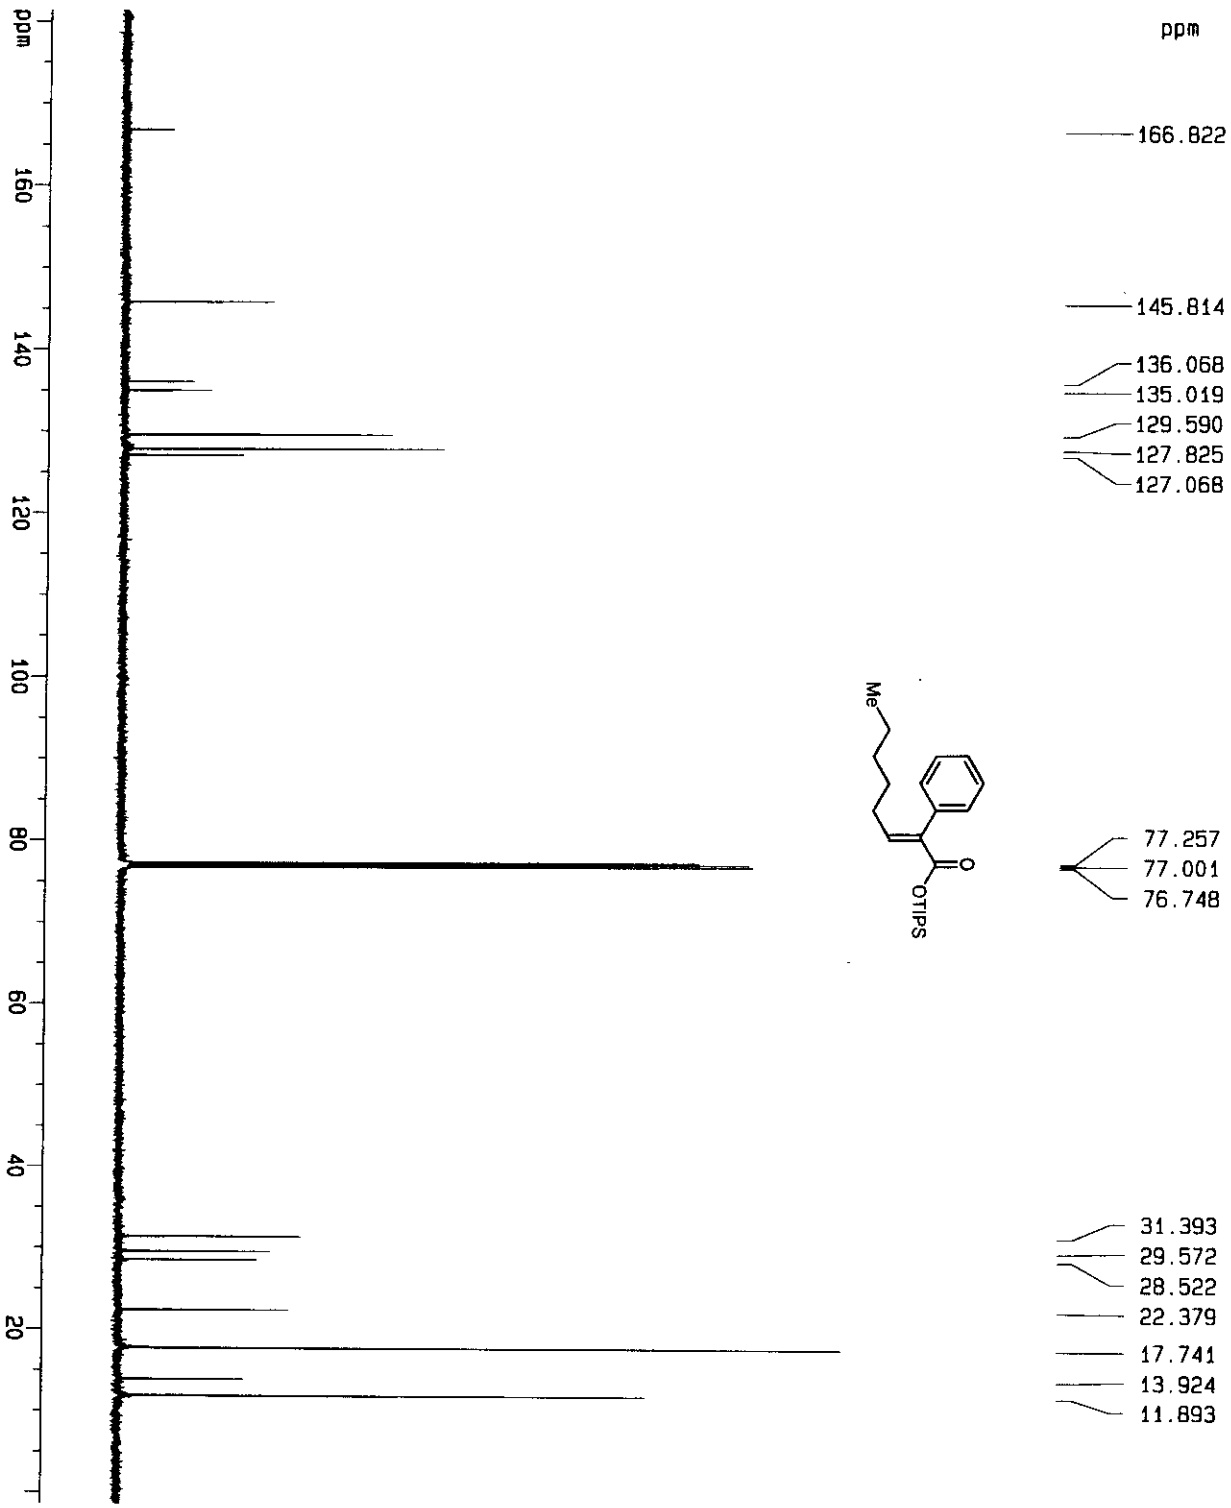

Current Data Parameters  
 NAME phenyl1.pdt  
 EXPNO 2  
 PROCNO 1

F2 - Acquisition Parameters  
 Date\_ 20051219  
 Time 20.32  
 INSTRUM spect  
 PROBHD 5 mm QNP 1H  
 PULPROG zgpg30  
 TD 238090  
 SOLVENT Acetone  
 NS 185  
 DS 0  
 SMH 39682.539 Hz  
 FIDRES 0.166670 Hz  
 AQ 2.9999640 sec  
 RG 8192  
 DM 12.600 usec  
 DE 7.50 usec  
 TE 300.0 K  
 D1 4.00000000 sec  
 d11 0.03000000 sec

CHANNEL f1  
 NUC1 13C  
 P1 8.20 usec  
 PL1 0.00 dB  
 SF01 125.7736214 MHz

CHANNEL f2  
 CPDPRG2 waltz16  
 NUC2 1H  
 PCPD2 90.00 usec  
 PL2 120.00 dB  
 PL12 19.00 dB  
 SF02 500.1338000 MHz

F2 - Processing parameters  
 SI 32768  
 SF 125.7577934 MHz  
 MIDW EH  
 SSB 0  
 LB 1.00 Hz  
 GB 0  
 PC 1.40

1D NMR plot parameters  
 CX 20.00 cm  
 F1P 181.425 ppm  
 F1 22815.62 Hz  
 F2P -1.387 ppm  
 F2 -174.38 Hz  
 PPMCH 9.14058 ppm/cm  
 HZCM 1149.49663 Hz/cm

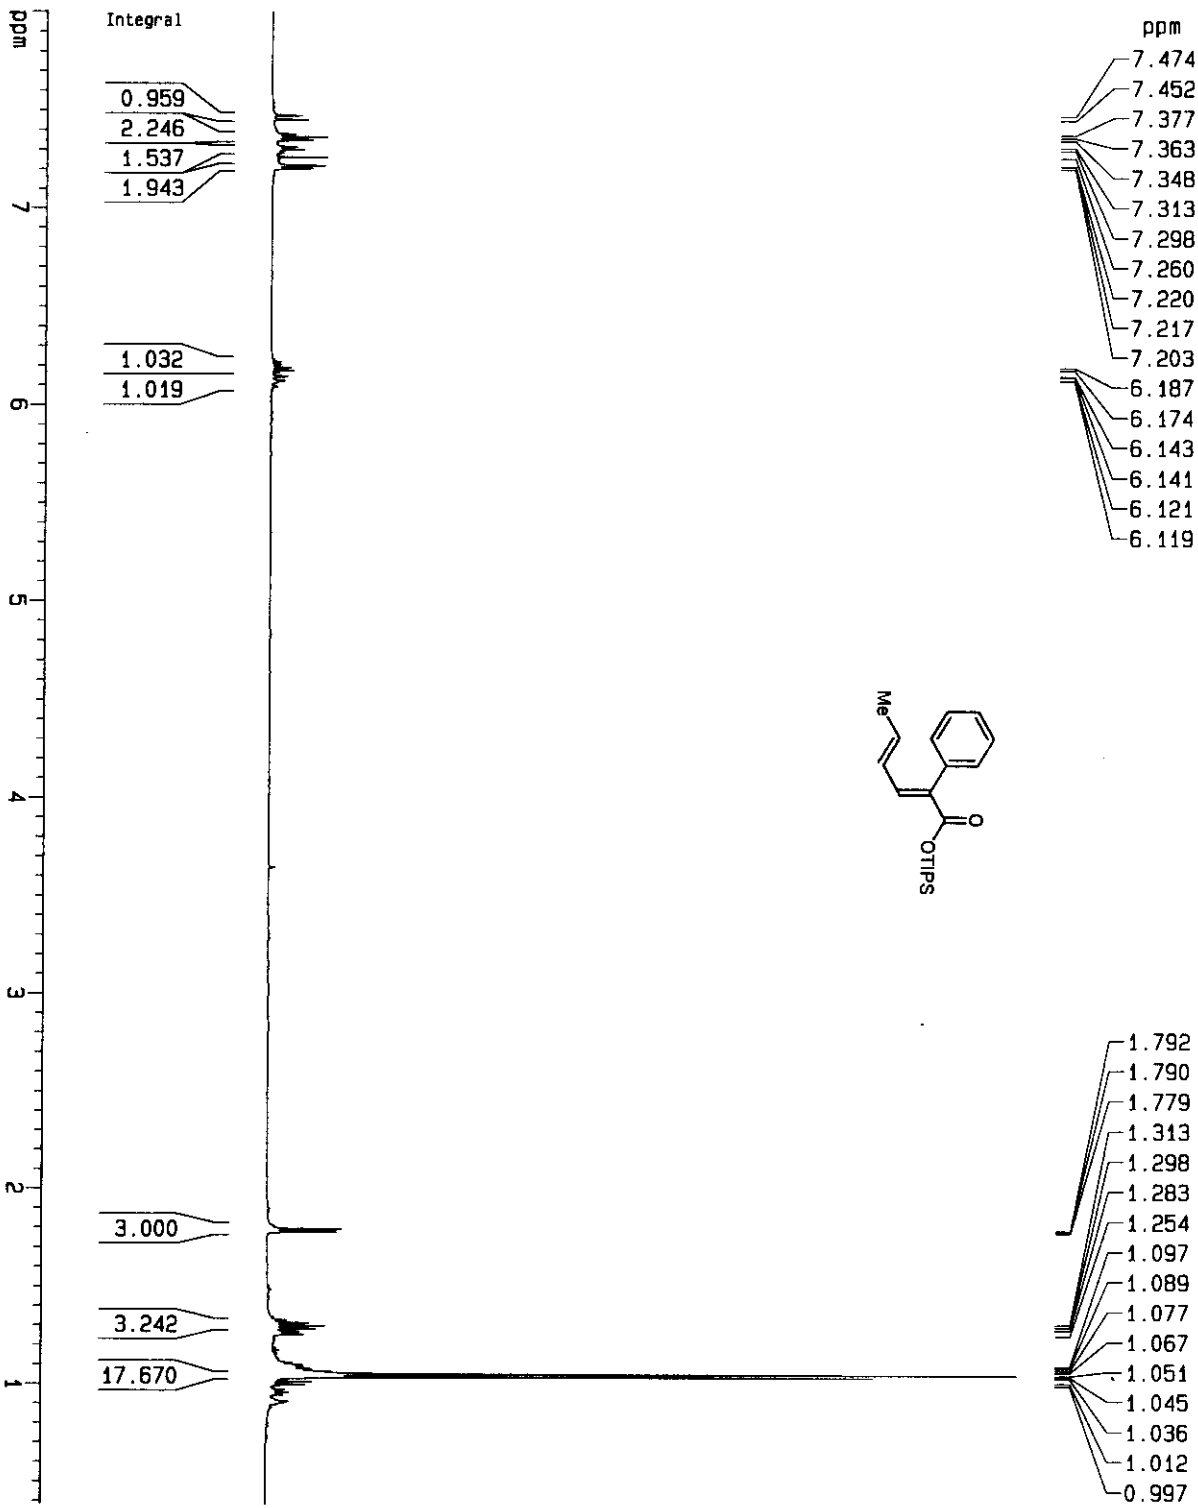

ppm  
 7.474  
 7.452  
 7.377  
 7.363  
 7.348  
 7.313  
 7.298  
 7.260  
 7.220  
 7.217  
 7.203  
 6.187  
 6.174  
 6.143  
 6.141  
 6.121  
 6.119

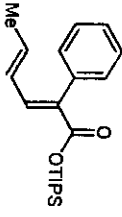

1.792  
 1.790  
 1.779  
 1.313  
 1.298  
 1.283  
 1.254  
 1.097  
 1.089  
 1.077  
 1.067  
 1.051  
 1.045  
 1.036  
 1.012  
 0.997

Current Data Parameters  
 NAME phesi\_croton1  
 EXRNO 1  
 PROCNO 1

F2 - Acquisition Parameters  
 Date\_ 20051230  
 Time 18.53  
 INSTRUM spect  
 PROBHD 5 mm QNP 1H  
 PULPROG zg  
 TD 32768  
 SOLVENT CDCl3  
 NS 4  
 DS 0  
 SMH 5208.333 Hz  
 FIDRES 0.158946 Hz  
 AQ 3.1457779 sec  
 RG 128  
 DM 96.000 usec  
 DE 4.50 usec  
 TE 300.0 K  
 D1 10.00000000 sec

===== CHANNEL f1 =====  
 NUC1 1H  
 P1 10.00 usec  
 PL1 0.00 dB  
 SF01 500.1320118 MHz

F2 - Processing Parameters  
 SI 16384  
 SF 500.1300151 MHz  
 MDW EM  
 SSB 0  
 LB 0.30 Hz  
 GB 0  
 PC 1.00

1D NMR plot parameters  
 CX 20.00 cm  
 F1P 8.004 ppm  
 F1 4002.96 Hz  
 F2P 0.383 ppm  
 F2 191.57 Hz  
 PPMCM 0.38104 ppm/cm  
 HZCM 190.56982 Hz/cm

ppm

167.22

141.28

139.61

135.88

131.67

130.11

128.42

128.05

127.83

127.23

77.33

77.00

76.69

29.70

18.84

17.79

17.73

17.64

12.07

11.93

11.82

11.76

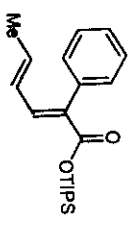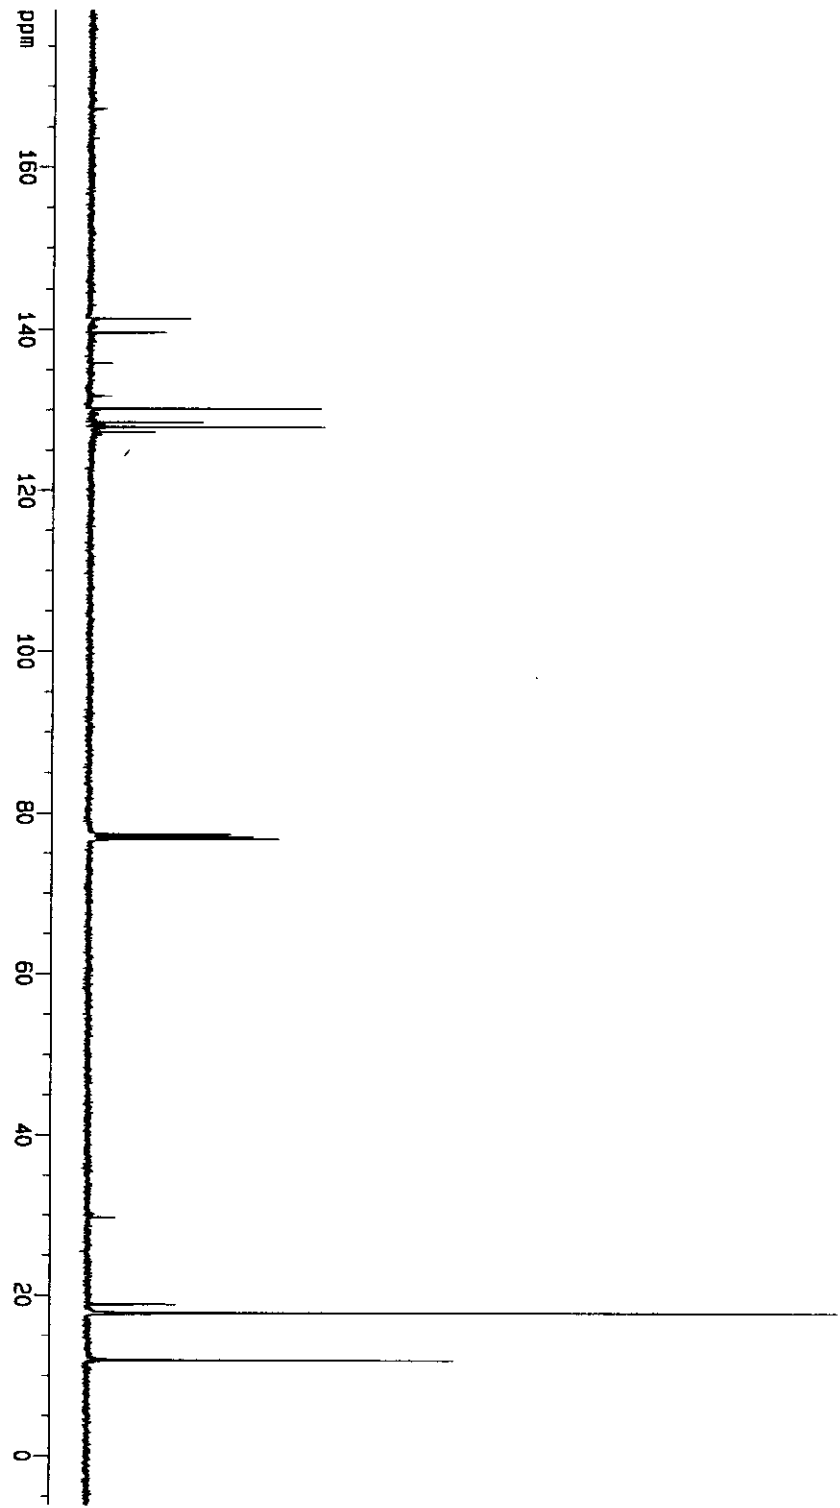

Current Data Parameters

NAME phesi\_cproton1

EXPNO 1

PROCNO 1

F2 - Acquisition Parameters

Date\_ 20051230

Time 19.09

INSTRUM spect

PROBHD 5 mm QNP 1H

PULPROG zgpg

TD 121208

SOLVENT CDCl3

NS 1024

DS 0

SMH 30303.031 HZ

FIDRES 0.250008 HZ

AQ 1.9999820 sec

RG 2048

DW 16.500 usec

DE 7.50 usec

TE 300.0 K

D1 3.00000000 sec

d11 0.03000000 sec

\*\*\*\*\* CHANNEL f1 \*\*\*\*\*

NUC1 13C

P1 11.00 usec

PL1 -2.00 dB

SFO1 100.6258087 MHz

\*\*\*\*\* CHANNEL f2 \*\*\*\*\*

CPDPRG2 waltz16

NUC2 1H

PCPD2 101.00 usec

PL2 120.00 dB

PL12 19.00 dB

SFO2 400.1324710 MHz

F2 - Processing parameters

SI 16384

SF 100.6127718 MHz

MOM EM

SSB 0

LB 1.00 Hz

GB 0

PC 1.00

1D NMR plot parameters

CX 20.00 cm

F1P 179.422 ppm

F1 18052.11 Hz

F2P -6.076 ppm

F2 -611.35 Hz

PPMCK 9.27489 ppm/cm

HZCK 933.17279 Hz/cm



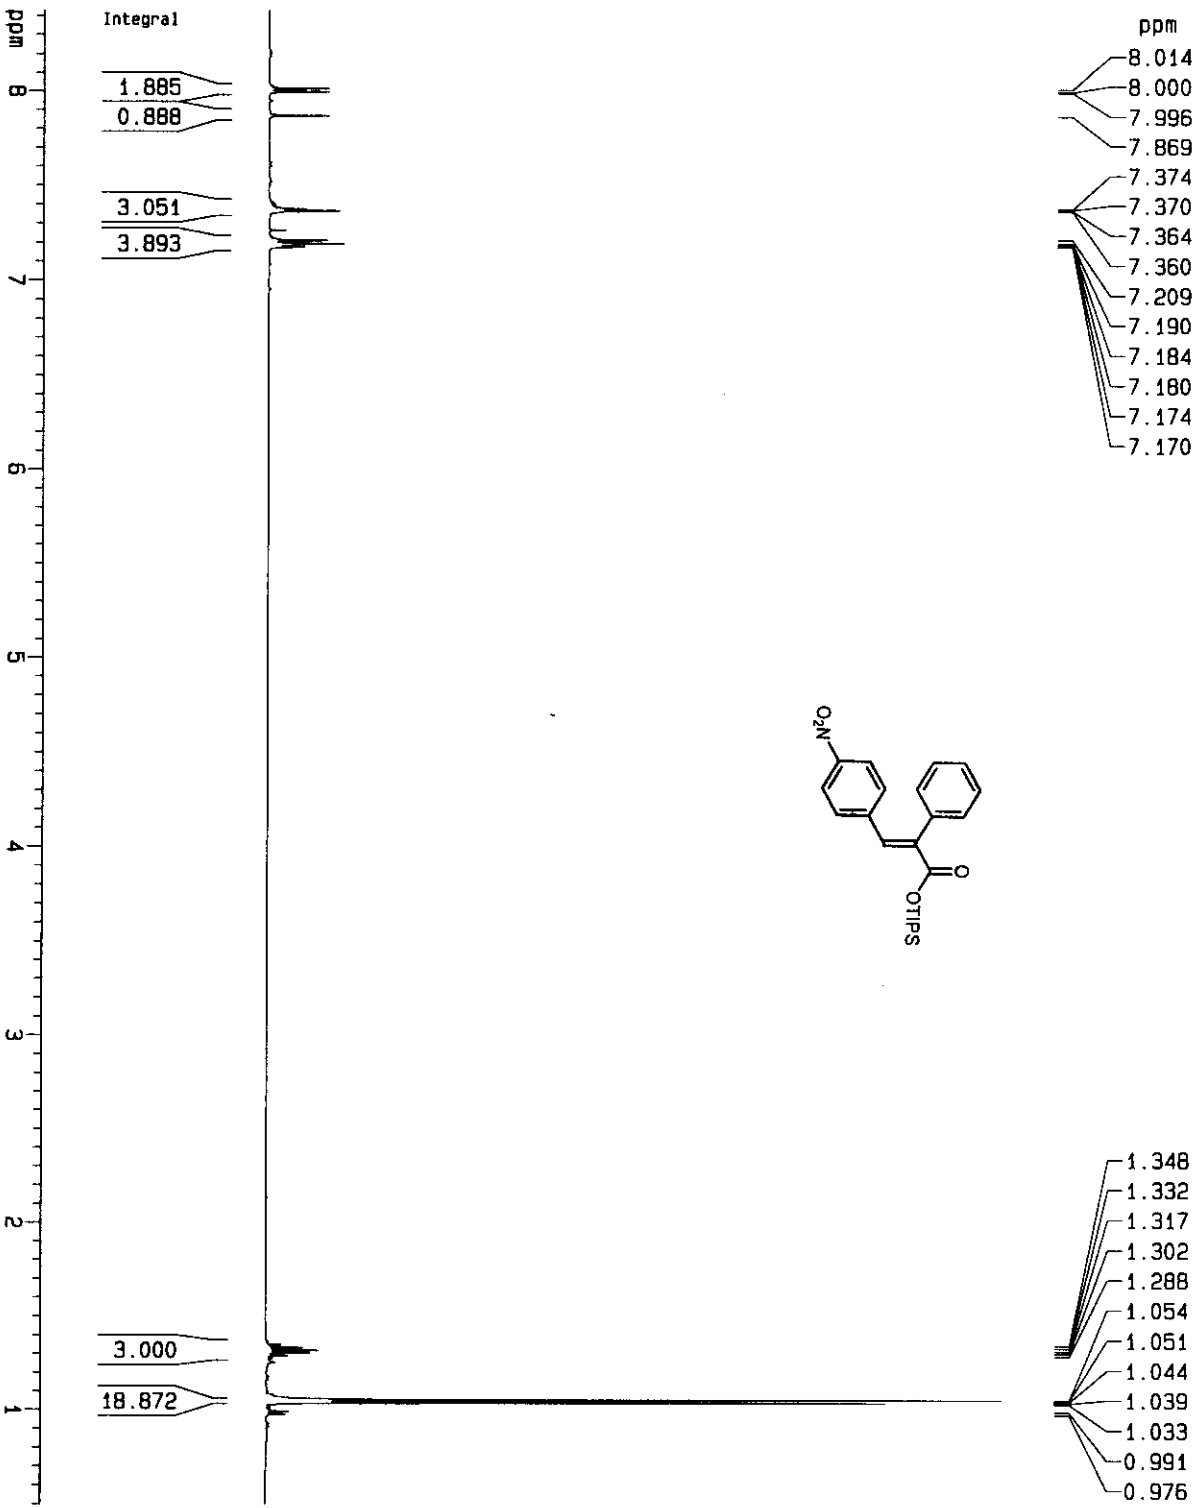

ppm

- 8.014
- 8.000
- 7.996
- 7.869
- 7.374
- 7.370
- 7.364
- 7.360
- 7.209
- 7.190
- 7.184
- 7.180
- 7.174
- 7.170

Integral

- 1.885
- 0.888
- 3.051
- 3.893

- 1.348
- 1.332
- 1.317
- 1.302
- 1.288
- 1.054
- 1.051
- 1.044
- 1.039
- 1.033
- 0.991
- 0.976

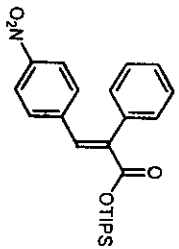

Current Data Parameters

NAME phesi\_NO2benz

EXPNO 1

PROCNO 1

F2 - Acquisition Parameters

Date\_ 20051230

Time 16.22

INSTRUM spect

PROBHD 5 mm QNP 1H

PULPROG zg

TD 32768

SOLVENT CDCl3

NS 4

DS 0

SMH 5208.333 Hz

FIDRES 0.158946 Hz

AQ 3.1457779 sec

RG 32

DM 96.000 usec

DE 4.50 usec

TE 300.0 K

D1 10.00000000 sec

\*\*\*\*\* CHANNEL f1 \*\*\*\*\*

NUC1 1H

P1 10.00 usec

PL1 0.00 dB

SFO1 500.1320118 MHz

F2 - Processing parameters

SI 16384

SF 500.1300151 MHz

MDW EM

SSB 0

LB 0.30 Hz

GB 0

PC 1.00

1D NMR plot parameters

CX 20.00 cm

F1P 8.429 ppm

F1 4215.67 Hz

F2P 0.498 ppm

F2 249.06 Hz

PPMCM 0.39656 ppm/cm

HZCM 198.33058 Hz/cm

ppm

166.55

141.32

137.47

135.35

131.16

131.03

129.27

128.80

128.24

123.40

123.33

77.33

77.00

76.69

17.70

17.61

12.22

11.85

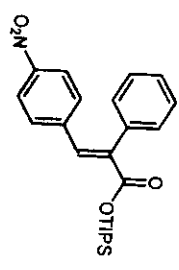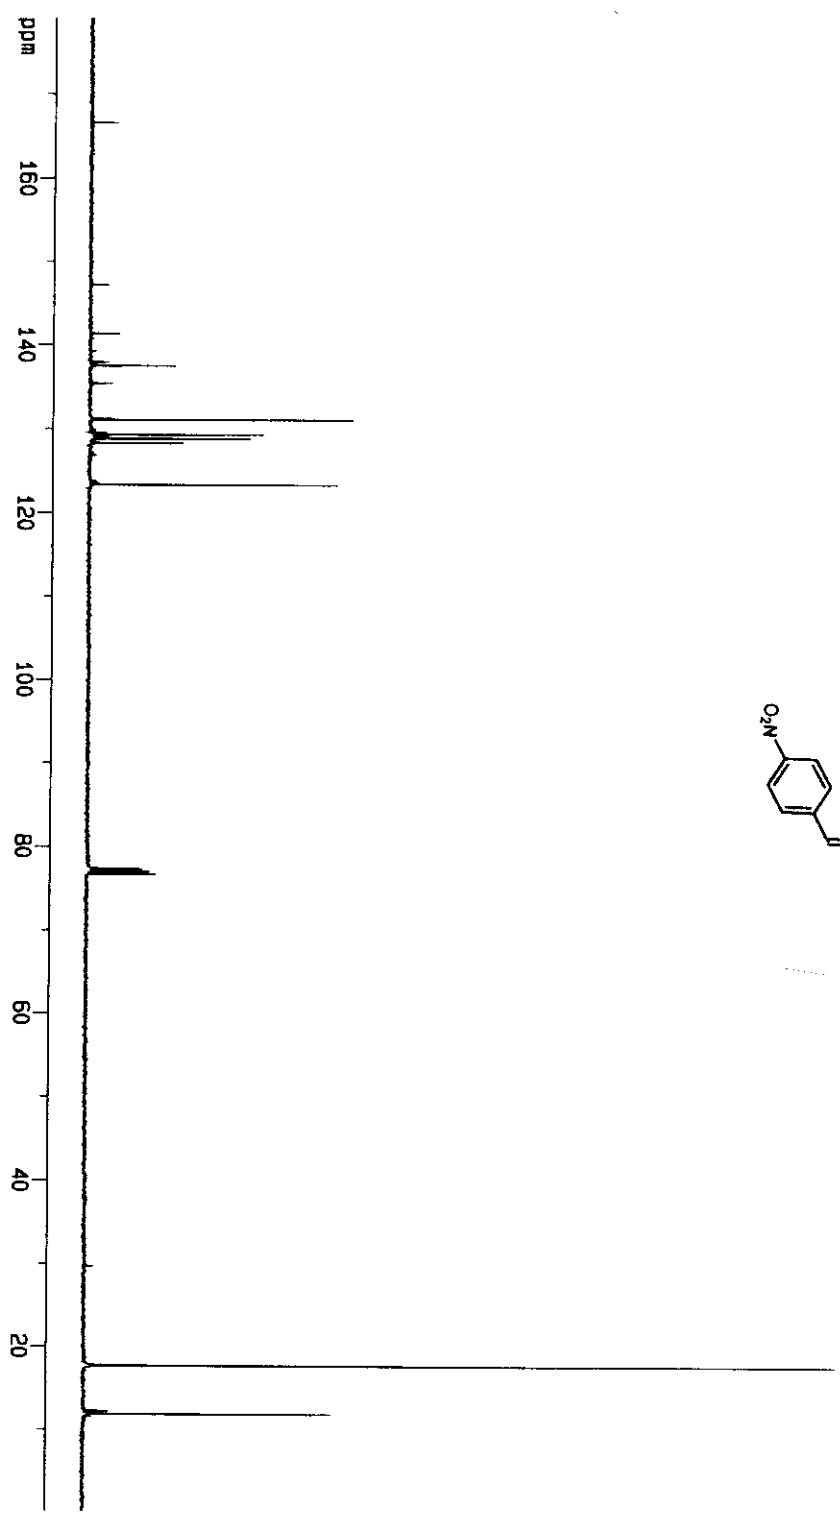

Current Data Parameters

NAME phesi\_NO2benz

EXPNO 1

PROCNO 1

F2 - Acquisition Parameters

Date\_ 20051230

Time 16.38

INSTRUM spect

PROBHD 5 mm QNP 1H

PULPROG zgpg

TD 121208

SOLVENT CDCl3

NS 622

DS 0

SMH 30303.031 Hz

FTDRES 0.250008 Hz

AQ 1.9999820 sec

RG 2048

DM 16.500 usec

DE 7.50 usec

TE 300.0 K

D1 3.00000000 sec

d11 0.03000000 sec

===== CHANNEL f1 =====

NUC1 13C

P1 11.00 usec

PL1 -2.00 dB

SF01 100.6258087 MHz

===== CHANNEL f2 =====

CPDPRG2 waltz16

NUC2 1H

PCPD2 101.00 usec

PL2 120.00 dB

PL12 19.00 dB

SF02 400.1324710 MHz

F2 - Processing parameters

SI 16384

SF 100.6127736 MHz

WDW EM

SSB 0

LB 1.00 Hz

GB 0

PC 1.00

1D NMR plot parameters

CX 20.00 cm

F1P 179.089 ppm

F1 18018.66 Hz

F2P 0.240 ppm

F2 24.15 Hz

PPKCH 8.94246 ppm/cm

HZCH 899.72571 Hz/cm

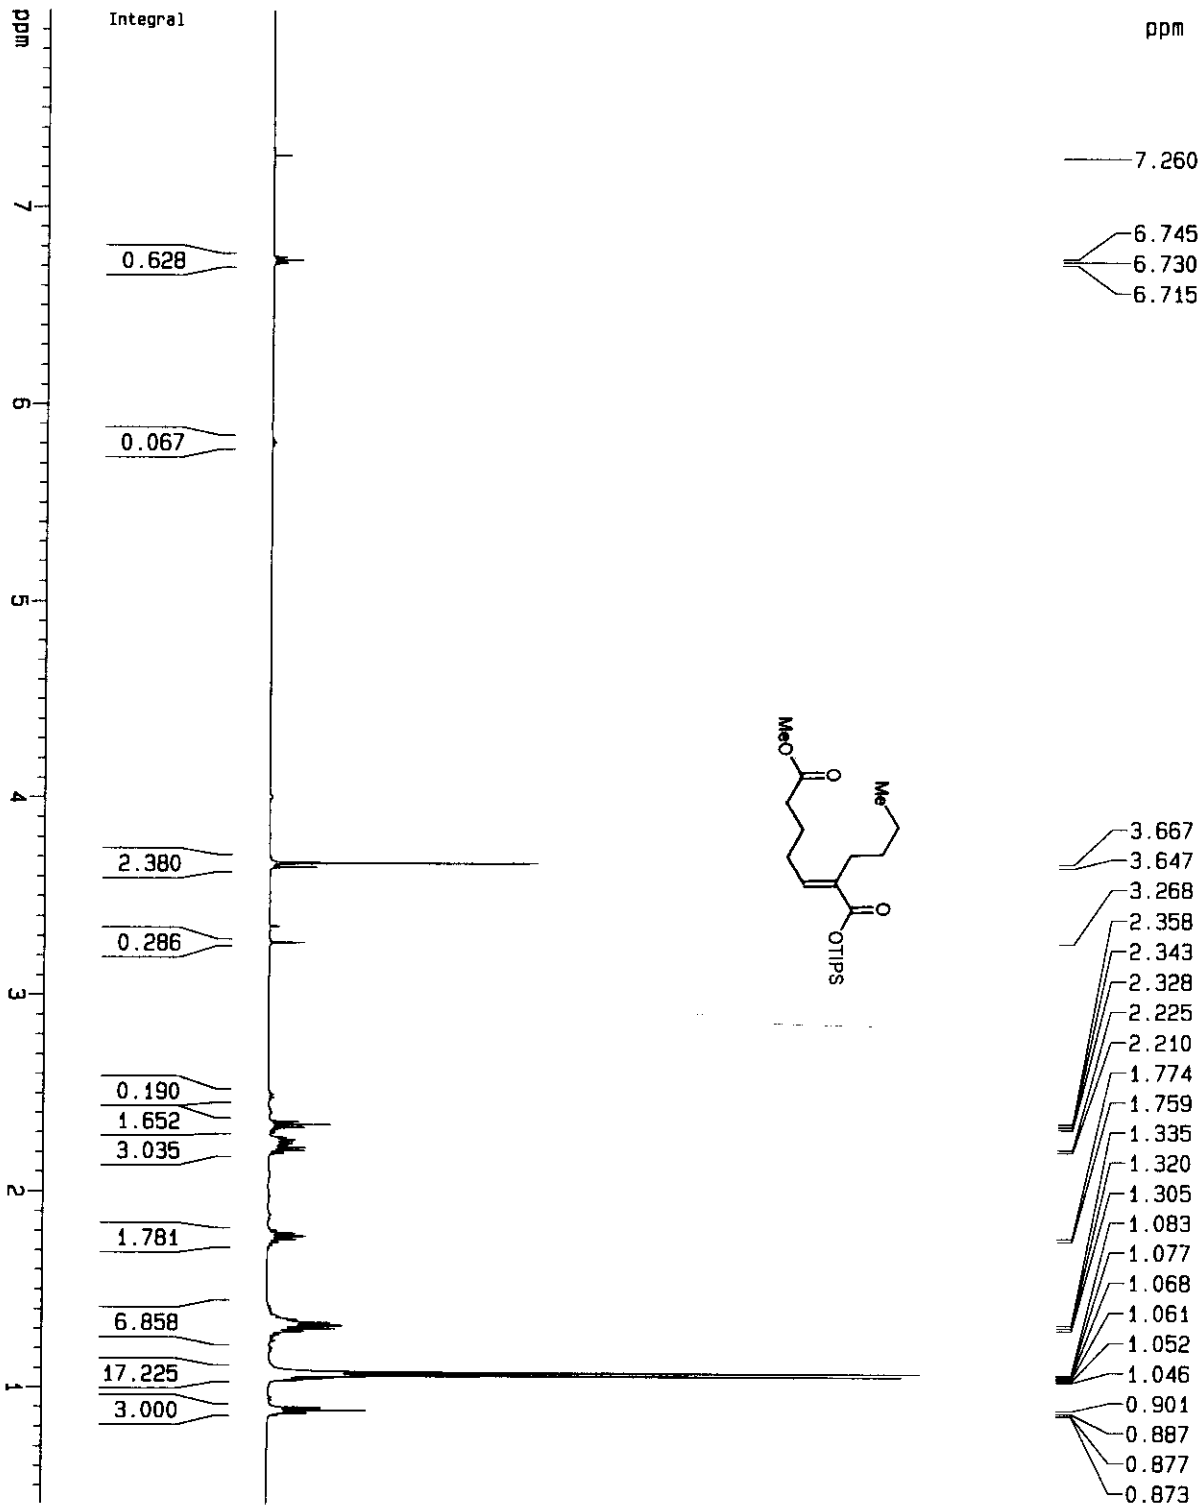

Current Data Parameters  
 NAME ester\_jd011229  
 EXPNO 2  
 PROCNO 1

F2 - Acquisition Parameters  
 Date\_ 20051229  
 Time 21.50  
 INSTRUM spect  
 PROBHD 5 mm QNP 1H  
 PULPROG zg  
 TD 32768  
 SOLVENT CDCl3  
 NS 4  
 DS 0  
 SMH 7507.507 Hz  
 FIDRES 0.229111 Hz  
 AQ 2.1823988 sec  
 RG 32  
 DW 66.600 usec  
 DE 4.50 usec  
 TE 300.0 K  
 D1 10.00000000 sec

==== CHANNEL f1 =====  
 NUC1 1H  
 P1 10.00 usec  
 PL1 0.00 dB  
 SF01 500.1335009 MHz

F2 - Processing parameters  
 S1 16384  
 SF 500.1300152 MHz  
 WDM EM  
 SSB 0  
 LB 0.30 Hz  
 GB 0  
 PC 1.00

1D NMR plot parameters  
 CX 20.00 cm  
 F1P 7.997 ppm  
 F1 3999.44 Hz  
 F2P 0.408 ppm  
 F2 204.26 Hz  
 PPMCM 0.37942 ppm/cm  
 HZCM 189.75929 Hz/cm

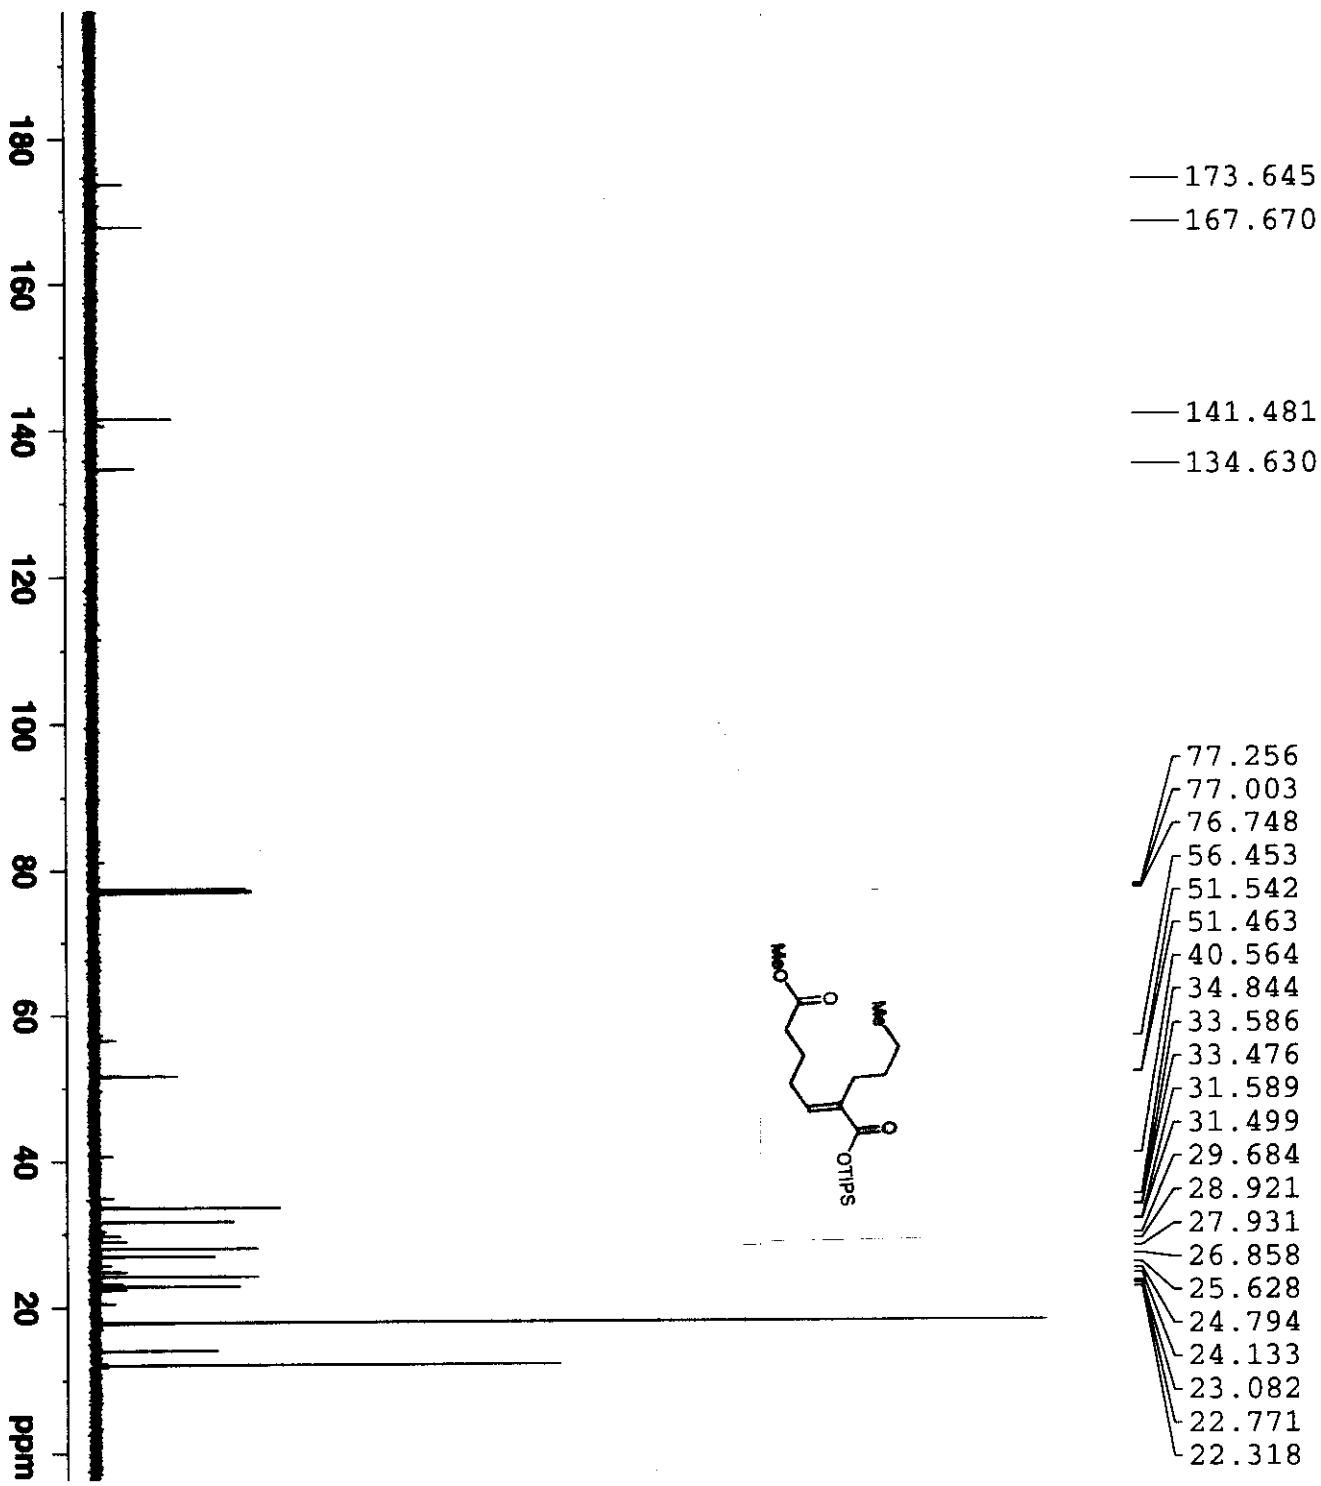

```

NAME          c:\name1.pdt
EXPNO         2
PROCNO        1
Date_         20080326
Time         17.52
INSTRUM       spect
PROBHD        5 mm PAQNP 1H/
PULPROG       zgpg
TD            197364
SOLVENT       CDCl3
NS            81
DS            0
SWH           29761.904 Hz
FIDRES        0.150797 Hz
AQ            3.3157651 se
RG            2050
DE            16.800 use
TE            296.1 K
D1            4.00000000 se
D11           0.03000000 se
TDO           1

===== CHANNEL f1 =====
NUC1          13C
P1            8.00 use
PL1           1.00 de
PL1W          72.42802429 W
SFO1          125.7716224 MH

===== CHANNEL f2 =====
CPDPRG2      waltz16
NUC2          1H
PCPD2        80.00 use
PL2           0.00 de
PL2W         16.50 de
PL13         17.00 de
PL2W         24.54113007 W
PL12W        0.54940748 W
PL13W        0.48965994 W
SFO2         500.1325006 MH
SI           131072
SF           125.7577890 MH
WDW          EM
SSB          0
LB           0.30 Hz
GB           0
PC           1.40
  
```

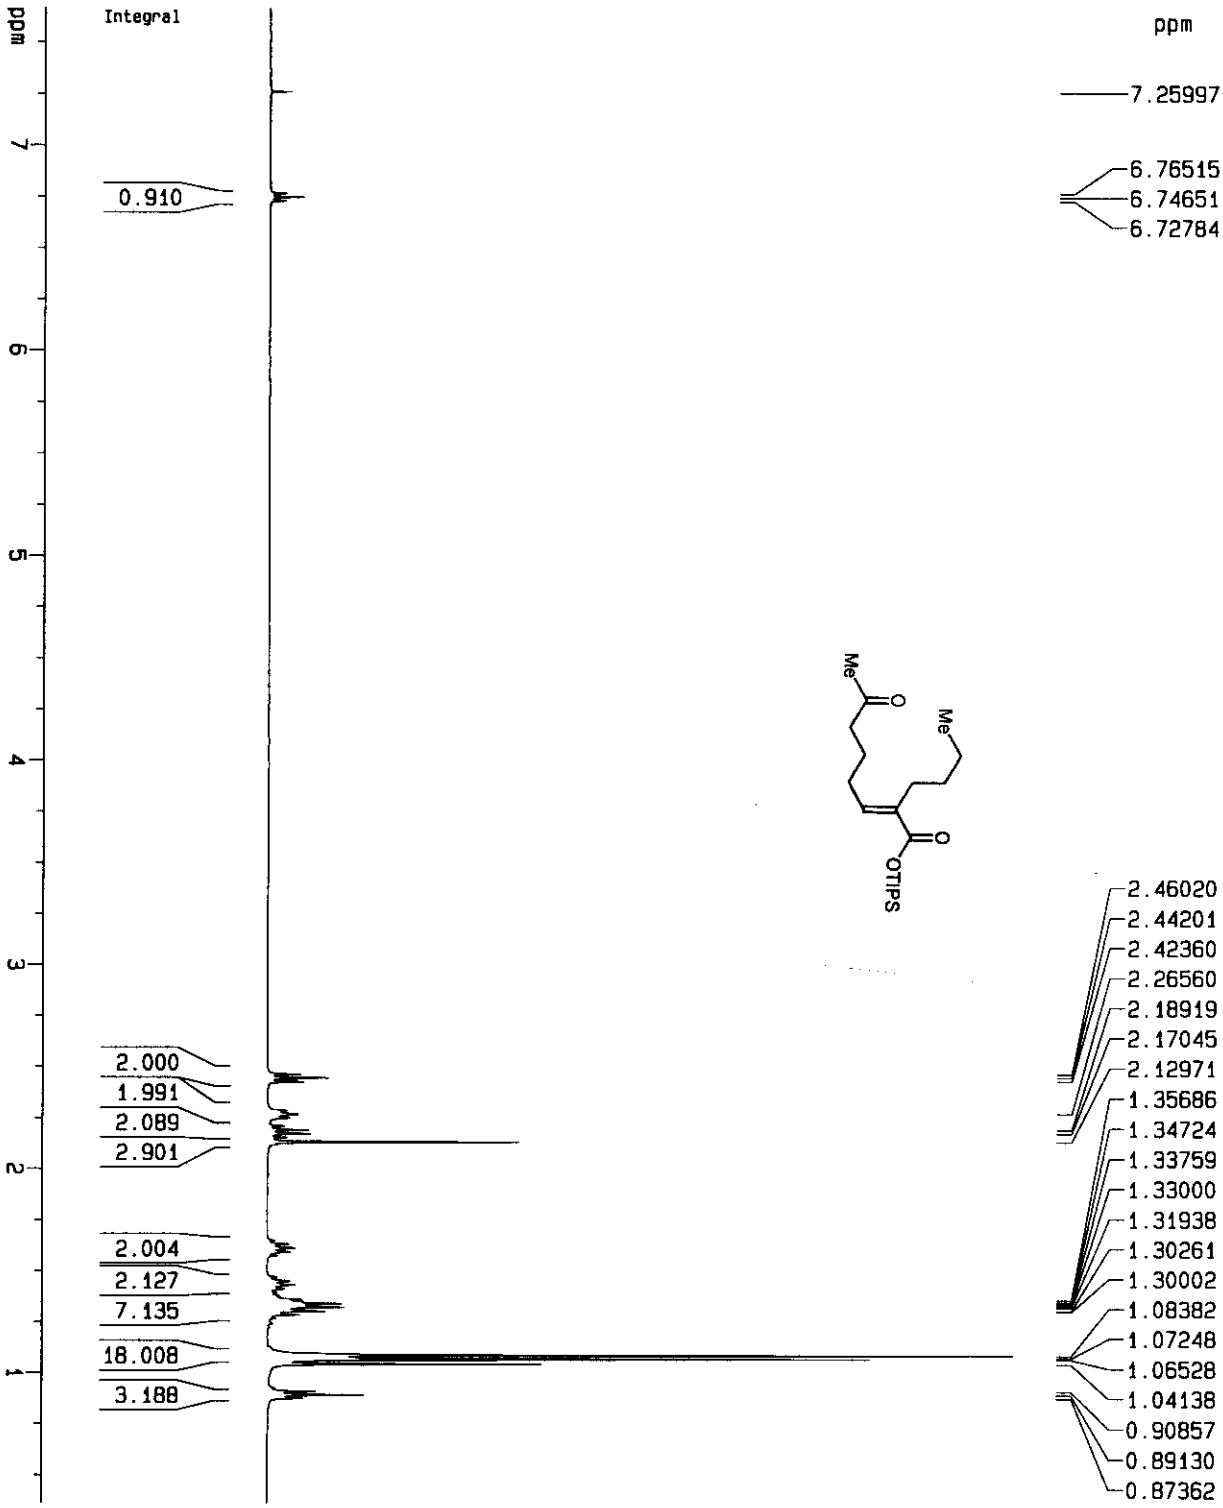

ppm

7.25997  
6.76515  
6.74651  
6.72784

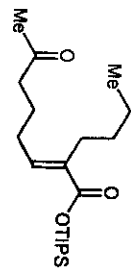

2.46020  
2.44201  
2.42360  
2.26560  
2.18919  
2.17045  
2.12971  
1.35686  
1.34724  
1.33759  
1.33000  
1.31938  
1.30261  
1.30002  
1.08382  
1.07248  
1.06528  
1.04138  
0.90857  
0.89130  
0.87362

2.000  
1.991  
2.089  
2.901  
2.004  
2.127  
7.135  
18.008  
3.188

Current Data Parameters  
NAME ketolide.pdt  
EXPNO 3  
PROCNO 1

F2 - Acquisition Parameters  
Date\_ 20060102  
Time 20.04  
INSTRUM spect  
PROBHD 5 mm QNP 1H  
PULPROG zg  
TD 16384  
SOLVENT CDCl3  
DS 4  
NS 0  
SMH 4807.692 Hz  
FIDRES 0.293438 Hz  
AQ 1.7039860 sec  
RG 35.9  
DM 104.000 usec  
DE 6.00 usec  
TE 300.0 K  
D1 10.00000000 sec

\*\*\*\*\* CHANNEL f1 \*\*\*\*\*  
NUC1 1H  
P1 10.50 usec  
PL1 0.00 dB  
SFO1 400.1320007 MHz

F2 - Processing parameters  
SI 32768  
SF 400.1300101 MHz  
WDW EM  
SSB 0  
LB 0.30 Hz  
GB 0  
PC 1.00

1D NMR plot parameters  
CX 20.00 cm  
F1P 7.667 ppm  
F1 3057.81 Hz  
F2P 0.360 ppm  
F2 143.93 Hz  
PPMCM 0.36537 ppm/cm  
HZCM 146.19418 Hz/cm

ppm

208.75

167.81

142.50

133.94

77.33

77.01

76.69

43.45

31.60

29.88

28.49

28.43

26.85

23.55

22.77

17.85

17.68

13.98

12.26

11.99

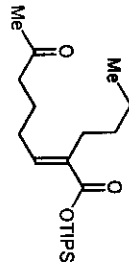

ppm

Current Data Parameters  
 NAME KetoIaIe.pdt  
 EXPNO 4  
 PROCNO 1

F2 - Acquisition Parameters  
 Date\_ 20060102  
 Time 20.08  
 INSTRUM spect  
 PROBDW 5 mm QNP 1H  
 PULPROG zgdc  
 TO 121208  
 SOLVENT CDCl3  
 NS 299  
 DS 0  
 SWH 30303.031 Hz  
 FIDRES 0.250008 Hz  
 AQ 1.9999820 sec  
 RG 4597.6  
 DW 16.500 usec  
 DE 7.50 usec  
 TE 300.0 K  
 D1 3.00000000 sec  
 d11 0.03000000 sec

\*\*\*\*\* CHANNEL f1 \*\*\*\*\*  
 NUC1 13C  
 P1 11.00 usec  
 PL1 -2.00 dB  
 SFO1 100.6258087 MHz

\*\*\*\*\* CHANNEL f2 \*\*\*\*\*  
 CPDPRG2 waltz16  
 NUC2 1H  
 PCPD2 101.00 usec  
 PL2 120.00 dB  
 PL12 19.00 dB  
 SFO2 400.1324710 MHz

F2 - Processing Parameters  
 SI 16384  
 SF 100.6127718 MHz  
 KW 0  
 SSB 0  
 LB 1.00 Hz  
 GB 0  
 PC 1.00

1D NMR plot parameters  
 CX 20.00 cm  
 F1P 226.646 ppm  
 F1 22803.44 Hz  
 F2P -7.055 ppm  
 F2 -709.84 Hz  
 PPMCM 11.68504 ppm/cm  
 HZCM 1175.66394 Hz/cm

200

150

100

50

0
